# Supplementary material for: Decoded fingerprints of hyperresponsive, expanding product space: polyether cascade cyclizations as tools to elucidate supramolecular catalysis
Source: Royal Society of Chemistry journal article supplement (doi:10.1039/d2sc03991e), 2022-01-01
Supplement: d2sc03991e1.pdf [file d2sc03991e1.pdf]

Electronic Supplementary Material (ESI) for Chemical Science.  
This journal is © The Royal Society of Chemistry 2022

### Supplementary information

#### **Decoded fingerprints of hyperresponsive, expanding product space: Polyether cascade cyclizations as tools to elucidate supramolecular catalysis**

Hao Chen,<sup>a,b</sup> Tian-Ren Li,<sup>a,c</sup> Naomi Sakai,<sup>a,b</sup> Celine Besnard,<sup>b</sup> Laure Guénée,<sup>b</sup> Marion Pupier,<sup>b</sup>  
Jasmine Viger-Gravel,<sup>b</sup> Konrad Tiefenbacher<sup>a,c,d</sup> and Stefan Matile<sup>\*a,b</sup>

<sup>a</sup>National Centre of Competence in Research (NCCR) Molecular Systems Engineering, BPR  
1095, Basel, Switzerland.

<sup>b</sup>Department of Organic Chemistry University of Geneva, Geneva, Switzerland.

<sup>c</sup>Department of Chemistry, University of Basel, Basel, Switzerland.

<sup>d</sup>Department of Biosystems Science and Engineering, ETH, Zurich, Basel, Switzerland.

\*E-mail: stefan.matile@unige.ch

## Table of contents

|        |                                                                  |     |
|--------|------------------------------------------------------------------|-----|
| 1.     | Materials and methods                                            | S3  |
| 2.     | Synthesis                                                        | S4  |
| 2.1.   | Synthesis of <i>cis</i> diepoxide substrates                     | S5  |
| 2.2.   | Synthesis of <i>trans</i> diepoxide substrates                   | S8  |
| 3.     | Product identification                                           | S11 |
| 3.1.   | Identification of BB products                                    | S11 |
| 3.2.   | Identification of A-containing products                          | S13 |
| 3.3.   | Identification of products with acyclic and rearrangement motifs | S20 |
| 4.     | Catalysis                                                        | S22 |
| 4.1.   | Catalysis with <i>cis</i> diepoxide substrates                   | S22 |
| 4.1.1. | Brønsted-acid catalyst AcOH                                      | S24 |
| 4.1.2. | $\pi$ -Basic capsule catalyst <b>8</b>                           | S26 |
| 4.1.3. | Pnictogen-bonding catalyst <b>9</b>                              | S28 |
| 4.1.4. | $\pi$ -Acidic catalyst <b>10</b>                                 | S31 |
| 4.2.   | Catalysis with <i>trans</i> diepoxide substrates                 | S33 |
| 4.2.1. | Brønsted-acid catalyst AcOH                                      | S35 |
| 4.2.2. | $\pi$ -Basic capsule catalyst <b>8</b>                           | S37 |
| 4.2.3. | Pnictogen-bonding catalyst <b>9</b>                              | S39 |
| 4.2.4. | $\pi$ -Acidic catalyst <b>10</b>                                 | S41 |
| 5.     | Kinetics analysis                                                | S43 |
| 6.     | NMR spectra                                                      | S49 |
| 7.     | X-ray crystallography                                            | S77 |
| 8.     | Supplementary references                                         | S89 |

## 1. Materials and methods

As in reference S1, Supplementary Information. Reagents for synthesis were purchased from Fluka, Sigma-Aldrich, Apollo Scientific and Acros. All solvents used in this study were passed through a 3.0 cm ALOX basic column to remove acidic impurities (such as HCl). Column chromatography was carried out on silica gel (SiliaFlash<sup>®</sup> P60, SILICYCLE, 230–400 mesh). Analytical (TLC) and preparative thin layer chromatography (PTLC) were performed on silica gel 60 F254 (Merck) and silica gel (SiliCycle, 1000  $\mu\text{m}$ ), respectively. Chiral Gas chromatography (GC) was performed on Agilent 6850 Series gas chromatographs equipped with a split-mode capillary injection system and flame ionization detectors using chiral stationary Hydrodex Gamma DiMOM column (50 m x 0.25 mm ID). Separation parameters: 60 °C, 1 °C/min, until 170 °C, then hold at 170 °C for 20 min (Speed: 60 cm/s H<sub>2</sub>, injector temperature: 170 °C). <sup>1</sup>H and <sup>13</sup>C NMR spectra were recorded (as indicated) either on a Bruker 400 MHz or 500 MHz spectrometer and are reported as chemical shifts ( $\delta$ ) in ppm relative to TMS ( $\delta = 0$ ). Spin multiplicities are reported as a singlet (s), doublet (d), triplet (t) and quartet (q), with coupling constants ( $J$ ) given in Hz, or multiplet (m). Broad peaks are marked as br. <sup>1</sup>H and <sup>13</sup>C resonances were assigned with the aid of additional information from 1D and 2D NMR spectra.

**Abbreviations.** A: anti-Baldwin; B: Baldwin; *m*-CPBA: *meta*-Chloroperoxybenzoic acid; DMAP: 4-Dimethylaminopyridine; EDTA: Ethylenediaminetetraacetic acid; GC-FID: Gas chromatography flame ionization detector; HM: House-Meinwald; HPLC: High-performance liquid chromatography; HSQC: Heteronuclear single quantum coherence spectroscopy; NMR: Nuclear magnetic resonance; rt: Room temperature; TBAF: Tetra-*n*-butylammonium fluoride; THF: Tetrahydrofuran; TMS: Tetramethylsilane.

## 2. Synthesis

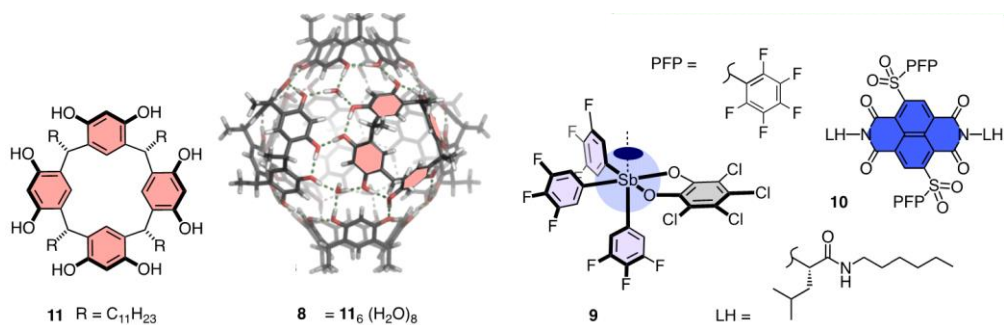

**Figure S1.** Structure of catalysts utilized in the di-epoxide opening.

**Compound 9** was prepared following previously reported procedures.<sup>S2</sup>

**Compound 10** was prepared following previously reported procedures.<sup>S3</sup>

**Compound 11** was prepared following previously reported procedures.<sup>S4</sup>

**Compound *cis*-14** was prepared following previously reported procedures.<sup>S5</sup>

**Compounds *cis*-15, *cis*-16, *trans*-15 and *trans*-16** were prepared following previously reported procedures.<sup>S6</sup>

**Compounds *cis*-17 and *trans*-17** were prepared following previously reported procedures.<sup>S7</sup>

**Compound *cis*-1** was prepared following previously reported procedures.<sup>S2</sup>

**Compound *trans*-1** was prepared following previously reported procedures.<sup>S8</sup>

## 2.1. Synthesis of *cis* diepoxide substrates

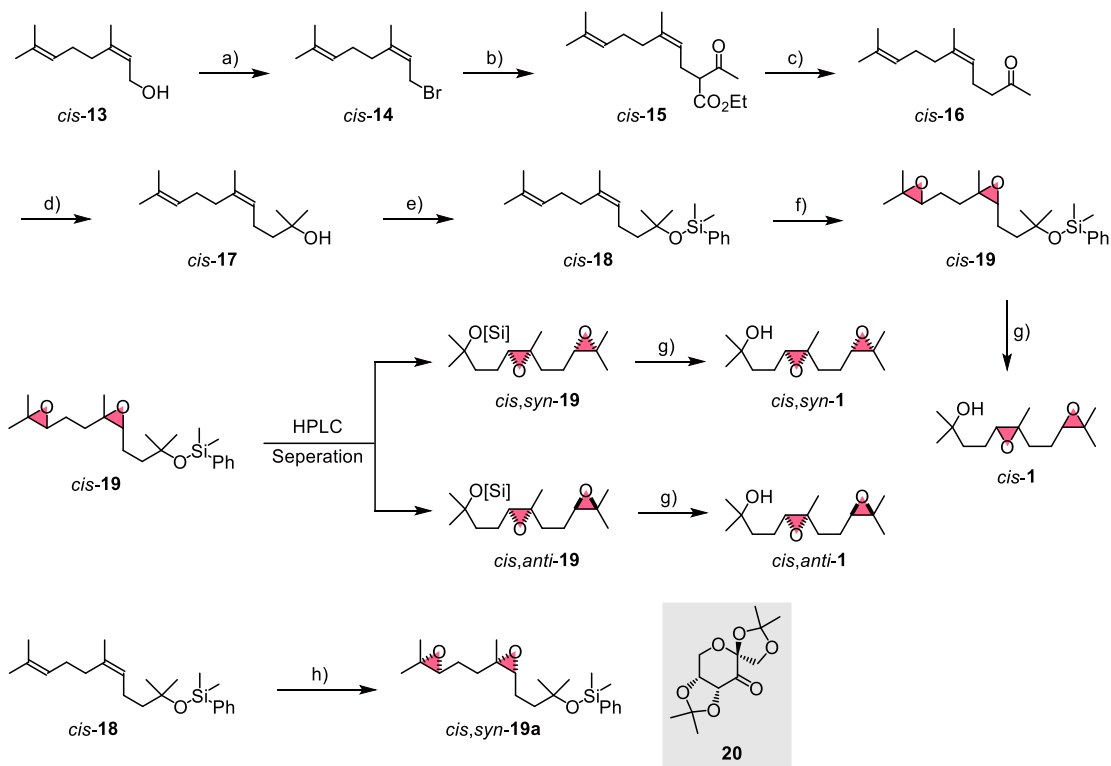

**Scheme S1** (a)  $\text{PBr}_3$ ,  $\text{Et}_2\text{O}$ ,  $0\text{ }^\circ\text{C}$ ; (b) ethyl acetoacetate,  $\text{NaH}$ ,  $\text{THF}$ ,  $0\text{ }^\circ\text{C}$  to rt, 46% (two steps); (c)  $\text{NaOH}$  (aq),  $\text{EtOH}$ , reflux, 52%; (d)  $\text{MeMgBr}$ ,  $\text{Et}_2\text{O}$ ,  $0\text{ }^\circ\text{C}$  to rt, 98%; (e)  $\text{PhMe}_2\text{SiCl}$ ,  $\text{Et}_3\text{N}$ ,  $\text{CH}_2\text{Cl}_2$ ,  $0\text{ }^\circ\text{C}$  to rt, 73%; (f) *m*-CPBA,  $\text{CH}_2\text{Cl}_2$ ,  $0\text{ }^\circ\text{C}$  to rt, 85%; (g) TBAF,  $\text{THF}$ ,  $0\text{ }^\circ\text{C}$  to rt, 91% (*cis*-**1**), 94% (*cis,syn*-**1**), 91% (*cis,anti*-**1**); (h)  $\text{Na}_2\text{B}_4\text{O}_7 \cdot 10\text{H}_2\text{O}$ ,  $\text{Na}_2\text{EDTA}$ , *n*- $\text{Bu}_4\text{NHSO}_4$ , **20**, Oxone,  $\text{K}_2\text{CO}_3$ ,  $\text{H}_2\text{O}/\text{MeOCH}_2\text{OMe}/\text{MeCN}$  (10:6:3), *cis,syn*-**19a**, 82%, d.r. 89:11.

**Compound *cis*-18.** To a solution of *cis*-**17** (1.05 g, 5.00 mmol) in  $\text{CH}_2\text{Cl}_2$  (20 mL) was added triethylamine (836  $\mu\text{L}$ , 6.00 mmol) at  $0\text{ }^\circ\text{C}$ , then chloro(dimethyl)phenylsilane (856  $\mu\text{L}$ , 5.10 mmol) was slowly added into the solution and the resulting mixture was gradually warmed to rt after 10 min. The mixture was stirred at rt and stopped after 8 h when the complete

consumption of the starting material was observed. The crude mixture was purified by silica gel column chromatography directly (pentane/EtOAc 100:0 to 80:1) to give *cis*-**18** (1.25 g, 73%) as a light yellow oil.  $R_f$  (pentane/Et<sub>2</sub>O 100:1): 0.8; <sup>1</sup>H NMR (500 MHz, CDCl<sub>3</sub>): 7.60 – 7.59 (m, 2H), 7.35 – 7.34 (m, 3H), 5.12 – 5.09 (m, 2H), 2.08 – 2.04 (m, 6H), 1.68 (s, 6H), 1.60 (s, 3H), 1.48 – 1.45 (m, 2H), 1.21 (s, 6H), 0.37 (s, 6H); <sup>13</sup>C NMR (125 MHz, CDCl<sub>3</sub>): 140.7 (C), 135.0 (C), 133.5 (CH), 131.6 (C), 129.2 (CH), 127.8 (CH), 125.7 (CH), 124.5 (CH), 74.7 (C), 45.2 (CH<sub>3</sub>), 32.1 (CH<sub>3</sub>), 30.0 (2CH<sub>2</sub>), 26.8 (CH<sub>3</sub>), 25.9 (CH<sub>2</sub>), 23.6 (CH<sub>2</sub>), 23.1 (CH<sub>3</sub>), 1.6 (CH<sub>3</sub>).

**Compound *cis*-19.** To a solution of *cis*-**18** (0.41 g, 1.2 mmol) in CH<sub>2</sub>Cl<sub>2</sub> (15 mL) was added *m*-CPBA (70% purity, 1.3 g, 5.2 mmol) portionwisely at 0 °C. The resulting mixture was gradually warmed to rt after 10 min. The mixture was stirred at rt and stopped after 2 h when the complete consumption of the starting material was observed. The crude mixture was purified by silica gel column chromatography directly (pentane/Et<sub>2</sub>O 19:1 to 3:1) to give *cis*-**19** (0.38 g, 85%) as a light yellow oil. The two diastereomers *cis,syn*-**19** and *cis,anti*-**19** could be obtained by the separation of *cis*-**19** with preparative HPLC (CHIRALPAK® IA (20 mm ø x 250 mmL), 12.8 mL/min, hexane/Et<sub>2</sub>O 4:1).  $R_f$  (pentane/Et<sub>2</sub>O 3:1): 0.5; <sup>1</sup>H NMR (500 MHz, CDCl<sub>3</sub>): 7.61 – 7.50 (m, 2H), 7.38 – 7.31 (m, 3H), 2.77 – 2.56 (m, 2H), 1.73 – 1.58 (m, 7H), 1.56 – 1.50 (m, 1H), 1.30 (s, 3H), 1.281 (s, 3H), 1.275 (s, 3H), 1.22 (s, 3H), 1.21 (s, 3H), 0.37 (s, 6H); <sup>13</sup>C NMR (125 MHz, CDCl<sub>3</sub>): 141.1 (C), 133.4 (CH), 129.3 (CH), 127.8 (CH), 74.3 (C), 65.3 (CH), 64.2 (CH), 60.7 (C), 58.6 (C), 41.4 (CH<sub>2</sub>), 30.2 (CH<sub>3</sub>), 29.8 (CH<sub>3</sub>), 29.6 (CH<sub>2</sub>), 25.2 (CH<sub>2</sub>), 25.0 (CH<sub>3</sub>), 23.8 (CH<sub>2</sub>), 22.4 (CH<sub>3</sub>), 18.8 (CH<sub>3</sub>), 1.54 (CH<sub>3</sub>), 1.52 (CH<sub>3</sub>).

**Shi epoxidation.** Compound *cis*-**18** (856 mg, 2.48 mmol) was dissolved in a mixture of MeOCH<sub>2</sub>OMe/MeCN (2:1, 37.2 mL). A 0.05 M solution of Na<sub>2</sub>B<sub>4</sub>O<sub>7</sub>·10H<sub>2</sub>O (in 4×10<sup>-4</sup> M

aqueous solution of Na<sub>2</sub>EDTA, 17.4 mL), *n*-Bu<sub>4</sub>NHSO<sub>4</sub> (55.6 mg, 0.160 mmol) and **20** (384 mg, 1.49 mmol) were sequentially added under vigorous stirring at 0 °C. To this mixture solution of Oxone (3.66 g, 11.9 mmol, in 4×10<sup>-4</sup> M aqueous solution of Na<sub>2</sub>EDTA, 12.4 mL), and K<sub>2</sub>CO<sub>3</sub> (3.43 g, 24.8 mmol, in water (12.4 mL)), were simultaneously added over 1 h via syringe pump. At this point, the mixture was diluted with water (20 mL), and extracted with EtOAc (3 x 30 mL). The combined organic layers were washed with brine, dried over Na<sub>2</sub>SO<sub>4</sub>, and purified by flash column chromatography (pentane/Et<sub>2</sub>O 19:1 to 3:1) to give *cis,syn*-**19a** (0.77 g, 82%, d.r. 89:11) as a light yellow oil. The diastereoselectivity of compound *cis,syn*-**19a** could be improved to >20:1 after purification with preparative HPLC (CHIRALPAK<sup>®</sup> ID (10 mm ø x 250 mmL), 3.2 mL/min, hexane/Et<sub>2</sub>O 6:1).

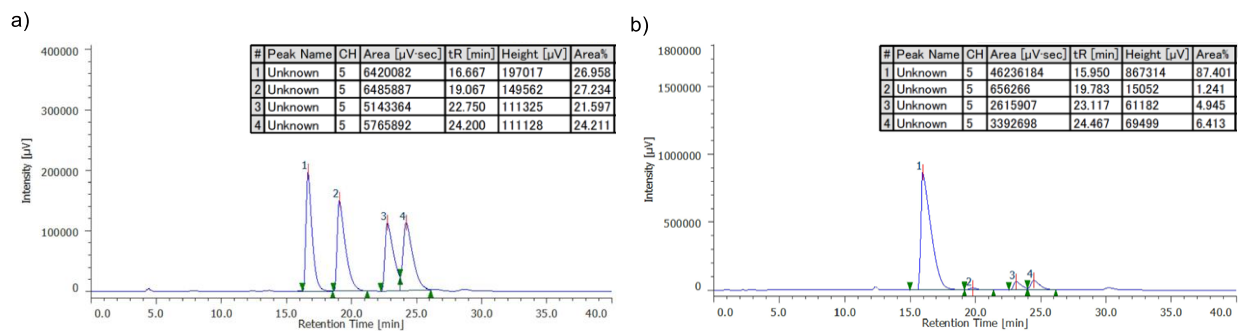

**Figure S2.** HPLC chromatograms of a) *cis*-**19** and b) *cis,syn*-**19a** (CHIRALPAK<sup>®</sup> ID (4.6 mm ø x 250 mmL), 0.8 mL/min, hexane/Et<sub>2</sub>O 6:1).

## 2.2. Synthesis of *trans* diepoxide substrates

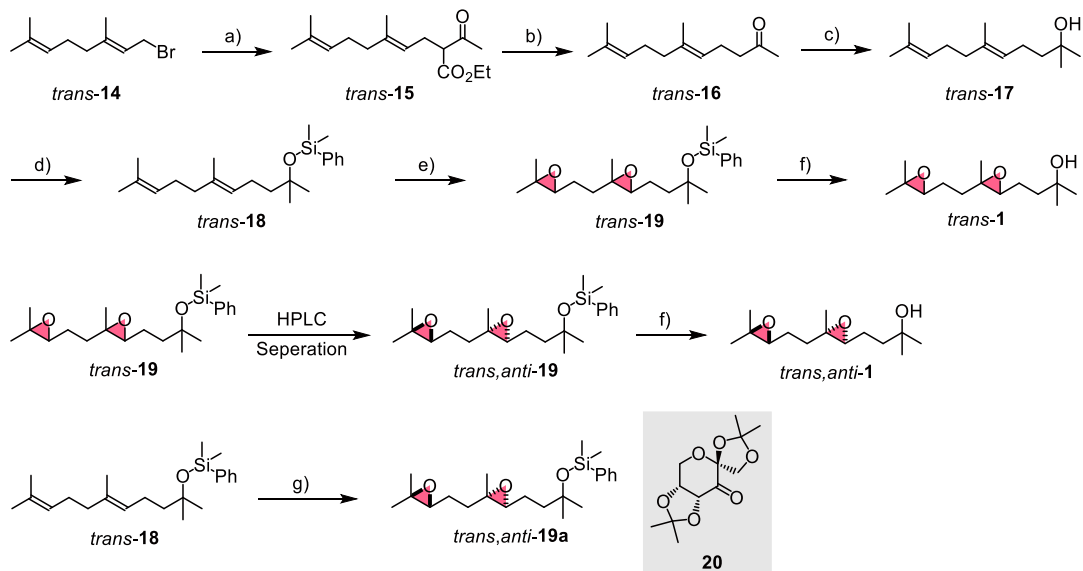

**Scheme S2** (a) Ethyl acetoacetate, NaH, THF, 0 °C to rt, 66%; (b) NaOH (aq), EtOH, reflux, 79%; (c) MeMgBr, Et<sub>2</sub>O, 0 °C to rt, 99%; (d) PhMe<sub>2</sub>SiCl, Et<sub>3</sub>N, CH<sub>2</sub>Cl<sub>2</sub>, 0 °C to rt, 68%; (e) *m*-CPBA, CH<sub>2</sub>Cl<sub>2</sub>, 0 °C to rt, 88%; (f) TBAF, THF, 0 °C to rt, 91% (*trans*-**1**), 90% (*trans,anti*-**1**); (g) Na<sub>2</sub>B<sub>4</sub>O<sub>7</sub>•10H<sub>2</sub>O, Na<sub>2</sub>EDTA, *n*-Bu<sub>4</sub>NHSO<sub>4</sub>, **20**, Oxone, K<sub>2</sub>CO<sub>3</sub>, H<sub>2</sub>O/MeOCH<sub>2</sub>OMe/MeCN (10:6:3), *trans,anti*-**19a**, 67%, d.r. 82:18.

**Compound *trans*-18.** To a solution of *trans*-**17** (1.0 g, 4.9 mmol) in CH<sub>2</sub>Cl<sub>2</sub> (20 mL) was added triethylamine (818 μL, 5.87 mmol) at 0 °C, then chloro(dimethyl)phenylsilane (837 μL, 5.00 mmol) was slowly added into the solution and the resulting mixture was gradually warmed to rt after 10 min. The mixture was stirred at rt and stopped after 8 h when the complete consumption of the starting material was observed. The crude mixture was purified by silica gel column chromatography directly (pentane/EtOAc 100:0 to 80:1) to give *trans*-**18** (1.15 g, 68%) as a light yellow oil. *R*<sub>f</sub> (pentane/Et<sub>2</sub>O 100:1): 0.8; <sup>1</sup>H NMR (500 MHz, CDCl<sub>3</sub>): 7.63 – 7.56 (m,



2H), 7.38 – 7.31 (m, 3H), 5.15 – 5.03 (m, 2H), 2.11 – 2.02 (m, 4H), 2.00 – 1.95 (m, 2H), 1.68 (d,  $^4J_{\text{H-H}} = 1.4$  Hz, 3H), 1.60(5) (s, 3H), 1.60(0) (s, 3H), 1.50 – 1.40 (m, 2H), 1.21 (s, 6H), 0.38 (s, 6H);  $^{13}\text{C}$  NMR (125 MHz,  $\text{CDCl}_3$ ): 140.8 (C), 134.9 (C), 133.5 (CH), 131.4 (C), 129.2 (CH), 127.7 (CH), 124.9 (CH), 124.6 (CH), 74.7 (C), 44.9 ( $\text{CH}_2$ ), 39.9 ( $\text{CH}_2$ ), 30.0 ( $\text{CH}_3$ ), 26.9 ( $\text{CH}_2$ ), 25.9 ( $\text{CH}_3$ ), 23.2 ( $\text{CH}_2$ ), 17.8 ( $\text{CH}_3$ ), 16.1 ( $\text{CH}_3$ ), 1.6 ( $\text{CH}_3$ ).

**Compound *trans*-19.** To a solution of *trans*-18 (187 mg, 0.543 mmol) in  $\text{CH}_2\text{Cl}_2$  (5 mL) was added *m*-CPBA (70% purity, 589 mg, 2.39 mmol) portionwisely at 0 °C. The resulting mixture was gradually warmed to rt after 10 min. The mixture was stirred at rt and stopped after 2 h when the complete consumption of the starting material was observed. The crude mixture was purified by silica gel column chromatography directly (pentane/ $\text{Et}_2\text{O}$  19:1 to 3:1) to give *trans*-19 (0.18 g, 88%) as a light yellow oil. The two diastereomers *trans,syn*-19 and *trans,anti*-19 could be obtained by the separation of *trans*-19 with preparative HPLC (CHIRALPAK® IA (20 mm  $\varnothing$  x 250 mmL), 12.8 mL/min, hexane/ $\text{Et}_2\text{O}$  4:1).  $R_f$  (pentane/ $\text{Et}_2\text{O}$  3:1): 0.5;  $^1\text{H}$  NMR (500 MHz,  $\text{CDCl}_3$ ): 7.60 – 7.52 (m, 2H), 7.38 – 7.32 (m, 3H), 2.75 – 2.65 (m, 2H), 1.82 – 1.74 (m, 1H), 1.70 – 1.57 (m, 5H), 1.55 – 1.46 (m, 2H), 1.31 (s, 3H), 1.27 (s, 3H), 1.26 (s, 3H), 1.22 (s, 3H), 1.21 (s, 3H);  $^{13}\text{C}$  NMR (125 MHz,  $\text{CDCl}_3$ ): 140.4 (C), 133.4 (CH), 129.3 (CH), 127.8 (CH), 74.2 (C), 64.0 (CH), 63.5 (CH), 60.5 (C), 58.6 (C), 41.3 ( $\text{CH}_2$ ), 35.4 ( $\text{CH}_2$ ), 30.2 ( $\text{CH}_3$ ), 29.8 ( $\text{CH}_3$ ), 25.0 ( $\text{CH}_3$ ), 24.8 ( $\text{CH}_2$ ), 24.0 ( $\text{CH}_2$ ), 18.8 ( $\text{CH}_3$ ), 16.7 ( $\text{CH}_3$ ), 1.5 ( $\text{CH}_3$ ).

**Shi epoxidation.** Compound *trans*-18 (856 mg, 2.48 mmol) was dissolved in a mixture of  $\text{MeOCH}_2\text{OMe}/\text{MeCN}$  (2:1, 37.2 mL). A 0.05 M solution of  $\text{Na}_2\text{B}_4\text{O}_7 \cdot 10\text{H}_2\text{O}$  (in  $4 \times 10^{-4}$  M aqueous solution of  $\text{Na}_2\text{EDTA}$ , 17.4 mL), *n*- $\text{Bu}_4\text{NHSO}_4$  (55.6 mg, 0.160 mmol) and **20** (384 mg, 1.49 mmol) were sequentially added under vigorous stirring at 0 °C. To this mixtures solution of

Oxone (3.66 g, 11.9 mmol, in  $4 \times 10^{-4}$  M aqueous solution of Na<sub>2</sub>EDTA, 12.4 mL), and K<sub>2</sub>CO<sub>3</sub> (3.43 g, 24.8 mmol, in water (12.4 mL)), were simultaneously added over 1 h via syringe pump. At this point, the mixture was diluted with water (20 mL), and extracted with EtOAc (3 x 30 mL). The combined organic layers were washed with brine, and dried over Na<sub>2</sub>SO<sub>4</sub>, purified by flash column chromatography (pentane/Et<sub>2</sub>O 19:1 to 3:1) to give *trans,anti*-**19a** (0.63 g, 67%, d.r. 82:18) as a light yellow oil. The diastereoselectivity of compound *trans,anti*-**19a** could be improved to >20:1 after purification with preparative HPLC (CHIRALPAK<sup>®</sup> ID (10 mm  $\varnothing$  x 250 mmL), 3.2 mL/min, hexane/Et<sub>2</sub>O 6:1).

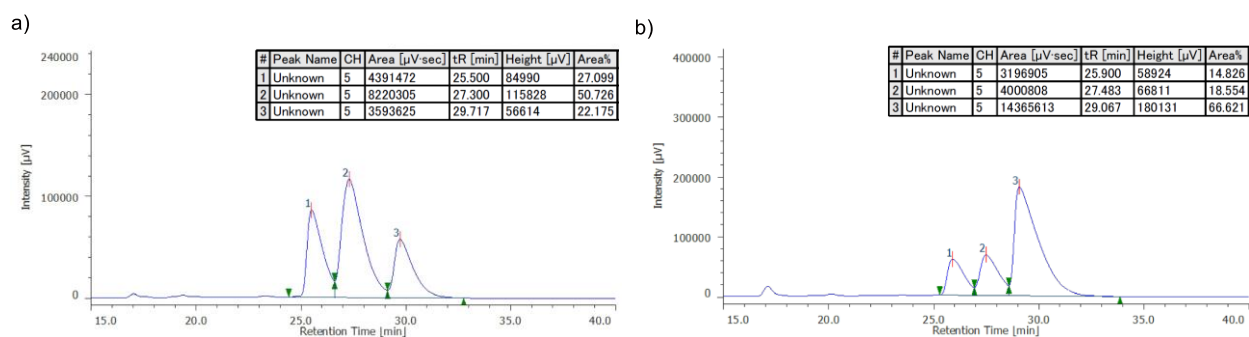

**Figure S3.** HPLC chromatograms of a) *trans*-**19** and b) *trans,anti*-**19a** (CHIRALPAK<sup>®</sup> ID (4.6 mm  $\varnothing$  x 250 mmL), 0.8 mL/min, hexane/Et<sub>2</sub>O 6:1).

### 3. Product identification

#### 3.1. Identification of BB products

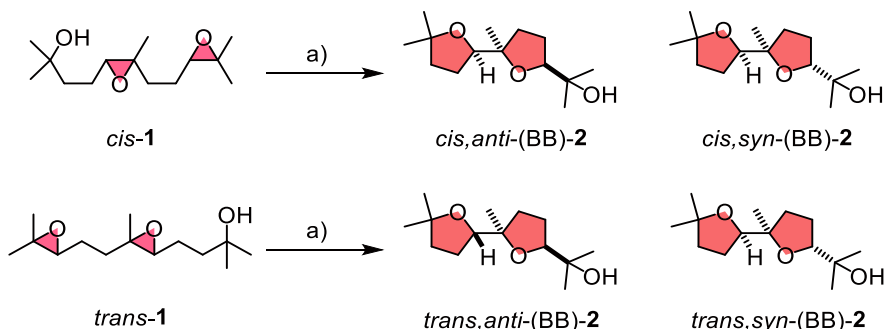

**Scheme S3** (a) AcOH, CH<sub>2</sub>Cl<sub>2</sub>, 40 °C, 48 h.

**Compounds *cis,anti*-(BB)-2 and *cis,syn*-(BB)-2.**<sup>S7</sup> To a solution of *cis*-1 (243 mg, 1.00 mmol) in CH<sub>2</sub>Cl<sub>2</sub> (4.0 mL) was added AcOH (57.5 μL, 1.00 mmol), then the solution was heated to 40 °C. The reaction was monitored by <sup>1</sup>H NMR spectroscopy and stopped after 48 h when the complete consumption of the starting material was observed. The crude mixture was purified by silica gel column chromatography directly (pentane/Et<sub>2</sub>O 19:1 to 4:1) to give *cis,anti*-(BB)-2 and *cis,syn*-(BB)-2 as light yellow oils. ***cis,anti*-(BB)-2.** *R<sub>f</sub>* (pentane/Et<sub>2</sub>O 1:1): 0.6; <sup>1</sup>H NMR (500 MHz, CD<sub>2</sub>Cl<sub>2</sub>): 3.86 – 3.80 (m, 2H), 2.15 – 2.10 (m, 1H), 2.00 – 1.85 (m, 4H), 1.74 – 1.71 (m, 2H), 1.56 – 1.51 (m, 1H), 1.25 (s, 3H), 1.20 (s, 3H), 1.19 (s, 3H), 1.11 (s, 3H), 1.02 (s, 3H); <sup>13</sup>C NMR (125 MHz, CD<sub>2</sub>Cl<sub>2</sub>): 85.9 (CH), 83.9 (C), 83.6 (CH), 81.3 (C), 72.1 (C), 38.9 (CH<sub>2</sub>), 34.8 (CH<sub>2</sub>), 28.9 (CH<sub>3</sub>), 28.1 (CH<sub>3</sub>), 27.9 (CH<sub>3</sub>), 27.6 (CH<sub>2</sub>), 26.1 (CH<sub>2</sub>), 25.2 (CH<sub>3</sub>), 24.1 (CH<sub>3</sub>). ***cis,syn*-(BB)-2.** *R<sub>f</sub>* (pentane/Et<sub>2</sub>O 1:1): 0.57; <sup>1</sup>H NMR (500 MHz, CD<sub>2</sub>Cl<sub>2</sub>): 3.88 – 3.85 (m, 1H), 3.79 – 3.76 (m, 1H), 2.12 (s, 1H), 2.05 – 1.99 (m, 1H), 1.94 – 1.84 (m, 2H), 1.80 – 1.75 (m, 2H), 1.72 – 1.68 (m, 2H), 1.62 – 1.58 (m, 1H), 1.21(2) (s, 3H), 1.20(6) (s, 3H), 1.17 (s, 3H), 1.10 (s,

3H), 1.07 (s, 3H); <sup>13</sup>C NMR (125 MHz, CD<sub>2</sub>Cl<sub>2</sub>): 87.5 (CH), 84.9 (CH), 84.4 (C), 81.3 (C), 70.6 (C), 39.0 (CH<sub>2</sub>), 35.0 (CH<sub>2</sub>), 28.6 (CH<sub>3</sub>), 28.2 (CH<sub>3</sub>), 28.0 (CH<sub>3</sub>), 27.8 (CH<sub>2</sub>), 26.7 (CH<sub>2</sub>), 24.4 (CH<sub>3</sub>), 23.8 (CH<sub>3</sub>).

**Compounds *trans,anti*-(BB)-2 and *trans,syn*-(BB)-2.**<sup>S7</sup> To a solution of *trans*-1 (243 mg, 1.00 mmol) in CH<sub>2</sub>Cl<sub>2</sub> (4.0 mL) was added AcOH (57.5 μL, 1.00 mmol), then the solution was heated to 40 °C. The reaction was monitored by <sup>1</sup>H NMR spectroscopy and stopped after 48 h when the complete consumption of the starting material was observed. The crude mixture was purified by silica gel column chromatography directly (pentane/Et<sub>2</sub>O 19:1 to 4:1) to give *trans,anti*-(BB)-2 and *trans,syn*-(BB)-2 as light yellow oils. ***trans,anti*-(BB)-2.** *R*<sub>f</sub> (pentane/Et<sub>2</sub>O 1:1): 0.59; <sup>1</sup>H NMR (500 MHz, CD<sub>2</sub>Cl<sub>2</sub>): 4.00 (dd, <sup>3</sup>*J*<sub>H-H</sub> = 8.9, 6.5 Hz, 1H), 3.80 (dd, <sup>3</sup>*J*<sub>H-H</sub> = 7.7, 5.2 Hz, 1H), 3.77 (brs, 1H), 2.12 – 1.99 (m, 2H), 1.97 – 1.85 (m, 2H), 1.79 – 1.67 (m, 2H), 1.63 – 1.56 (m, 1H), 1.55 – 1.47 (m, 1H), 1.23 – 1.21 (m, 6H), 1.16 (s, 3H), 1.11 (s, 3H), 1.01 (s, 3H); <sup>13</sup>C NMR (125 MHz, CD<sub>2</sub>Cl<sub>2</sub>): 86.0 (CH), 85.7 (C), 84.5 (CH), 81.4 (C), 71.9 (C), 38.9 (CH<sub>2</sub>), 31.6 (CH<sub>2</sub>), 29.0 (CH<sub>2</sub>), 28.6 (CH<sub>3</sub>), 28.2 (CH<sub>3</sub>), 28.1 (CH<sub>3</sub>), 26.7 (CH<sub>2</sub>), 25.4 (CH<sub>3</sub>), 24.8 (CH<sub>3</sub>). ***trans,syn*-(BB)-2.** *R*<sub>f</sub> (pentane/Et<sub>2</sub>O 1:1): 0.61; <sup>1</sup>H NMR (400 MHz, CD<sub>2</sub>Cl<sub>2</sub>): 3.90 (t, <sup>3</sup>*J*<sub>H-H</sub> = 7.1 Hz, 1H), 3.74 (t, <sup>3</sup>*J*<sub>H-H</sub> = 7.8 Hz, 1H), 2.02 – 1.88 (m, 2H), 1.83 – 1.77 (m, 2H), 1.76 – 1.66 (m, 3H), 1.65 – 1.58 (m, 1H), 1.55 (brs, 1H), 1.22 (s, 3H), 1.21 (s, 3H), 1.16 (s, 3H), 1.12 (s, 3H), 1.07 (s, 3H); <sup>13</sup>C NMR (100 MHz, CD<sub>2</sub>Cl<sub>2</sub>): 87.3 (CH), 85.0 (C), 84.7 (CH), 81.2 (C), 70.8 (C), 38.9 (CH<sub>2</sub>), 34.2 (CH<sub>2</sub>), 28.8 (CH<sub>3</sub>), 28.2 (CH<sub>2</sub>), 28.1 (CH<sub>3</sub>), 27.8 (CH<sub>3</sub>), 26.8 (CH<sub>2</sub>), 24.3 (CH<sub>3</sub>), 23.8 (CH<sub>3</sub>).

### 3.2. Identification of A-containing products

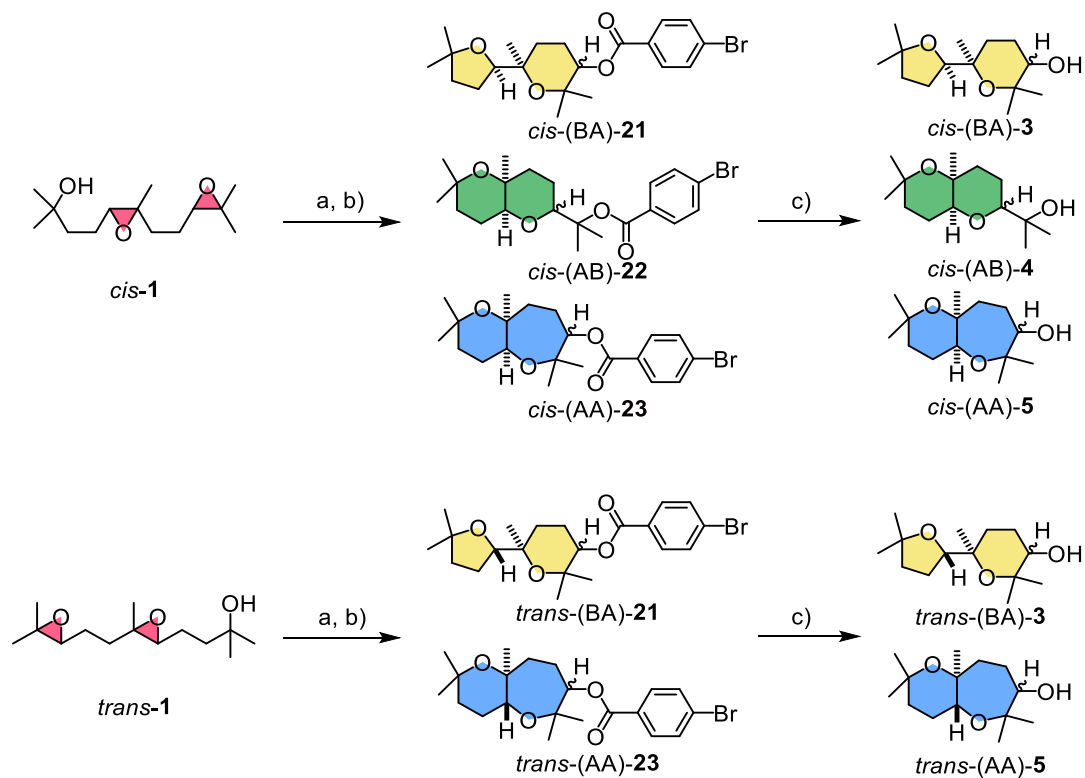

**Scheme S4** (a) **9**,  $CH_2Cl_2$ , rt, 1 h; (b) 4-bromobenzoyl chloride, DMAP,  $Et_3N$ ,  $CH_2Cl_2$ , 0 °C to rt, 72 h; (c)  $K_2CO_3$ ,  $MeOH/CH_2Cl_2$  (1:1), rt, 48 h, 68% (*cis,anti*-(BA)-3), 75% (*cis,syn*-(BA)-3), 76% (*cis,anti*-(AB)-4), 51% (*cis,syn*-(AA)-5), 76% (*trans,anti*-(BA)-3), 74% (*trans,syn*-(BA)-3) and 79% (*trans,syn*-(AA)-5).

**Compounds *cis*-(BA)-21, *cis*-(AB)-22 and *cis*-(AA)-23.** To a solution of *cis*-1 (0.10 g, 0.41 mmol) in  $CH_2Cl_2$  (3.33 mL) was added catalyst **9** (7.85 mg, 10.3  $\mu$ mol) at rt. The reaction was monitored by  $^1H$  NMR spectra and stopped until full consumption of the starting material after 1 h. The resulting solution was cooled down to 0 °C, then  $Et_3N$  (345  $\mu$ L, 2.48 mmol) and DMAP (302 mg, 2.48 mmol) were added to the solution successively, followed by the addition

of 4-bromobenzoyl chloride (906 mg, 4.13 mmol). The reaction was stirred for 72 h, the crude mixture was first purified by silica gel column chromatography (pentane/Et<sub>2</sub>O 19:1 to 3:2) and then further purified with preparative HPLC (CHIRALPAK<sup>®</sup> IA (20 mm  $\phi$  x 250 mmL), 12.8 mL/min, pentane/Et<sub>2</sub>O 19:1) to give *cis,anti*-(BA)-**21**, *cis,syn*-(BA)-**21**, *cis,anti*-(AB)-**22** and *cis,syn*-(AA)-**23** as colorless solids. Structures of *cis,anti*-(AB)-**22** and *cis,syn*-(AA)-**23** were determined by X-ray crystallography (crystal growth conditions: hexane/Et<sub>2</sub>O 10:1, rt). ***cis,anti*-(BA)-21**. *R<sub>f</sub>* (pentane/Et<sub>2</sub>O 6:1): 0.6; <sup>1</sup>H NMR (400 MHz, CD<sub>2</sub>Cl<sub>2</sub>): 7.99 – 7.96 (m, 2H), 7.63 – 7.60 (m, 2H), 4.94 – 4.92 (m, 1H), 3.81 (t, <sup>3</sup>*J*<sub>H-H</sub> = 7.3 Hz, 1H), 2.22 – 2.14 (m, 1H), 1.99 – 1.84 (m, 4H), 1.71 – 1.67 (m, 2H), 1.34 (s, 3H), 1.24(2) (s, 3H), 1.23(5) (s, 3H), 1.21 (s, 3H), 1.16 (s, 3H); <sup>13</sup>C NMR (100 MHz, CD<sub>2</sub>Cl<sub>2</sub>): 165.3 (C), 132.1 (CH), 131.6 (CH), 130.2 (C), 128.2 (C), 87.2 (CH), 81.2 (C), 75.0 (C), 73.5 (CH), 73.3 (C), 38.8 (CH<sub>2</sub>), 28.9 (CH<sub>3</sub>), 28.1 (CH<sub>3</sub>), 27.9 (CH<sub>3</sub>), 27.7 (CH<sub>3</sub>), 26.9 (CH<sub>2</sub>), 24.8 (CH<sub>2</sub>), 23.0 (CH<sub>3</sub>), 21.3 (CH<sub>2</sub>). ***cis,syn*-(BA)-21**. *R<sub>f</sub>* (pentane/Et<sub>2</sub>O 6:1): 0.6; <sup>1</sup>H NMR (500 MHz, CD<sub>2</sub>Cl<sub>2</sub>): 7.89 – 7.86 (m, 2H), 7.62 – 7.59 (m, 2H), 4.80 (dd, <sup>3</sup>*J*<sub>H-H</sub> = 10.8, 4.6 Hz, 1H), 3.75 (t, <sup>3</sup>*J*<sub>H-H</sub> = 7.4 Hz, 1H), 1.98 – 1.77 (m, 5H), 1.69 – 1.66 (m, 2H), 1.53 – 1.47 (m, 1H), 1.39 (s, 3H), 1.23 (s, 3H), 1.22 (s, 3H), 1.20 (s, 3H), 1.18 (s, 3H); <sup>13</sup>C NMR (125 MHz, CD<sub>2</sub>Cl<sub>2</sub>): 164.9 (C), 132.1 (CH), 131.4 (CH), 130.0 (C), 128.2 (C), 86.3 (CH), 81.2 (C), 77.9 (CH), 75.3 (C), 73.6 (C), 38.8 (CH<sub>2</sub>), 30.6 (CH<sub>2</sub>), 30.1 (CH<sub>3</sub>), 28.8 (CH<sub>3</sub>), 28.0 (CH<sub>3</sub>), 27.0 (CH<sub>2</sub>), 23.4 (CH<sub>3</sub>), 22.5 (CH<sub>3</sub>), 22.0 (CH<sub>2</sub>). ***cis,anti*-(AB)-22**. *R<sub>f</sub>* (pentane/Et<sub>2</sub>O 6:1): 0.65; <sup>1</sup>H NMR (500 MHz, CD<sub>2</sub>Cl<sub>2</sub>): 7.86 – 7.83 (m, 2H), 7.57 – 7.55 (m, 2H), 3.70 – 3.58 (m, 1H), 3.32 (dd, <sup>3</sup>*J*<sub>H-H</sub> = 3.7, 2.2 Hz, 1H), 2.05 – 1.95 (m, 1H), 1.93 – 1.85 (m, 1H), 1.82 – 1.71 (m, 2H), 1.66 – 1.62 (m, 1H), 1.60 (s, 3H), 1.57 (s, 3H), 1.44 – 1.39 (m, 2H), 1.25 – 1.21 (m, 4H), 1.18(4) (s, 3H), 1.17(9) (s, 3H); <sup>13</sup>C NMR (125 MHz, CD<sub>2</sub>Cl<sub>2</sub>): 165.0 (C), 131.9 (CH),

131.6 (C), 131.5 (CH), 127.6 (C), 84.8 (C), 81.0 (CH), 74.8 (CH), 71.4 (C), 69.3 (C), 39.2 (CH<sub>2</sub>), 33.6 (CH<sub>3</sub>), 30.5 (CH<sub>2</sub>), 28.5 (CH<sub>3</sub>), 27.0 (CH<sub>3</sub>), 23.1 (CH<sub>3</sub>), 22.9 (CH<sub>2</sub>), 21.8 (CH<sub>3</sub>), 21.7 (CH<sub>2</sub>). ***cis,syn*-(AA)-23**. *R<sub>f</sub>* (pentane/Et<sub>2</sub>O 6:1): 0.55; <sup>1</sup>H NMR (500 MHz, CD<sub>2</sub>Cl<sub>2</sub>): 7.87 – 7.84 (m, 2H), 7.61 – 7.59 (m, 2H), 4.85 (dd, <sup>3</sup>*J*<sub>H-H</sub> = 10.8, 3.4 Hz, 1H), 3.54 (t, <sup>3</sup>*J*<sub>H-H</sub> = 3.6 Hz, 1H), 2.06 – 1.97 (m, 1H), 1.87 – 1.82 (m, 1H), 1.79 – 1.62 (m, 3H), 1.61 – 1.54 (m, 2H), 1.31 – 1.27 (m, 4H), 1.23 (s, 3H), 1.20 (s, 6H), 1.17 (m, 3H); <sup>13</sup>C NMR (125 MHz, CD<sub>2</sub>Cl<sub>2</sub>): 165.1 (C), 132.8 (CH), 131.4 (CH), 130.1 (C), 128.2 (C), 81.7 (CH), 76.8 (C), 76.4 (C), 71.2 (C), 69.4 (CH), 38.7 (CH<sub>2</sub>), 33.3 (CH<sub>3</sub>), 30.2 (CH<sub>3</sub>), 27.8 (CH<sub>3</sub>), 27.1 (CH<sub>3</sub>), 24.9 (CH<sub>2</sub>), 24.7 (CH<sub>2</sub>), 19.3 (CH<sub>3</sub>).

**Compounds *cis*-(BA)-3, *cis*-(AB)-4 and *cis*-(AA)-5.** The above obtained compounds *cis,anti*-(BA)-21, *cis,syn*-(BA)-21, *cis,anti*-(AB)-22 and *cis,syn*-(AA)-23 were dissolved in MeOH/CH<sub>2</sub>Cl<sub>2</sub> (1:1, 25 mM) in separated vials, then corresponding amounts of K<sub>2</sub>CO<sub>3</sub> (5 equiv) were added to each vials and the reactions were stirred at rt. The mixture was stirred at rt and stopped after 48 h when the complete consumption of the starting material was observed. The crude mixture was purified by silica gel column chromatography directly (pentane/Et<sub>2</sub>O 19:1 to 2:1) to give *cis,anti*-(BA)-3 (1.55 mg, 68%), *cis,syn*-(BA)-3 (3.03 mg, 75%), *cis,anti*-(AB)-4 (2.84 mg, 76%) and *cis,syn*-(AA)-5 (1.29 mg, 51%) as light yellow oils. ***cis,anti*-(BA)-3**. *R<sub>f</sub>* (pentane/Et<sub>2</sub>O 1:1): 0.5; <sup>1</sup>H NMR (500 MHz, CD<sub>2</sub>Cl<sub>2</sub>): 3.68 (t, <sup>3</sup>*J*<sub>H-H</sub> = 7.5 Hz, 1H), 3.38 – 3.25 (m, 1H), 2.06 – 1.93 (m, 3H), 1.84 – 1.75 (m, 1H), 1.74 – 1.64 (m, 4H), 1.24 (s, 3H), 1.22 (s, 3H), 1.20 (s, 3H), 1.16 (s, 3H), 1.11 (s, 3H); <sup>13</sup>C NMR (125 MHz, CD<sub>2</sub>Cl<sub>2</sub>): 87.6 (CH), 81.1 (C), 75.8 (C), 73.7 (C), 70.3 (CH), 39.0 (CH<sub>2</sub>), 28.7 (CH<sub>3</sub>), 28.1 (CH<sub>3</sub>), 27.5 (CH<sub>3</sub>), 27.4 (CH<sub>3</sub>), 26.1 (CH<sub>2</sub>), 24.7 (CH<sub>3</sub>), 24.7 (CH<sub>2</sub>), 23.5 (CH<sub>2</sub>). ***cis,syn*-(BA)-3**. *R<sub>f</sub>* (pentane/Et<sub>2</sub>O 1:1): 0.5; <sup>1</sup>H NMR (400 MHz, CD<sub>2</sub>Cl<sub>2</sub>): 3.68 (t, <sup>3</sup>*J*<sub>H-H</sub> = 7.3 Hz, 1H), 3.34 (t, <sup>3</sup>*J*<sub>H-H</sub> = 7.9 Hz, 1H), 1.86 – 1.77 (m,

2H), 1.73 – 1.67 (m, 2H), 1.66 – 1.63 (m, 3H), 1.47 – 1.37 (m, 2H), 1.20 – 1.17 (m, 12H), 1.15 (s, 3H);  $^{13}\text{C}$  NMR (100 MHz,  $\text{CD}_2\text{Cl}_2$ ): 86.6 (CH), 81.1 (C), 75.6 (CH), 75.1 (C), 74.9 (C), 38.8 (CH<sub>2</sub>), 31.2 (CH<sub>2</sub>), 30.1 (CH<sub>3</sub>), 28.8 (CH<sub>3</sub>), 28.0 (CH<sub>3</sub>), 27.0 (CH<sub>2</sub>), 25.4 (CH<sub>2</sub>), 22.3 (CH<sub>3</sub>), 21.8 (CH<sub>3</sub>). ***cis,anti*-(AB)-4**.  $R_f$  (pentane/Et<sub>2</sub>O 1:1): 0.6;  $^1\text{H}$  NMR (400 MHz,  $\text{CD}_2\text{Cl}_2$ ): 3.31 (dd,  $^3J_{\text{H-H}} = 3.7, 2.2$  Hz, 1H), 3.09 (dd,  $^3J_{\text{H-H}} = 11.5, 1.8$  Hz, 1H), 2.61 (brs, 1H), 2.09 – 1.95 (m, 1H), 1.91 – 1.81 (m, 1H), 1.79 – 1.72 (m, 1H), 1.72 – 1.64 (m, 1H), 1.62 – 1.56 (m, 1H), 1.39 – 1.28 (m, 3H), 1.23 (s, 3H), 1.17 (s, 3H), 1.15 (s, 3H), 1.14 (s, 3H), 1.11 (s, 3H);  $^{13}\text{C}$  NMR (100 MHz,  $\text{CD}_2\text{Cl}_2$ ): 83.6 (CH), 74.6 (CH), 72.2 (C), 71.4 (C), 69.3 (C), 39.2 (CH<sub>2</sub>), 33.6 (CH<sub>3</sub>), 30.5 (CH<sub>2</sub>), 28.5 (CH<sub>3</sub>), 27.0 (CH<sub>3</sub>), 25.8 (CH<sub>3</sub>), 24.0 (CH<sub>3</sub>), 22.9 (CH<sub>2</sub>), 22.3 (CH<sub>2</sub>). ***cis,syn*-(AA)-5**.  $R_f$  (pentane/Et<sub>2</sub>O 1:1): 0.4;  $^1\text{H}$  NMR (400 MHz,  $\text{CD}_2\text{Cl}_2$ ): 3.44 – 3.35 (m, 2H), 2.04 – 1.89 (m, 1H), 1.74 – 1.63 (m, 2H), 1.63 – 1.56 (m, 3H), 1.53 – 1.38 (m, 3H), 1.25 (s, 3H), 1.18 – 1.15 (m, 6H), 1.13 (s, 3H), 1.11 (s, 3H);  $^{13}\text{C}$  NMR (100 MHz,  $\text{CD}_2\text{Cl}_2$ ): 80.5 (CH), 77.6 (C), 77.0 (C), 71.9 (C), 68.9 (CH), 39.2 (CH<sub>2</sub>), 33.3 (CH<sub>3</sub>), 30.4 (CH<sub>3</sub>), 30.3 (CH<sub>2</sub>), 28.6 (CH<sub>2</sub>), 27.6 (CH<sub>3</sub>), 27.0 (CH<sub>3</sub>), 24.9 (CH<sub>2</sub>), 17.8 (CH<sub>3</sub>).

**Compounds *trans,anti*-(AA)-5,<sup>S8</sup> *trans*-(BA)-21 and *trans*-(AA)-23.** To a solution of *trans*-**1** (0.10 g, 0.41 mmol) in  $\text{CH}_2\text{Cl}_2$  (3.33 mL) was added catalyst **9** (7.85 mg, 10.3  $\mu\text{mol}$ ) at rt. The reaction was monitored by  $^1\text{H}$  NMR spectroscopy and stopped after 1 h when the complete consumption of the starting material was observed. The crude mixture was first purified by silica gel column chromatography (pentane/Et<sub>2</sub>O 19:1 to 3:2) to give *trans,anti*-(AA)-**5** as colorless solid and inseparable mixture of *trans*-(BA)-**3** and *trans*-(AA)-**4**. The mixture was dissolved in  $\text{CH}_2\text{Cl}_2$  (3 mL) and cooled down to 0 °C, then Et<sub>3</sub>N (345  $\mu\text{L}$ , 2.48 mmol) and DMAP (302 mg, 2.48 mmol) were added to the solution successively, followed by



the addition of 4-bromobenzoyl chloride (906 mg, 4.13 mmol). The reaction was stirred for 72 h, the crude mixture was first purified by silica gel column chromatography (pentane/Et<sub>2</sub>O 19:1 to 3:2) and then was further purified with preparative HPLC (CHIRALPAK<sup>®</sup> IA (20 mm  $\varnothing$  x 250 mmL), 12.8 mL/min, pentane/Et<sub>2</sub>O 19:1) to give *trans,anti*-(BA)-**21**, *trans,syn*-(BA)-**21** and *trans,syn*-(AA)-**23** as colorless solids. Structures of *trans,anti*-(AA)-**5**, *trans,anti*-(BA)-**21**, *trans,syn*-(BA)-**21** and *trans,syn*-(AA)-**23** were determined by X-ray crystallography (crystal growth conditions: hexane/Et<sub>2</sub>O = 10:1, rt). ***trans,anti*-(AA)-5**. *R<sub>f</sub>* (pentane/Et<sub>2</sub>O 1:1): 0.4; <sup>1</sup>H NMR (500 MHz, CD<sub>2</sub>Cl<sub>2</sub>): 3.77 (d, <sup>3</sup>*J*<sub>H-H</sub> = 6.3 Hz, 1H), 3.59 (dd, <sup>3</sup>*J*<sub>H-H</sub> = 11.6, 4.5 Hz, 1H), 1.81 – 1.71 (m, 3H), 1.67 (brs, 1H), 1.62 – 1.56 (m, 2H), 1.54 – 1.44 (m, 2H), 1.39 – 1.35 (m, 1H), 1.23 (s, 3H), 1.22 (s, 3H), 1.18 (s, 3H), 1.11 (s, 3H), 1.06 (s, 3H); <sup>13</sup>C NMR (125 MHz, CD<sub>2</sub>Cl<sub>2</sub>): 78.4 (C), 77.0 (C), 76.7 (CH), 73.8 (CH), 71.2 (C), 37.7 (CH<sub>2</sub>), 36.7 (CH<sub>2</sub>), 33.4 (CH<sub>3</sub>), 28.9 (CH<sub>3</sub>), 27.4 (CH<sub>3</sub>), 25.9 (CH<sub>2</sub>), 25.5 (CH<sub>2</sub>), 22.3 (CH<sub>3</sub>), 20.2(CH<sub>3</sub>). ***trans,anti*-(BA)-21**. *R<sub>f</sub>* (pentane/Et<sub>2</sub>O 6:1): 0.6; <sup>1</sup>H NMR (500 MHz, CD<sub>2</sub>Cl<sub>2</sub>): 7.95 – 7.93 (m, 2H), 7.63 – 7.60 (m, 2H), 4.93 – 4.91 (m, 1H), 3.89 (t, <sup>3</sup>*J*<sub>H-H</sub> = 7.2 Hz, 1H), 2.15 – 2.08 (m, 1H), 2.02 – 1.93 (m, 2H), 1.92 – 1.84 (m, 2H), 1.73 – 1.63 (m, 2H), 1.42 – 1.37 (m, 1H), 1.31 (s, 3H), 1.23 (s, 3H), 1.21 (s, 3H), 1.18 (s, 3H), 1.16 (s, 3H); <sup>13</sup>C NMR (125 MHz, CD<sub>2</sub>Cl<sub>2</sub>): 165.3 (C), 132.1 (CH), 131.5 (CH), 130.1 (C), 128.2 (C), 85.6 (CH), 81.3 (C), 75.0 (C), 74.1 (CH), 73.3 (C), 38.8 (CH<sub>2</sub>), 28.7 (CH<sub>3</sub>), 28.3 (CH<sub>3</sub>), 27.8 (CH<sub>3</sub>), 27.6 (CH<sub>2</sub>), 27.1 (CH<sub>3</sub>), 27.0 (CH<sub>2</sub>), 22.3 (CH<sub>3</sub>), 21.3 (CH<sub>2</sub>). ***trans,syn*-(BA)-21**. *R<sub>f</sub>* (pentane/Et<sub>2</sub>O 6:1): 0.6; <sup>1</sup>H NMR (500 MHz, CD<sub>2</sub>Cl<sub>2</sub>): 7.89 – 7.87 (m, 2H), 7.62 – 7.59 (m, 2H), 4.82 (dd, <sup>3</sup>*J*<sub>H-H</sub> = 10.2, 4.3 Hz, 1H), 3.79 (t, <sup>3</sup>*J*<sub>H-H</sub> = 7.1 Hz, 1H), 2.00 – 1.84 (m, 4H), 1.71 – 1.61 (m, 4H), 1.35 (s, 3H), 1.23 (s, 3H), 1.20 (s, 3H), 1.18 (s, 3H), 1.17 (s, 3H); <sup>13</sup>C NMR (125 MHz, CD<sub>2</sub>Cl<sub>2</sub>): 165.4 (C), 132.8 (CH), 131.4 (CH), 130.0 (C), 128.2 (C), 85.7 (CH),

81.3 (C), 77.3 (CH), 75.0 (C), 73.5 (C), 38.8 (CH<sub>2</sub>), 32.2 (CH<sub>2</sub>), 29.9 (CH<sub>3</sub>), 28.7 (CH<sub>3</sub>), 27.8 (CH<sub>3</sub>), 27.0 (CH<sub>2</sub>), 24.1 (CH<sub>3</sub>), 21.9 (CH<sub>2</sub>), 21.5 (CH<sub>3</sub>). **trans,syn-(AA)-23**. *R<sub>f</sub>* (pentane/Et<sub>2</sub>O 6:1): 0.55; <sup>1</sup>H NMR (400 MHz, CD<sub>2</sub>Cl<sub>2</sub>): 7.88 – 7.85 (m, 2H), 7.62 – 7.59 (m, 2H), 5.13 (dd, <sup>3</sup>J<sub>H-H</sub> = 10.8, 1.2 Hz, 1H), 3.36 (dd, <sup>3</sup>J<sub>H-H</sub> = 11.6, 4.5 Hz, 1H), 2.02 – 1.92 (m, 1H), 1.79 – 1.55 (m, 7H), 1.25 (s, 3H), 1.24 (s, 3H), 1.22 (s, 6H), 1.13 (s, 3H); <sup>13</sup>C NMR (100 MHz, CD<sub>2</sub>Cl<sub>2</sub>): 165.3 (C), 132.1 (CH), 131.4 (CH), 129.9 (C), 128.3 (C), 80.9 (CH), 76.3 (C), 76.3 (C), 73.7 (CH), 71.4 (C), 42.6 (CH<sub>2</sub>), 37.8 (CH<sub>2</sub>), 33.4 (CH<sub>3</sub>), 27.8 (CH<sub>3</sub>), 26.8 (CH<sub>2</sub>), 25.2 (CH<sub>2</sub>), 25.0 (CH<sub>3</sub>), 23.3 (CH<sub>3</sub>), 20.6 (CH<sub>3</sub>).

**Compounds trans-(BA)-3, and trans-(AA)-5.** The above obtained compounds *trans,anti*-(BA)-**21**, *trans,syn*-(BA)-**21** and *trans,syn*-(AA)-**23** were dissolved in MeOH/CH<sub>2</sub>Cl<sub>2</sub> (1:1, 25 mM) in separated vials, then corresponding amounts of K<sub>2</sub>CO<sub>3</sub> (5 equiv) were added to each vials and the reactions were stirred at rt. The mixture was stirred at rt and stopped after 48 h when the complete consumption of the starting material was observed. The crude mixture was purified by silica gel column chromatography directly (pentane/Et<sub>2</sub>O 19:1 to 2:1) to give *trans,anti*-(BA)-**3** (3.26 mg, 76%), *trans,syn*-(BA)-**3** (3.95 mg, 74%) and *trans,syn*-(AA)-**5** (4.5 mg, 79%) as light yellow oils. **trans,anti-(BA)-3**. *R<sub>f</sub>* (pentane/Et<sub>2</sub>O 1:1): 0.4; <sup>1</sup>H NMR (500 MHz, CD<sub>2</sub>Cl<sub>2</sub>): 3.89 (t, <sup>3</sup>J<sub>H-H</sub> = 7.4 Hz, 1H), 3.36 (dd, <sup>3</sup>J<sub>H-H</sub> = 5.8, 3.0 Hz, 1H), 1.97 – 1.78 (m, 4H), 1.73 – 1.55 (m, 4H), 1.35 – 1.30 (m, 1H), 1.23 (s, 3H), 1.22 (s, 3H), 1.19 (s, 3H), 1.13 (s, 3H), 1.10 (s, 3H); <sup>13</sup>C NMR (125 MHz, CD<sub>2</sub>Cl<sub>2</sub>): 85.0 (CH), 81.3 (C), 74.8 (C), 74.7 (C), 71.4 (CH), 38.8 (CH<sub>2</sub>), 28.6 (CH<sub>3</sub>), 28.3 (CH<sub>3</sub>), 27.8 (CH<sub>3</sub>), 27.0 (CH<sub>2</sub>), 26.4 (CH<sub>2</sub>), 26.2 (CH<sub>2</sub>), 24.1 (CH<sub>3</sub>), 24.0 (CH<sub>3</sub>). **trans,syn-(BA)-3**. *R<sub>f</sub>* (pentane/Et<sub>2</sub>O 1:1): 0.4; <sup>1</sup>H NMR (500 MHz, CD<sub>2</sub>Cl<sub>2</sub>): 3.67 (t, <sup>3</sup>J<sub>H-H</sub> = 7.1 Hz, 1H), 3.34 (dd, <sup>3</sup>J<sub>H-H</sub> = 10.2, 5.2 Hz, 1H), 1.92 – 1.83 (m, 2H), 1.76 – 1.67

(m, 2H), 1.66 – 1.58 (m, 3H), 1.55 – 1.49 (m, 1H), 1.46 (brs, 1H), 1.21 (s, 3H), 1.18 (s, 3H), 1.16 (s, 6H), 1.13 (s, 3H);  $^{13}\text{C}$  NMR (125 MHz,  $\text{CD}_2\text{Cl}_2$ ): 86.4 (CH), 81.1 (C), 75.3 (CH), 75.0 (C), 74.6 (C), 38.7 ( $\text{CH}_2$ ), 33.2 ( $\text{CH}_2$ ), 30.0 ( $\text{CH}_3$ ), 28.7 ( $\text{CH}_3$ ), 27.8 ( $\text{CH}_3$ ), 27.0 ( $\text{CH}_2$ ), 25.3 ( $\text{CH}_2$ ), 22.4 ( $\text{CH}_3$ ), 21.1 ( $\text{CH}_3$ ). ***trans,syn*-(AA)-5**.  $R_f$  (pentane/ $\text{Et}_2\text{O}$  1:1): 0.4;  $^1\text{H}$  NMR (500 MHz,  $\text{CD}_2\text{Cl}_2$ ): 3.73 (d,  $^3J_{\text{H-H}} = 9.8$  Hz, 1H), 3.19 (dd,  $^3J_{\text{H-H}} = 11.6, 4.5$  Hz, 1H), 1.92 – 1.80 (m, 1H), 1.73 – 1.57 (m, 3H), 1.54 – 1.42 (m, 4H), 1.25 (s, 3H), 1.21 (s, 3H), 1.17 (d,  $^4J_{\text{H-H}} = 1.2$  Hz, 3H), 1.10 (s, 3H), 1.04 (s, 3H);  $^{13}\text{C}$  NMR (125 MHz,  $\text{CD}_2\text{Cl}_2$ ): 79.2 (CH), 77.4 (C), 76.4 (C), 73.2 (CH), 71.3 (C), 44.2 ( $\text{CH}_2$ ), 37.8 ( $\text{CH}_2$ ), 33.4 ( $\text{CH}_3$ ), 30.3 ( $\text{CH}_3$ ), 27.3 ( $\text{CH}_3$ ), 25.3 ( $\text{CH}_2$ ), 25.2 ( $\text{CH}_2$ ), 22.0 ( $\text{CH}_3$ ), 20.6 ( $\text{CH}_3$ ).

### 3.3. Identification of products with acyclic and rearrangement motifs

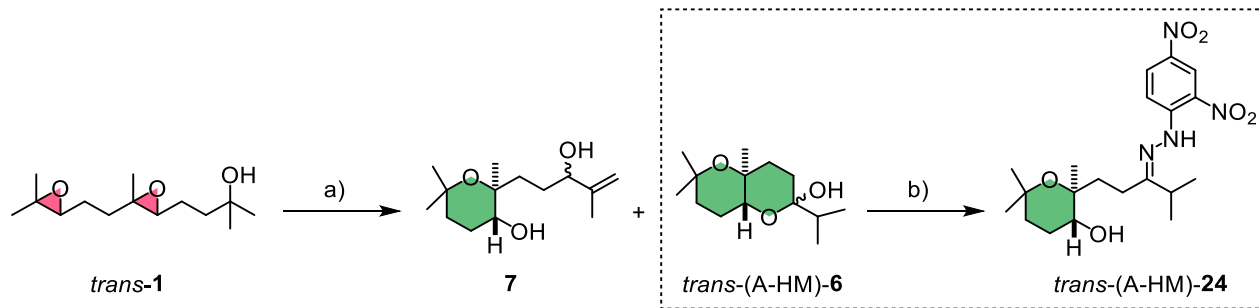

**Scheme S5** (a) **8**, CHCl<sub>3</sub>, rt, 7 days; (b) 2,4-dinitrophenylhydrazine, AcOH, EtOH, reflux, 12 h.

**Compounds *trans*-(A-HM)-6, 7 and *trans*-(A-HM)-24.** To a solution of *trans*-1 (0.10 g, 0.41 mmol) in CHCl<sub>3</sub> (12.4 mL) was added capsule monomer **11** (274 mg, 0.250 mmol, capsule catalyst **8** was self-assembled from six molecules of **11** in the solution) at rt. The mixture was stirred at rt and stopped after 7 days when the complete consumption of the starting material was observed. The crude mixture was purified by silica gel column chromatography directly (pentane/Et<sub>2</sub>O 19:1 to 1:2) to give *trans*-(A-HM)-6 and **7** as light yellow oils. The isolated *trans*-(A-HM)-6 was dissolved in EtOH (6.0 mL), then 2,4-dinitrophenylhydrazine (818 mg, 4.13 mmol) and AcOH (236  $\mu$ L, 4.13 mmol) were added to the solution successively. The reaction mixture was refluxed for 12 h, the crude mixture was purified by silica gel column chromatography (pentane/Et<sub>2</sub>O 19:1 to 2:3) to give *trans*-(A-HM)-24 as yellow oil. ***trans*-(A-HM)-6.** *R*<sub>f</sub> (pentane/Et<sub>2</sub>O 1:1): 0.35; <sup>1</sup>H NMR (500 MHz, CD<sub>2</sub>Cl<sub>2</sub>): 3.44 – 3.41 (m, 1H), 2.24 (brs, 1H), 2.07 – 1.97 (m, 2H), 1.77 – 1.73 (m, 2H), 1.66 – 1.63 (m, 1H), 1.55 – 1.44 (m, 4H), 1.39 (s, 3H), 1.20 – 1.18 (m, 6H), 0.98 (d, <sup>3</sup>*J*<sub>H-H</sub> = 7.0 Hz, 3H), 0.97(6) (d, <sup>3</sup>*J*<sub>H-H</sub> = 7.0 Hz, 3H); <sup>13</sup>C NMR (125 MHz, CD<sub>2</sub>Cl<sub>2</sub>): 112.4 (C), 86.5 (C), 85.9 (CH), 69.5 (C), 41.9 (CH<sub>2</sub>), 33.6 (CH<sub>2</sub>),

31.7 (CH), 30.2 (CH<sub>3</sub>), 29.7 (CH<sub>2</sub>), 29.0 (CH<sub>3</sub>), 26.5 (CH<sub>2</sub>), 17.9 (CH<sub>3</sub>), 17.8 (CH<sub>3</sub>), 17.5 (CH<sub>3</sub>).  
**7** (d.r. 59:41). *R<sub>f</sub>* (pentane/Et<sub>2</sub>O 1:1): 0.2; <sup>1</sup>H NMR (400 MHz, CD<sub>2</sub>Cl<sub>2</sub>): 5.00 – 4.96 (m, 1H),  
4.79 – 4.77 (m, 1H), 4.38 – 4.31 (m, 1H), 3.50 – 3.47 (m, 1H), 2.15 – 2.02 (m, 2H), 1.84 – 1.50  
(m, 8H), 1.42 – 1.32 (m, 1H), 1.20 (s, 6H), 1.18 – 1.16 (m, 3H); <sup>13</sup>C NMR (100 MHz, CD<sub>2</sub>Cl<sub>2</sub>):  
146.7 (C), 146.1 (C), 110.1 (CH<sub>2</sub>), 86.7 (C), 86.5 (C), 84.3 (CH), 81.1 (CH), 77.7(0) (CH),  
77.6(8) (CH), 70.6(2) (C), 70.5(7) (C), 41.5 (CH<sub>2</sub>), 41.4 (CH<sub>2</sub>), 32.1 (CH<sub>2</sub>), 32.0 (CH<sub>2</sub>), 31.9  
(CH<sub>2</sub>), 31.8 (CH<sub>2</sub>), 30.0 (CH<sub>3</sub>), 29.3(3) (CH<sub>3</sub>), 29.3(0) (CH<sub>3</sub>), 26.6 (CH<sub>2</sub>), 24.1 (CH<sub>3</sub>), 22.9  
(CH<sub>3</sub>), 18.4 (CH<sub>3</sub>), 18.0 (CH<sub>3</sub>). ***trans*-(A-HM)-24**. *R<sub>f</sub>* (Et<sub>2</sub>O/pentane 2:1): 0.4; <sup>1</sup>H NMR (400  
MHz, CD<sub>2</sub>Cl<sub>2</sub>): 11.16 (s, 1H), 9.07 (d, <sup>4</sup>*J*<sub>H-H</sub> = 2.6 Hz, 1H), 8.27 (dd, <sup>3</sup>*J*<sub>H-H</sub> = 9.7 Hz, <sup>4</sup>*J*<sub>H-H</sub> = 2.7  
Hz, 1H), 7.99 (d, <sup>3</sup>*J*<sub>H-H</sub> = 9.7 Hz, 1H), 3.45 (d, <sup>3</sup>*J*<sub>H-H</sub> = 10.3 Hz, 1H), 2.73 – 2.65 (m, 2H), 2.53 –  
2.45 (m, 1H), 1.93 – 1.80 (m, 1H), 1.72 – 1.56 (m, 4H), 1.48 – 1.39 (m, 1H), 1.25 – 1.21 (m,  
15H); <sup>13</sup>C NMR (100 MHz, CD<sub>2</sub>Cl<sub>2</sub>): 167.1 (C), 146.0 (C), 137.9 (C), 130.2 (CH), 129.4 (C),  
123.8 (CH), 117.0 (CH), 79.6 (CH), 74.3 (C), 71.3 (C), 41.2 (CH<sub>2</sub>), 36.9 (CH), 31.2 (CH<sub>2</sub>), 30.6  
(CH<sub>3</sub>), 29.0 (CH<sub>3</sub>), 26.6 (CH<sub>2</sub>), 23.4 (CH<sub>2</sub>), 22.9 (CH<sub>3</sub>), 20.4 (CH<sub>3</sub>), 20.3 (CH<sub>3</sub>).

## 4. Catalysis

### 4.1. Catalysis with *cis* diepoxide substrates

**Table S1** Catalyst comparison on the diepoxide substrates *cis*-**1**, *cis,syn*-**1** and *cis,anti*-**1**<sup>a</sup>

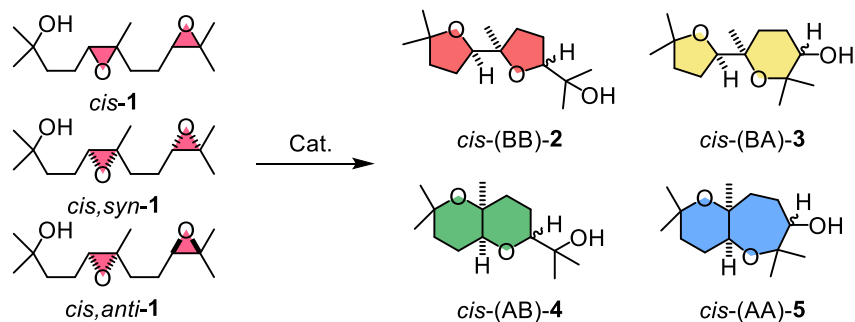

| Entry | Sub <sup>b</sup>           | Cat (mol%) <sup>c</sup> | <i>T</i> (°C) <sup>d</sup> | <i>t</i> <sup>e</sup> | $\eta_t$ (%) <sup>f</sup> | BB:BA:AB:AA <sup>g</sup> |
|-------|----------------------------|-------------------------|----------------------------|-----------------------|---------------------------|--------------------------|
| 1     | <i>cis</i> - <b>1</b>      | AcOH (500)              | 40                         | 2 d                   | >95                       | 88:11:1:0                |
| 2     | <i>cis,syn</i> - <b>1</b>  | AcOH (500)              | 40                         | 2 d                   | >95                       | 83:16:1:0                |
| 3     | <i>cis,anti</i> - <b>1</b> | AcOH (500)              | 40                         | 2 d                   | >95                       | 94:5:1:0 <sup>h</sup>    |
| 4     | <i>cis</i> - <b>1</b>      | <b>8</b> (10)           | 30                         | 7 d                   | >95                       | 51:43:4:2                |
| 5     | <i>cis,syn</i> - <b>1</b>  | <b>8</b> (10)           | 30                         | 7 d                   | >95                       | 41:57:0:2                |
| 6     | <i>cis,anti</i> - <b>1</b> | <b>8</b> (10)           | 30                         | 7 d                   | >95                       | 62:27:9:2 <sup>h</sup>   |
| 7     | <i>cis</i> - <b>1</b>      | <b>9</b> (2.5)          | rt                         | 1 h                   | >95                       | 2:56:31:11               |
| 8     | <i>cis,syn</i> - <b>1</b>  | <b>9</b> (2.5)          | rt                         | 1 h                   | >95                       | 2:79:0:19                |
| 9     | <i>cis,anti</i> - <b>1</b> | <b>9</b> (2.5)          | rt                         | 1 h                   | >95                       | 0:29:67:2 <sup>h</sup>   |
| 10    | <i>cis,anti</i> - <b>1</b> | <b>9</b> (2.5)          | rt                         | 1 h                   | >95                       | 3:39:58:0                |

**Table S1 (continued)** Catalyst comparison on the diepoxide substrates *cis*-**1**, *cis,syn*-**1** and *cis,anti*-**1**<sup>a</sup>

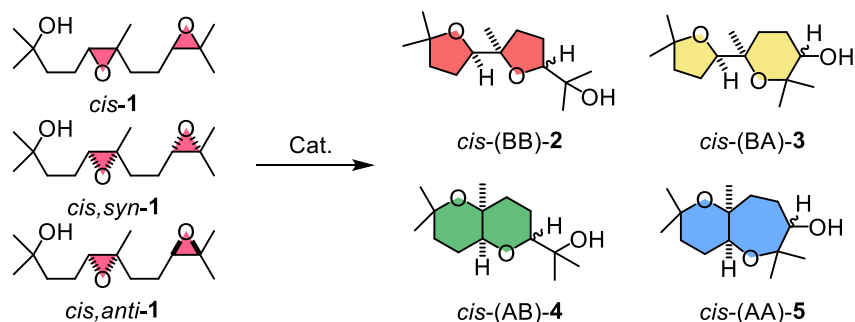

| Entry | Sub <sup>b</sup>           | Cat (mol%) <sup>c</sup> | T (°C) <sup>d</sup> | t <sup>e</sup> | η <sub>t</sub> (%) <sup>f</sup> | BB:BA:AB:AA <sup>g</sup> |
|-------|----------------------------|-------------------------|---------------------|----------------|---------------------------------|--------------------------|
| 11    | <i>cis</i> - <b>1</b>      | <b>10</b> (10)          | rt                  | 8 d            | >95                             | 79:17:3:1                |
| 12    | <i>cis,syn</i> - <b>1</b>  | <b>10</b> (10)          | rt                  | 8 d            | >95                             | 86:14:0:0                |
| 13    | <i>cis,anti</i> - <b>1</b> | <b>10</b> (10)          | rt                  | 8 d            | >95                             | 71:21:7:1 <sup>h</sup>   |

<sup>a</sup>Reaction conditions and data are indicated in the table. <sup>b</sup>Substrates. <sup>c</sup>Catalysts (Figure S1). In parenthesis, catalyst concentration in mol% relative to concentration of di-epoxide substrates. <sup>d</sup>Reaction temperature; rt: room temperature. <sup>e</sup>Reaction time. <sup>f</sup>Substrate conversion, in percent, from <sup>1</sup>H NMR spectra of product mixtures. <sup>g</sup>Selectivities were obtained from GC-FID analysis and the corresponding substrate was indicated in parenthesis. <sup>h</sup>Results for *cis,anti* isomer **1** are calculated (from data for the other diastereomer and the mixture of diastereomers in the respective series)

#### 4.1.1. Brønsted-acid catalyst AcOH

To a solution of *cis* diepoxide substrates (125 mM) in CD<sub>2</sub>Cl<sub>2</sub> was added AcOH (500 mol%), then the mixture was stirred at 40 °C. The reaction was monitored by <sup>1</sup>H NMR spectroscopy and stopped after 2 days when full consumption of the starting material was observed. An aliquot (50 μL) of the resulting solution was filtered over a filter tip using diethyl ether as the eluent and the resulting sample was subjected to GC-FID analysis (Conditions are described in the Materials and methods section).

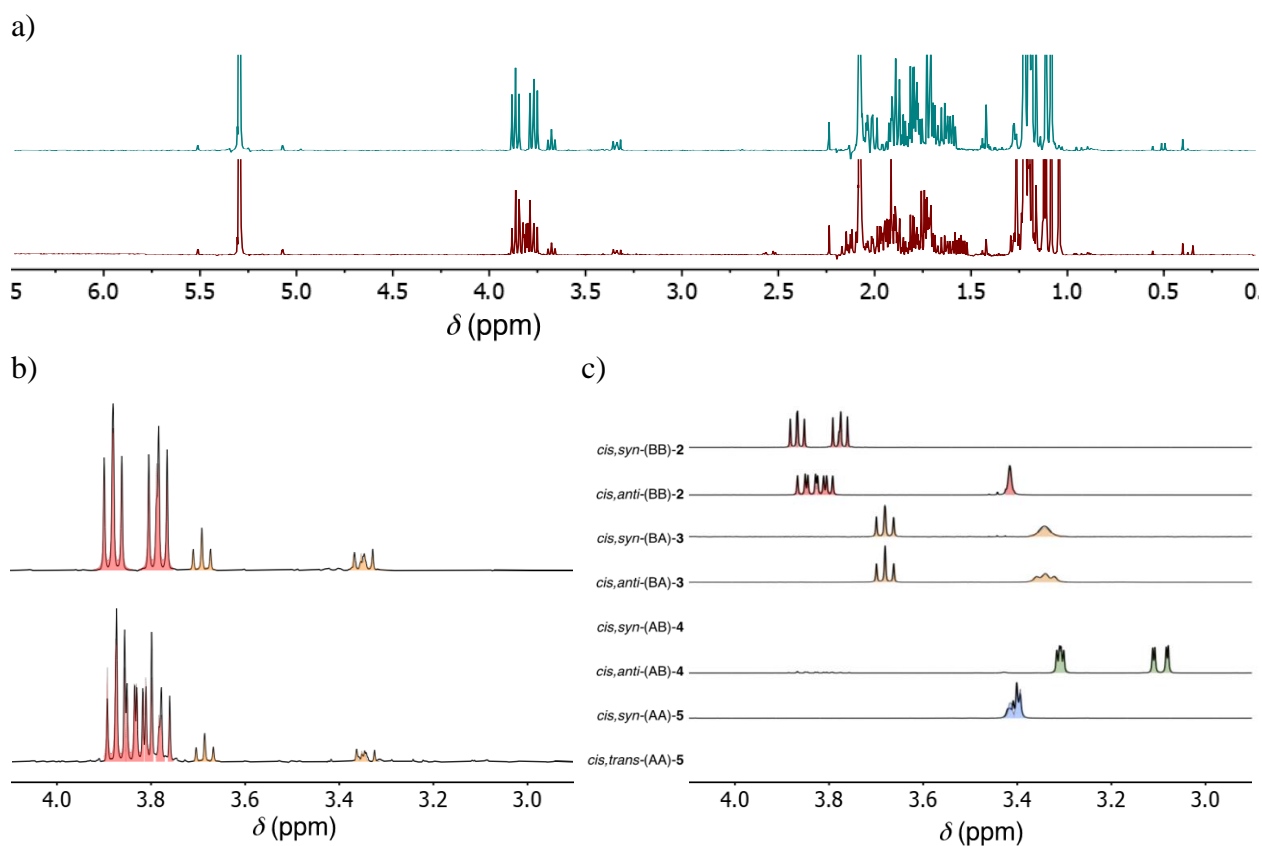

**Figure S4.** Crude <sup>1</sup>H NMR spectra analysis of the epoxide-opening cascade cyclization of *cis*-1 (bottom) and *cis,syn*-1 (top) catalyzed by AcOH. a) Full <sup>1</sup>H NMR spectra. b) Zoomed <sup>1</sup>H NMR spectra. c) Decoded NMR fingerprint region for products of *cis* diepoxide substrates.



a)

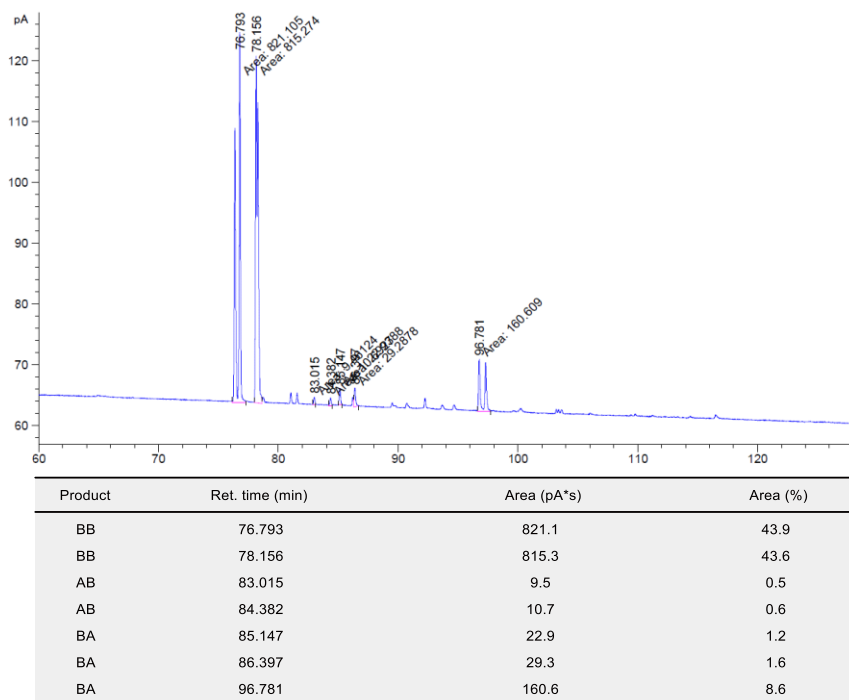

b)

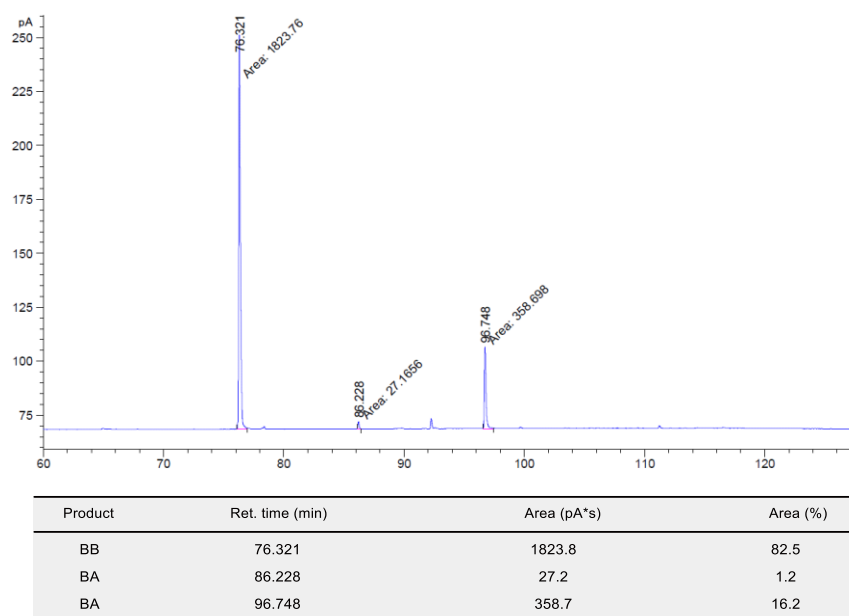

**Figure S5.** GC analysis of epoxides a) *cis*-1 and b) *cis,syn*-1 opening catalyzed by AcOH.

### 4.1.2. $\pi$ -Basic capsule catalyst **8**

To a solution of *cis* diepoxide substrates (33.3 mM) in  $\text{CHCl}_3$  (Pre-treated as described in the Materials and methods section) was added capsule monomer **11** (60 mol%, capsule catalyst **8** was self-assembled from six molecules of **11** in the solution). The mixture was stirred at rt and stopped after 7 days when the complete consumption of the starting material was observed. An aliquot (100  $\mu\text{L}$ ) of the resulting solution was filtered over a filter tip using diethyl ether as the eluent and the resulting sample was subjected to GC-FID analysis (Conditions are described in the Materials and methods section). Then the resulting GC sample was subjected to  $^1\text{H}$  NMR spectroscopy analysis.

a)

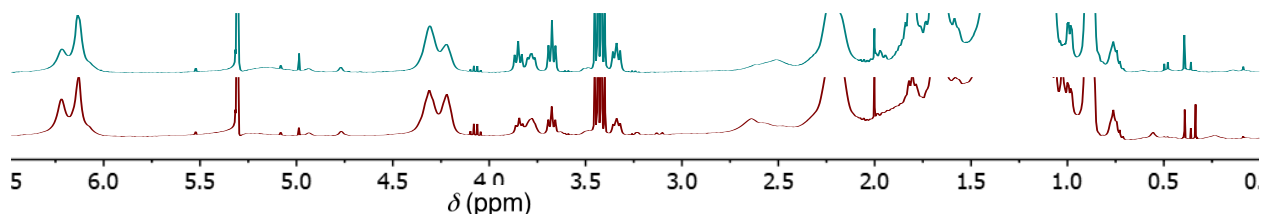

b)

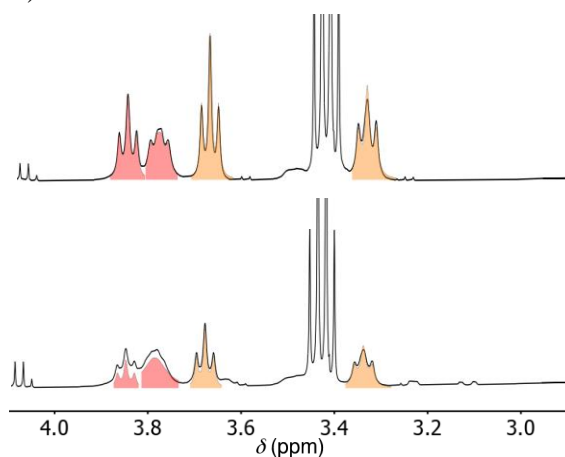

c)

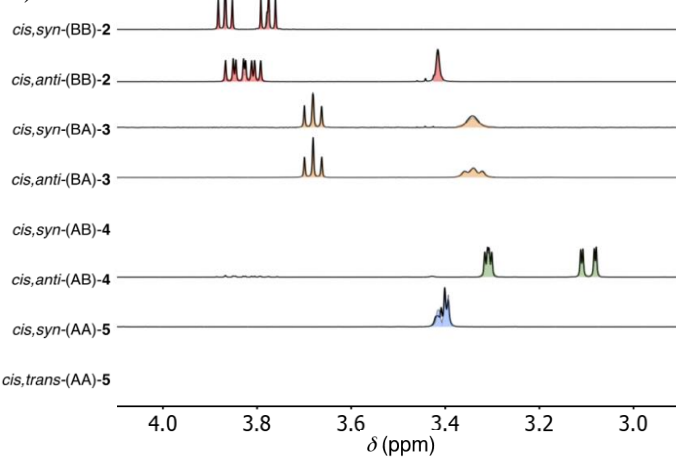

**Figure S6.** Crude  $^1\text{H}$  NMR spectra analysis of the epoxide-opening cascade cyclization of *cis*-**1** (bottom) and *cis,syn*-**1** (top) catalyzed by capsule catalyst **8**. a) Full  $^1\text{H}$  NMR spectra. b) Zoomed  $^1\text{H}$  NMR spectra. c) Decoded NMR fingerprint region for products of *cis* diepoxide substrates.

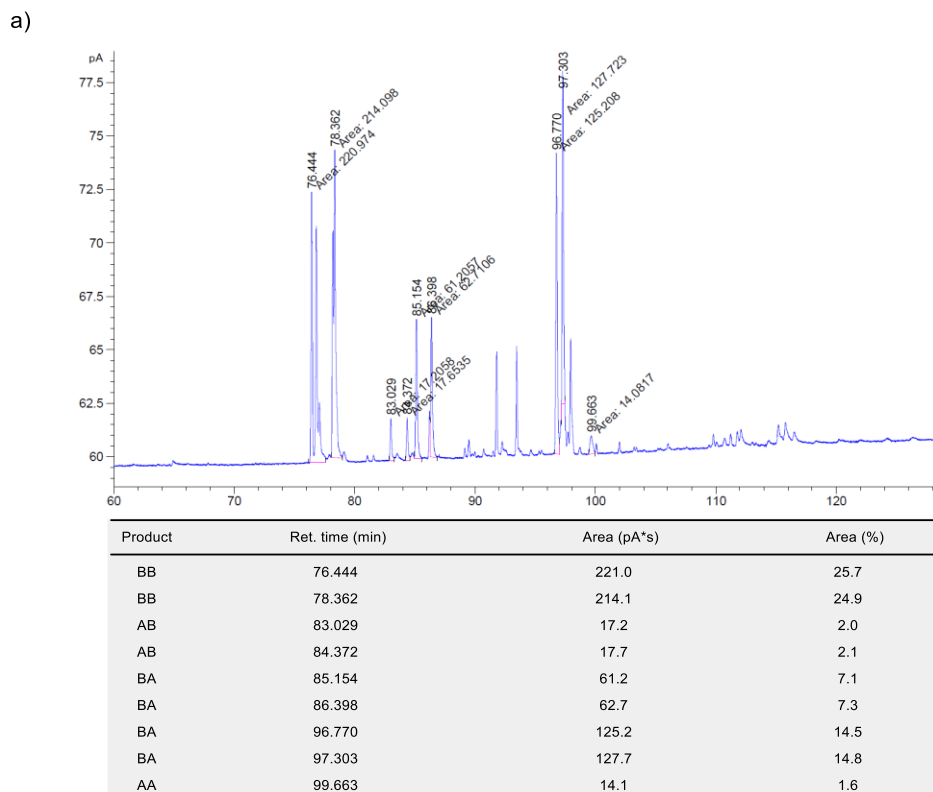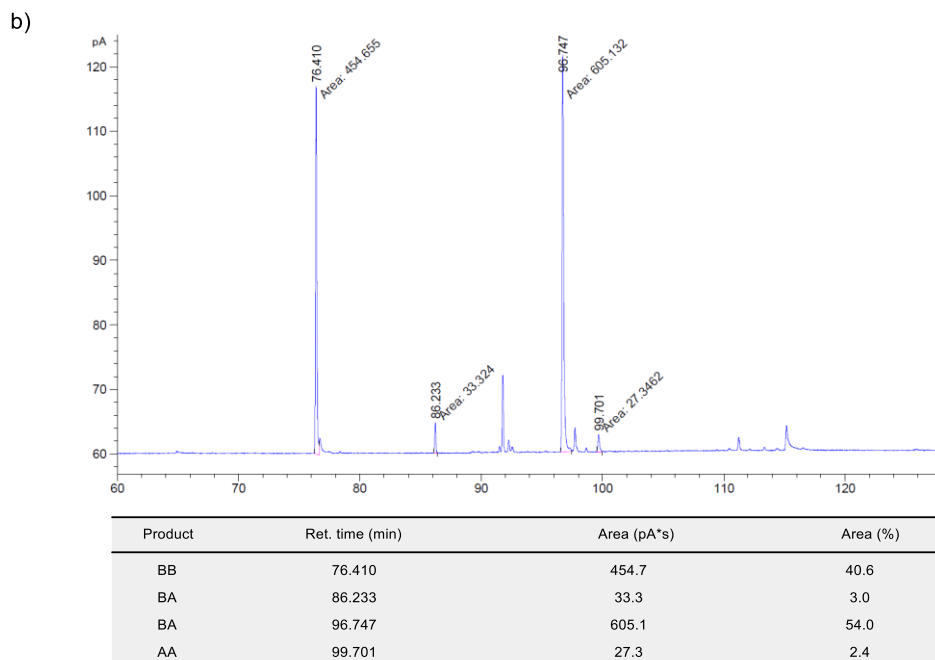

**Figure S7.** GC analysis of epoxides a) *cis*-1 and b) *cis,syn*-1 opening catalyzed by capsule catalyst **8**.

### 4.1.3. Pnictogen-bonding catalyst **9**

To a solution of *cis* diepoxide substrates (125 mM) in CD<sub>2</sub>Cl<sub>2</sub> was added catalyst **9** (2.5 mol%), then the mixture was stirred at rt. The reaction was monitored by <sup>1</sup>H NMR spectroscopy and stopped after 1 h when the complete consumption of the starting material was observed. An aliquot (50 μL) of the resulting solution was filtered over a filter tip using diethyl ether as the eluent and the resulting sample was subjected to GC-FID analysis (Conditions are described in the Materials and methods section).

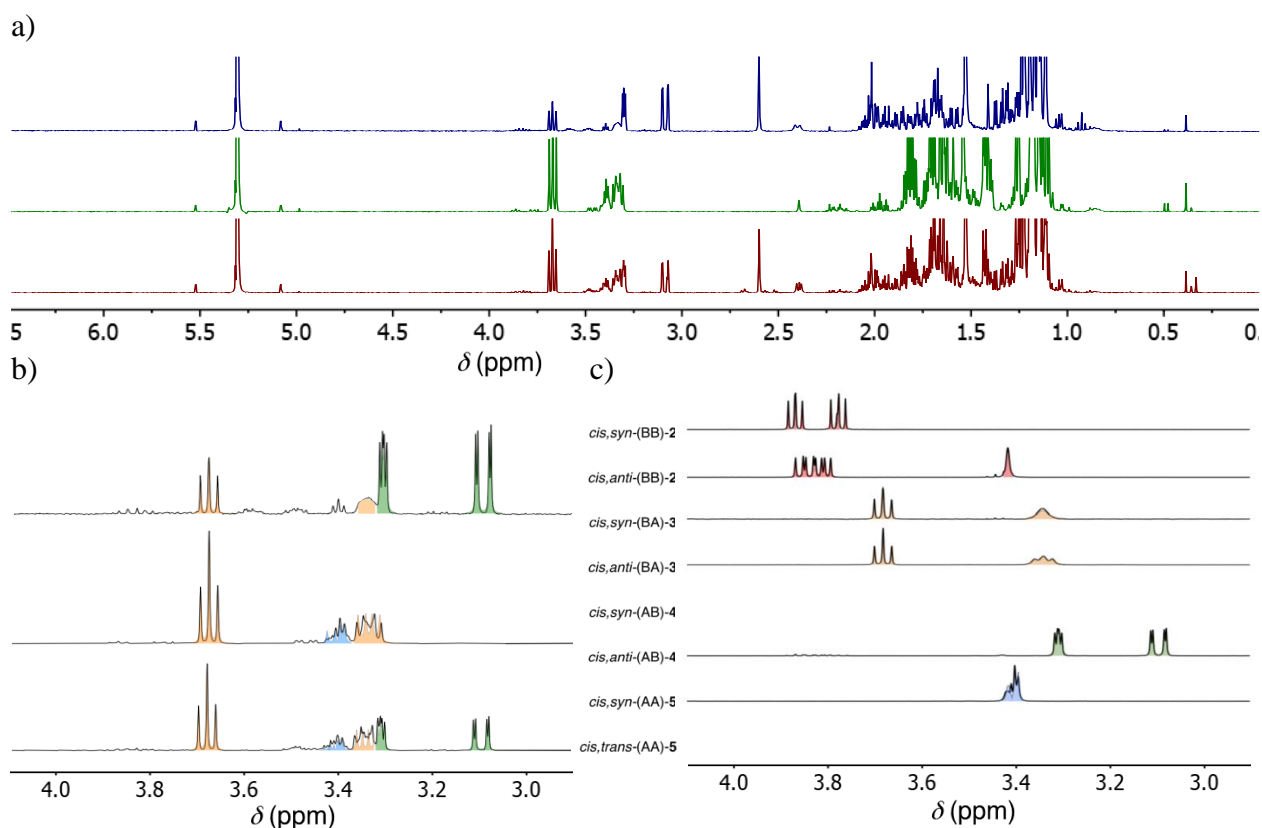

**Figure S8.** Crude <sup>1</sup>H NMR spectra analysis of the epoxide-opening cascade cyclization of *cis*-**1** (bottom), *cis,syn*-**1** (middle) and *cis,anti*-**1** (top) catalyzed by pnictogen-bonding catalyst **9**. a) Full <sup>1</sup>H NMR spectra. b) Zoomed <sup>1</sup>H NMR spectra. c) Decoded NMR fingerprint region for products of *cis* diepoxide substrates.

a)

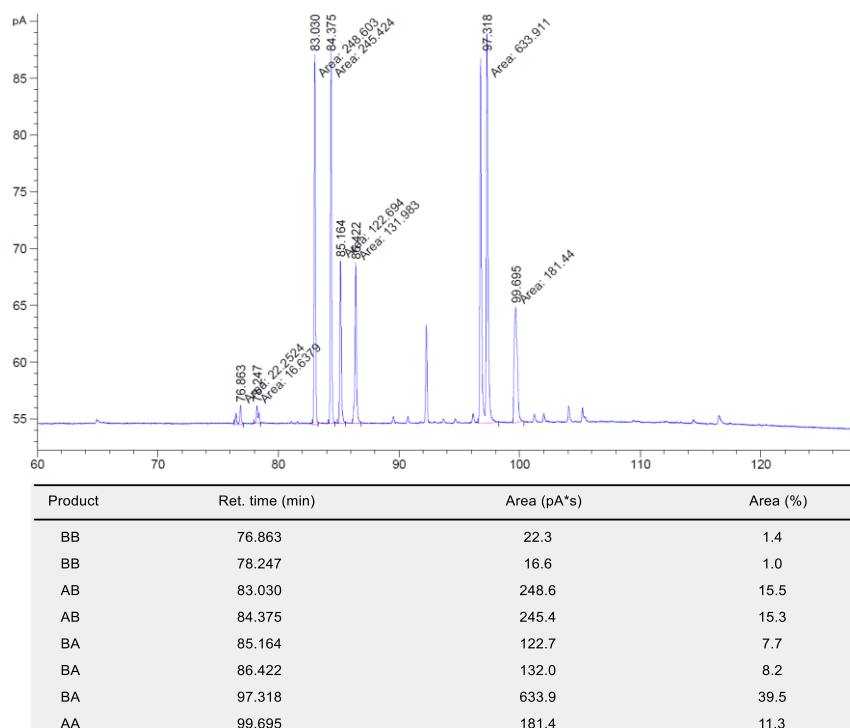

b)

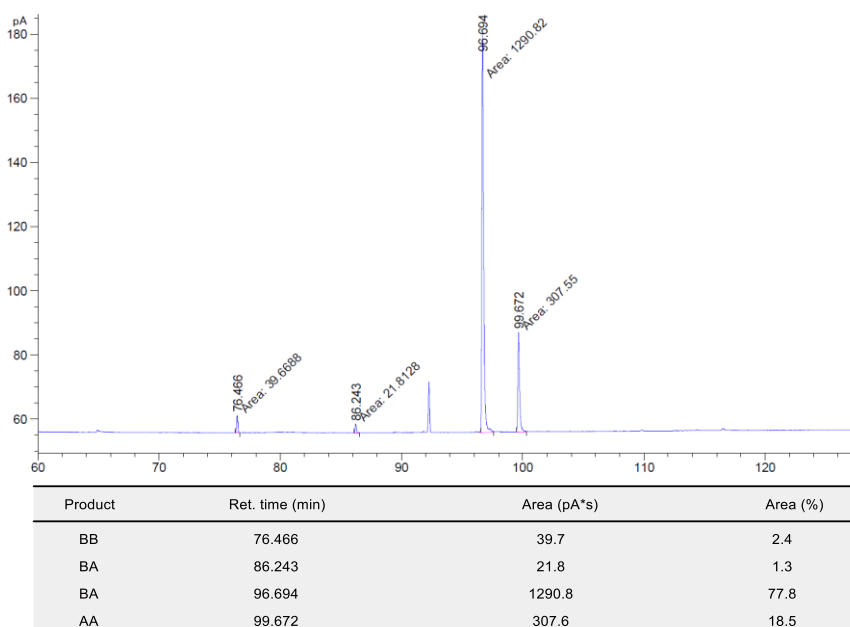

**Figure S9.** GC analysis of epoxides a) *cis*-**1** and b) *cis,syn*-**1** opening catalyzed by pnictogen-bonding catalyst **9**.

c)

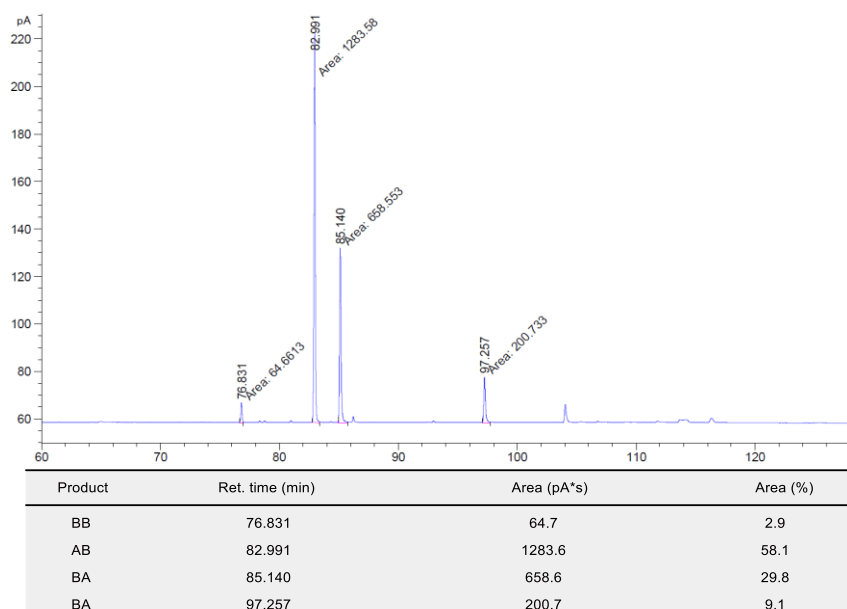

**Figure S9 (continued).** GC analysis of epoxide c) *cis,anti*-1 opening catalyzed by pnictogen-bonding catalyst **9**.

#### 4.1.4. $\pi$ -Acidic catalyst **10**

To a solution of *cis* diepoxide substrates (1.5 M) in  $\text{CD}_2\text{Cl}_2$  was added catalyst **10** (10 mol%), then the mixture was stirred at rt. The reaction was monitored by  $^1\text{H}$  NMR spectroscopy and stopped after 8 days when the complete consumption of the starting material was observed. An aliquot (50  $\mu\text{L}$ ) of the resulting solution was filtered over a filter tip using diethyl ether as the eluent and the resulting sample was subjected to GC-FID analysis (Conditions are described in the Materials and methods section).

a)

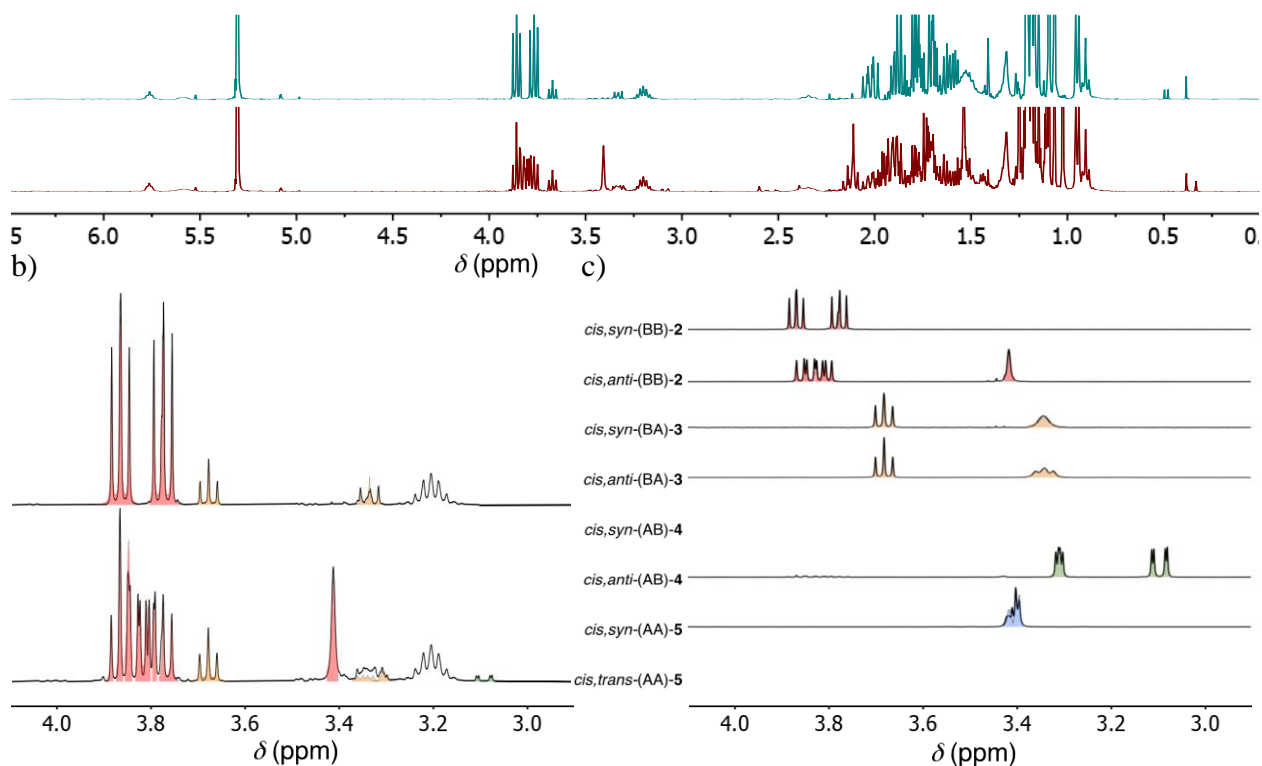

**Figure S10.** Crude  $^1\text{H}$  NMR spectra analysis of the epoxide-opening cascade cyclization of *cis*-**1** (bottom) and *cis,syn*-**1** (top) catalyzed by  $\pi$ -acidic catalyst **10**. a) Full  $^1\text{H}$  NMR spectra. b) Zoomed  $^1\text{H}$  NMR spectra. c) Decoded NMR fingerprint region for products of *cis* diepoxide substrates.

a)

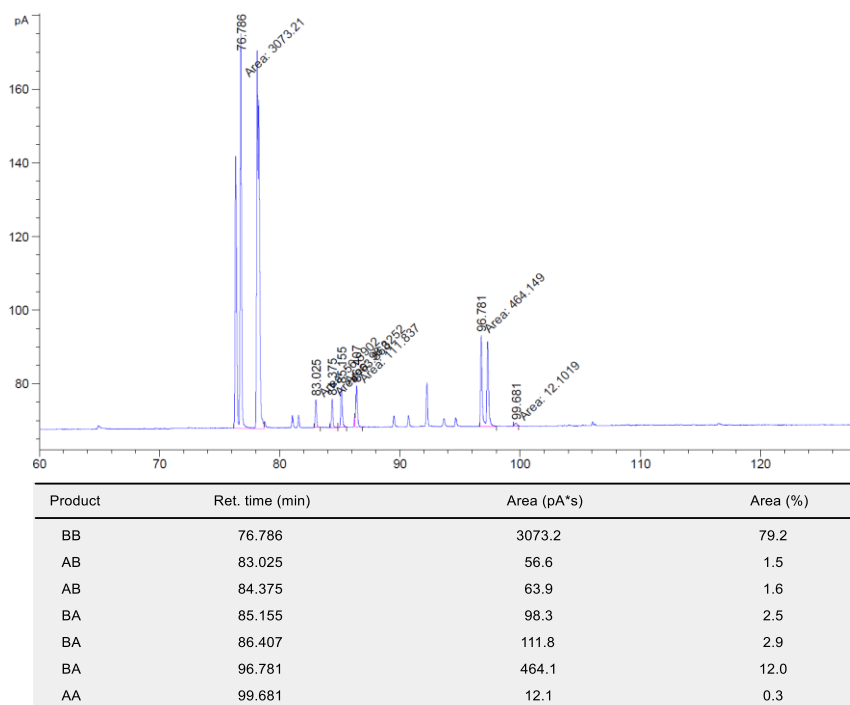

b)

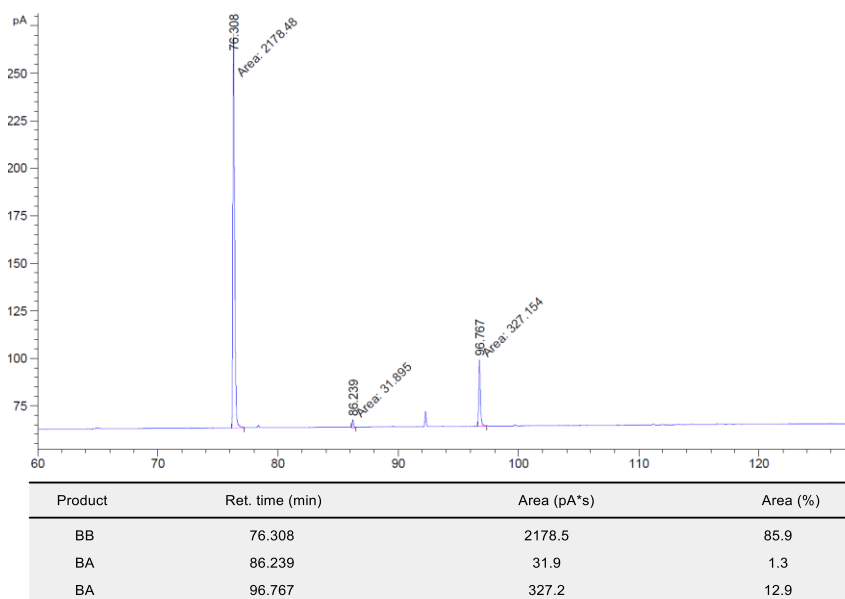

**Figure S11.** GC analysis of epoxides a) *cis*-1 and b) *cis,syn*-1 opening catalyzed by anion- $\pi$  catalyst **10**.



## 4.2. Catalysis with *trans* diepoxide substrates

**Table S2** Catalyst comparison on the diepoxide substrates *trans*-**1**, *trans,syn*-**1** and *trans,anti*-**1**<sup>a</sup>

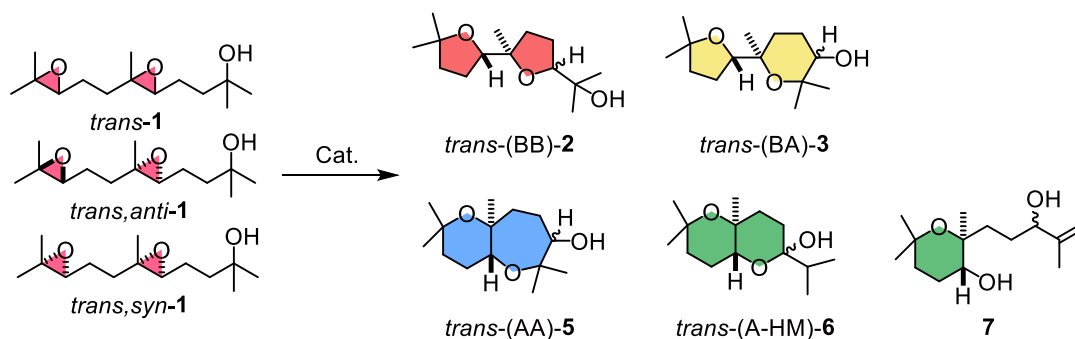

| Entry | Sub <sup>b</sup>             | Cat (mol%) <sup>c</sup> | <i>T</i> (°C) <sup>d</sup> | <i>t</i> <sup>e</sup> | $\eta_t$ (%) <sup>f</sup> | BB:BA:( <b>6</b> + <b>7</b> ):AA <sup>g</sup> |
|-------|------------------------------|-------------------------|----------------------------|-----------------------|---------------------------|-----------------------------------------------|
| 1     | <i>trans</i> - <b>1</b>      | AcOH (500)              | 40                         | 2 d                   | >95                       | 89:8:0:3                                      |
| 2     | <i>trans,anti</i> - <b>1</b> | AcOH (500)              | 40                         | 2 d                   | >95                       | 92:4:0:4                                      |
| 3     | <i>trans,syn</i> - <b>1</b>  | AcOH (500)              | 40                         | 2 d                   | >95                       | 86:12:0:2 <sup>h</sup>                        |
| 4     | <i>trans</i> - <b>1</b>      | <b>8</b> (10)           | 30                         | 7 d                   | >95                       | 28:6:47:18                                    |
| 5     | <i>trans,anti</i> - <b>1</b> | <b>8</b> (10)           | 30                         | 7 d                   | >95                       | 20:4:48:28                                    |
| 6     | <i>trans,syn</i> - <b>1</b>  | <b>8</b> (10)           | 30                         | 7 d                   | >95                       | 37:8:47:8 <sup>h</sup>                        |
| 7     | <i>trans</i> - <b>1</b>      | <b>9</b> (2.5)          | rt                         | 1 h                   | >95                       | 9:11:0:80                                     |
| 8     | <i>trans,anti</i> - <b>1</b> | <b>9</b> (2.5)          | rt                         | 1 h                   | >95                       | 10:13:0:77                                    |
| 9     | <i>trans,syn</i> - <b>1</b>  | <b>9</b> (2.5)          | rt                         | 1 h                   | >95                       | 8:9:0:83 <sup>h</sup>                         |

**Table S2 (continued)** Catalyst comparison on the diepoxide substrates *trans*-**1**, *trans,syn*-**1** and *trans,anti*-**1**<sup>a</sup>

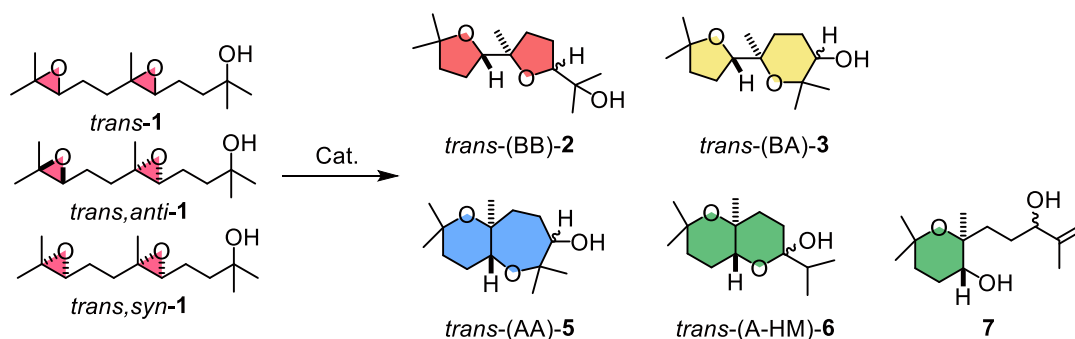

| Entry | Sub <sup>b</sup>             | Cat (mol%) <sup>c</sup> | T (°C) <sup>d</sup> | t <sup>e</sup> | η <sub>t</sub> (%) <sup>f</sup> | BB:BA:AB:AA <sup>g</sup> |
|-------|------------------------------|-------------------------|---------------------|----------------|---------------------------------|--------------------------|
| 10    | <i>trans</i> - <b>1</b>      | <b>10</b> (10)          | rt                  | 8 d            | >95                             | 80:13:0:7                |
| 11    | <i>trans,anti</i> - <b>1</b> | <b>10</b> (10)          | rt                  | 8 d            | >95                             | 82:10:0:8                |
| 12    | <i>trans,syn</i> - <b>1</b>  | <b>10</b> (10)          | rt                  | 8 d            | >95                             | 78:16:0:6 <sup>h</sup>   |

<sup>a</sup>Reaction conditions and data are indicated in the table. <sup>b</sup>Substrates. <sup>c</sup>Catalysts (Figure S1). In parenthesis, catalyst concentration in mol% relative to concentration of di-epoxide substrates. <sup>d</sup>Reaction temperature; rt: room temperature. <sup>e</sup>Reaction time. <sup>f</sup>Substrate conversion, in percent, from <sup>1</sup>H NMR spectra of product mixtures. <sup>g</sup>Selectivities were obtained from GC-FID analysis and the corresponding substrate was indicated in parenthesis. <sup>h</sup>Results for *trans,syn* isomer **1** are calculated (from data for the other diastereomer and the mixture of diastereomers in the respective series).

#### 4.2.1. Brønsted-acid catalyst AcOH

To a solution of *trans* diepoxide substrates (125 mM) in CD<sub>2</sub>Cl<sub>2</sub> was added AcOH (500 mol%), then the mixture was stirred at 40 °C. The reaction was monitored by <sup>1</sup>H NMR spectroscopy and stopped after 2 days when the complete consumption of the starting material was observed. An aliquot (50 μL) of the resulting solution was filtered over a filter tip using diethyl ether as the eluent and the resulting sample was subjected to GC-FID analysis (Conditions are described in the Materials and methods section).

a)

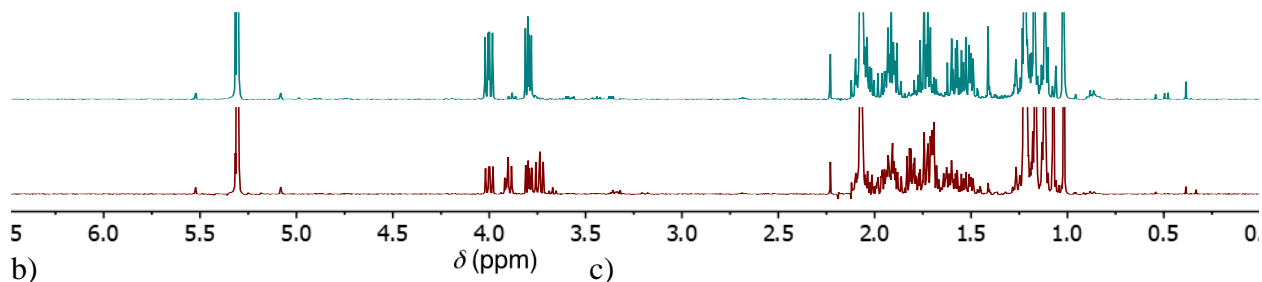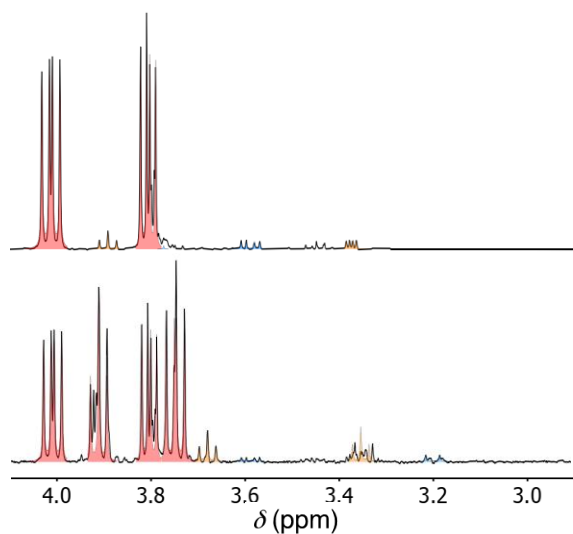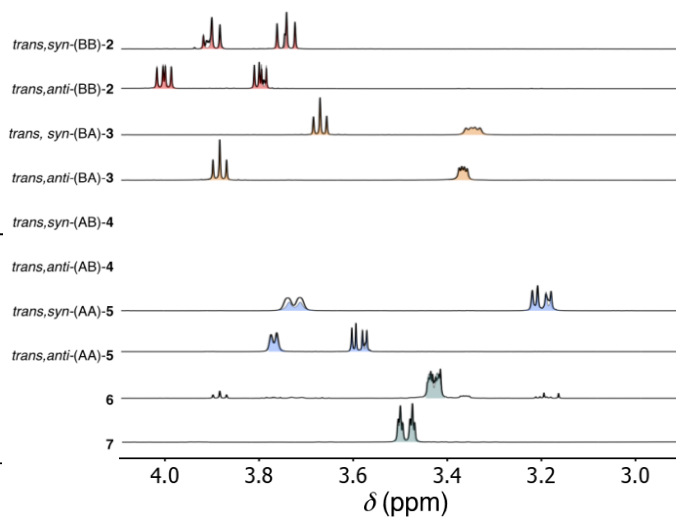

**Figure S12.** Crude <sup>1</sup>H NMR spectra analysis of the epoxide-opening cascade cyclization of *trans*-1 (bottom) and *trans,anti*-1 (top) catalyzed by AcOH. a) Full <sup>1</sup>H NMR spectra. b) Zoomed <sup>1</sup>H NMR spectra. c) Decoded NMR fingerprint region for products of *trans* diepoxide substrates.

a)

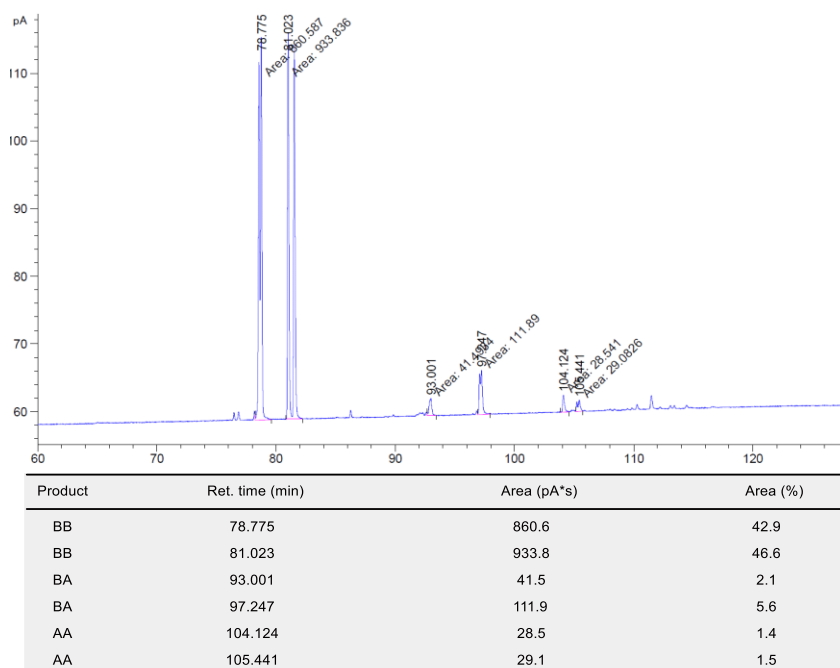

b)

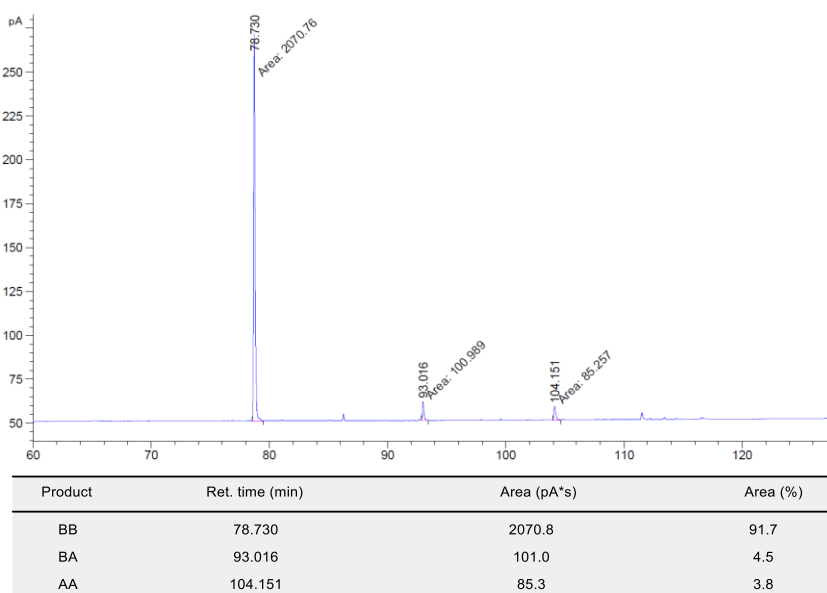

**Figure S13.** GC analysis of epoxides a) *trans*-1 and b) *trans,anti*-1 opening catalyzed by AcOH.

#### 4.2.2. $\pi$ -Basic capsule catalyst **8**

To a solution of *trans* diepoxide substrates (33.3 mM) in  $\text{CHCl}_3$  (Pre-treated as described in the Materials and methods section) was added capsule monomer **11** (60 mol%, capsule catalyst **8** was self-assembled from six molecules of **11** in the solution), then the mixture was stirred at rt. The mixture was stirred at rt and stopped after 7 days when the complete consumption of the starting material was observed. An aliquot (100  $\mu\text{L}$ ) of the resulting solution was filtered over a filter tip using diethyl ether as the eluent and the resulting sample was subjected to GC-FID analysis (Conditions are described in the Materials and methods section). Another aliquot (500  $\mu\text{L}$ ) of the reaction mixture was chromatographed by a silica gel column using hexane/diethyl ether (9:1 to 1:1) as the eluent to remove capsule monomer **11** and the resulting sample was subjected to  $^1\text{H}$  NMR spectroscopy analysis, GC analysis of the mixture showed the same products distribution as the crude.

a)

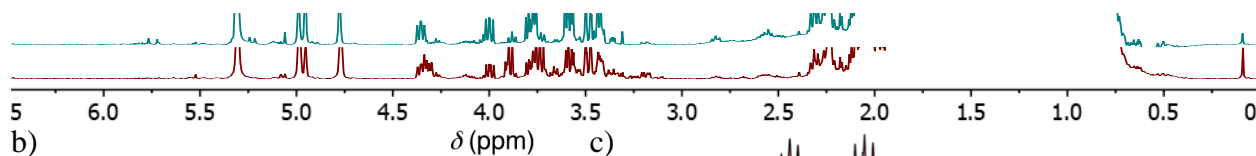

b)

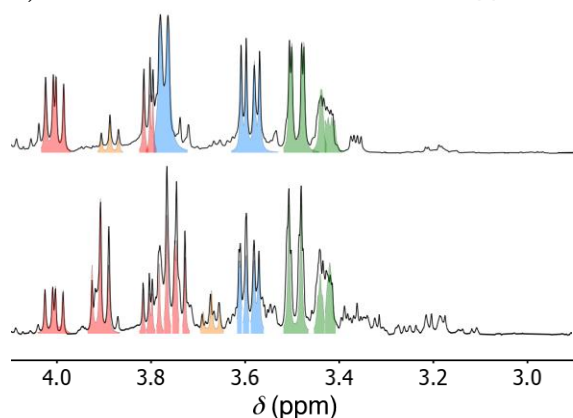

c)

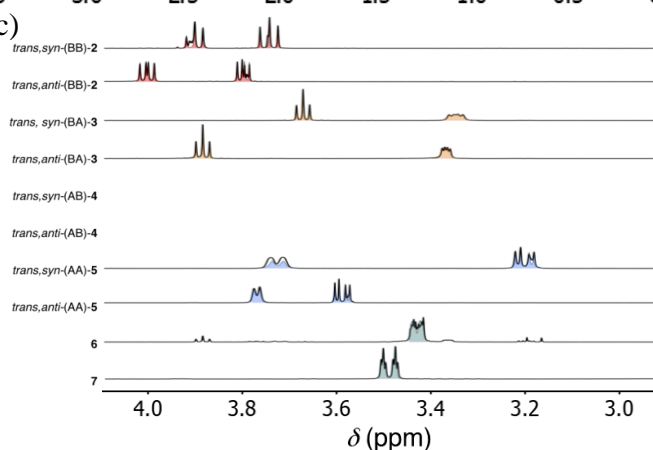

**Figure S14.** Crude  $^1\text{H}$  NMR spectra analysis of the epoxide-opening cascade cyclization of *trans*-**1** (bottom) and *trans,anti*-**1** (top) catalyzed by capsule catalyst **8**. a) Full  $^1\text{H}$  NMR spectra. b) Zoomed  $^1\text{H}$  NMR spectra. c) Decoded NMR fingerprint region for products of *trans* diepoxide substrates.

a)

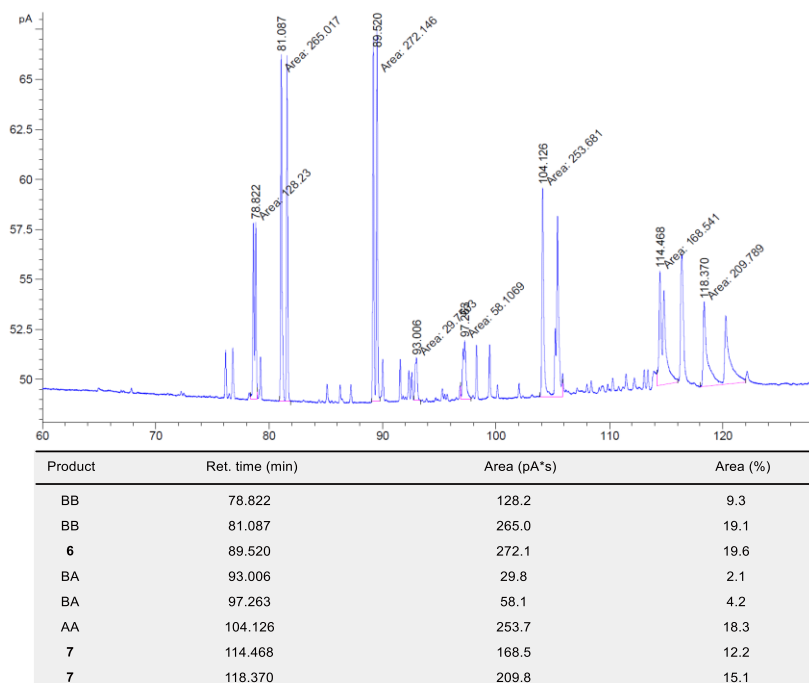

b)

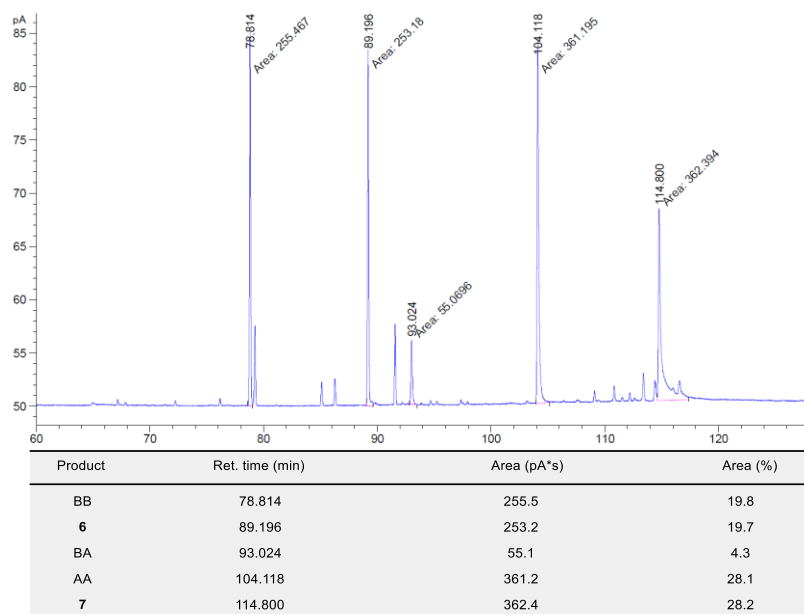

**Figure S15.** GC analysis of epoxides a) *trans*-1 and b) *trans,anti*-1 opening catalyzed by capsule catalyst **8**.

### 4.2.3. Pnictogen-bonding catalyst **9**

To a solution of *trans* diepoxide substrates (125 mM) in CD<sub>2</sub>Cl<sub>2</sub> was added catalyst **9** (2.5 mol%), then the mixture was stirred at rt. The reaction was monitored by <sup>1</sup>H NMR spectroscopy and stopped after 1 h when the complete consumption of the starting material was observed. An aliquot (50 μL) of the resulting solution was filtered over a filter tip using diethyl ether as the eluent and the resulting sample was subjected to GC-FID analysis (Conditions are described in the Materials and methods section).

a)

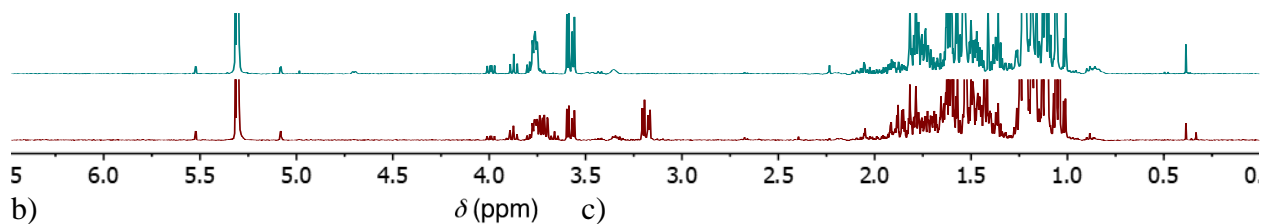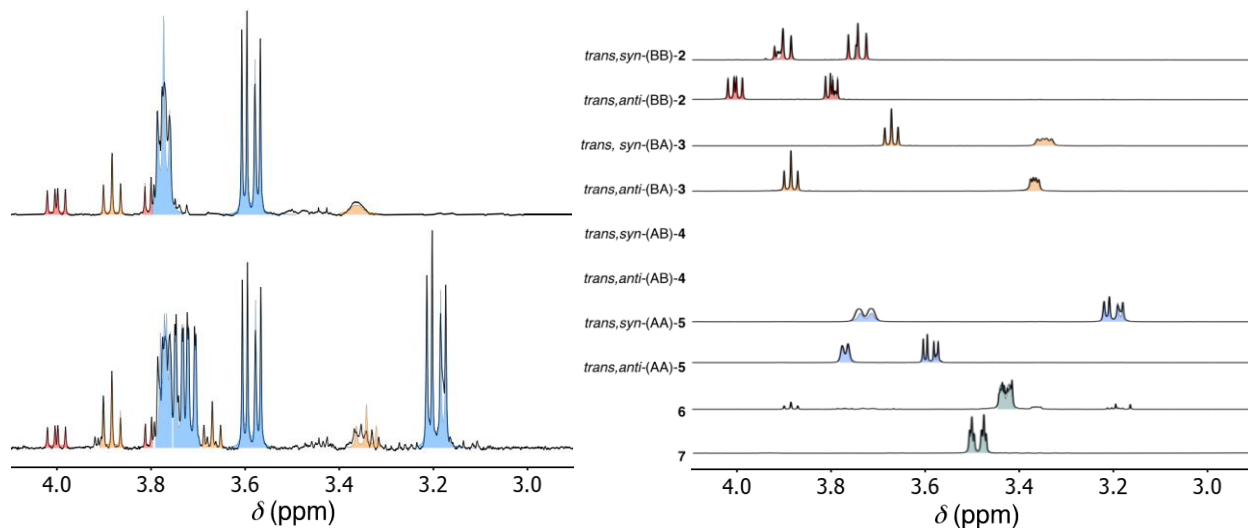

**Figure S16.** Crude <sup>1</sup>H NMR spectra analysis of the epoxide-opening cascade cyclization of *trans*-**1** (bottom) and *trans,anti*-**1** (top) catalyzed by pnictogen-bonding catalyst **9**. a) Full <sup>1</sup>H NMR spectra. b) Zoomed <sup>1</sup>H NMR spectra. c) Decoded NMR fingerprint region for products of *trans* diepoxide substrates.

a)

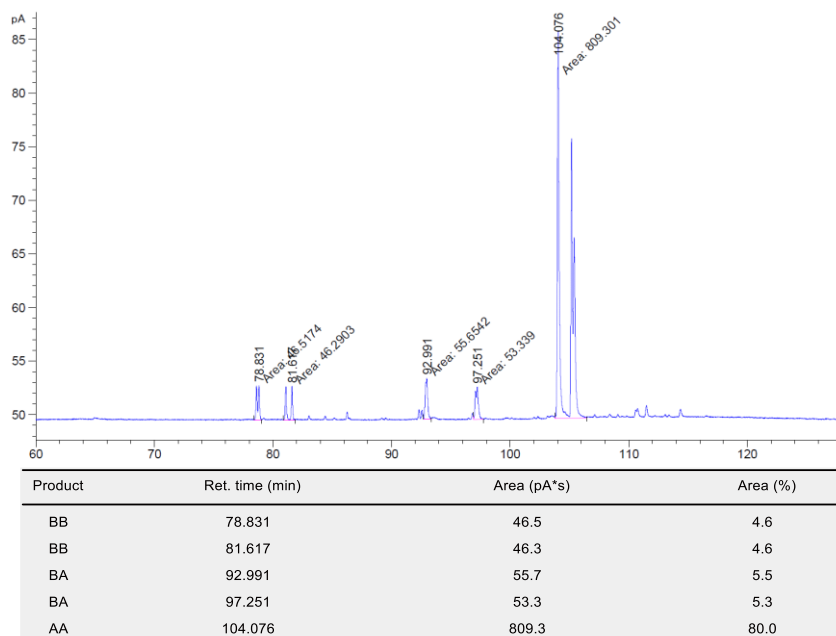

b)

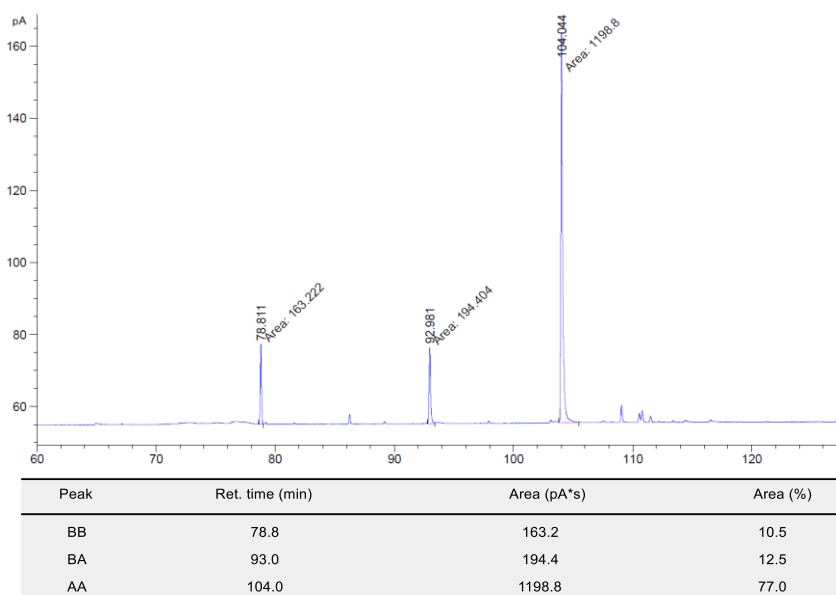

**Figure S17.** GC analysis of epoxides a) *trans*-**1** and b) *trans,anti*-**1** opening catalyzed by pnictogen-bonding catalyst **9**.



#### 4.2.4. $\pi$ -Acidic catalyst **10**

To a solution of *trans* diepoxide substrates (1.5 M) in CD<sub>2</sub>Cl<sub>2</sub> was added catalyst **10** (10 mol%), then the mixture was stirred at rt. The reaction was monitored by <sup>1</sup>H NMR spectroscopy and stopped after 8 days when the complete consumption of the starting material was observed. An aliquot (50  $\mu$ L) of the resulting solution was filtered over a filter tip using diethyl ether as the eluent and the resulting sample was subjected to GC-FID analysis (Conditions are described in the Materials and methods section).

a)

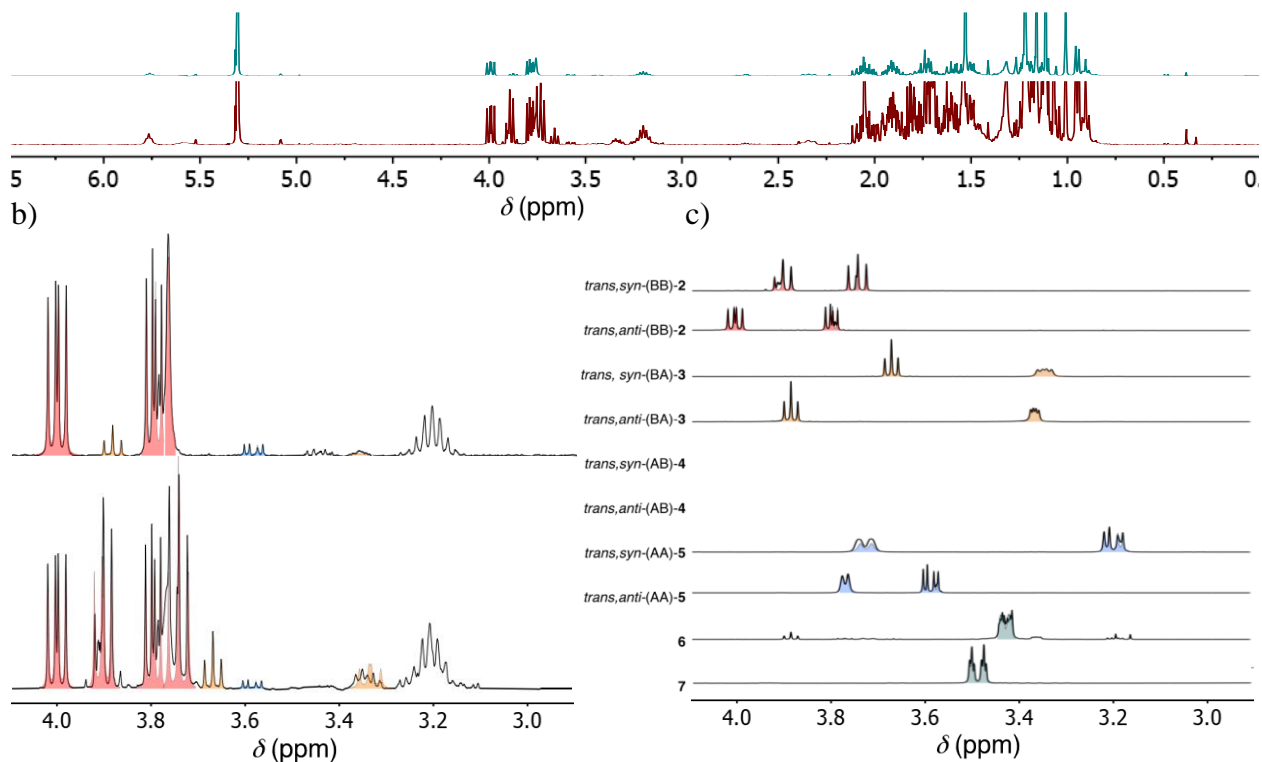

**Figure S18.** Crude <sup>1</sup>H NMR spectra analysis of the epoxide-opening cascade cyclization of *trans*-**1** (bottom) and *trans,anti*-**1** (top) catalyzed by  $\pi$ -acidic catalyst **10**. a) Full <sup>1</sup>H NMR spectra. b) Zoomed <sup>1</sup>H NMR spectra. c) Decoded NMR fingerprint region for products of *trans* diepoxide substrates.

a)

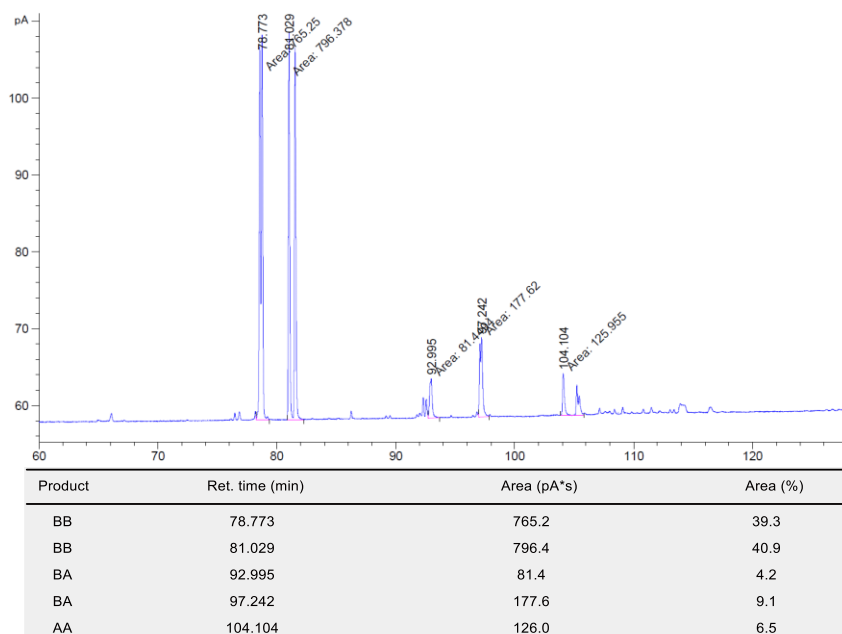

b)

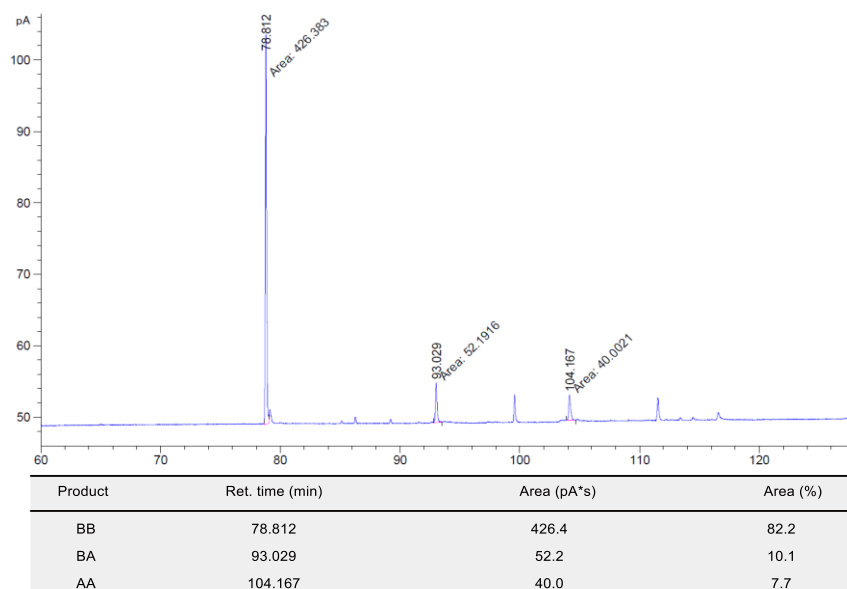

**Figure S19.** GC analysis of epoxides a) *trans*-**1** and b) *trans,anti*-**1** opening catalyzed by anion- $\pi$  catalyst **10**.

## 5. Kinetics analysis

*Procedures for anion- $\pi$  catalyst 10.*

**General procedure A.** To a solution of *cis-1*, *cis,syn-1*, *trans-1* or *trans,anti-1* diepoxide substrate (18.1 mg, 75  $\mu$ mol) in CD<sub>2</sub>Cl<sub>2</sub> (50  $\mu$ L) was added catalyst **10** (8.4 mg, 7.5  $\mu$ mol), then the mixture was stirred at rt. The reaction was monitored by <sup>1</sup>H NMR spectroscopy.

**Kinetic studies.** Concentrations of products were estimated from the consumption of the substrate and were plotted against time. Here pseudo-first-order conditions are assumed for the analysis of the autocatalysis,<sup>S9</sup> and the reaction rate (*r*) can be expressed as

$$r = k_1[\text{R}] + k_2[\text{R}][\text{P}] \quad (\text{S1})$$

where *k*<sub>1</sub> and *k*<sub>2</sub> are the rate constants corresponding to the non(auto)catalytic and the (auto)catalytic mechanisms, respectively. Assuming first order in both reactant (R) and autocatalytic product (P), and

$$[\text{P}] = [\text{R}]_0 - [\text{R}] \quad (\text{S2})$$

then,

$$[\text{P}] = [\text{R}]_0 \times \left(1 - \frac{b+k_1}{b+k_1 \exp(k_1+b)t}\right) \quad (\text{S3})^{\text{S10}}$$

where,

$$b = [\text{R}]_0 k_2 \quad (\text{S4})$$

The rate constants *k*<sub>1</sub> and *k*<sub>2</sub> were obtained by fitting the data to the equations (S3) and (S4). The substrate half-lifetimes (*t*<sub>50</sub>) were obtained using Equation (S5).

$$t_{50} = \ln(b/k_1+2)/(b+k_1) \quad (\text{S5})$$

*Procedures for AcOH.*

**General procedure B.** To a solution of *cis*-**1**, *cis,syn*-**1**, *trans*-**1** or *trans,anti*-**1** diepoxide substrate (18.1 mg, 75  $\mu\text{mol}$ ) in  $\text{CD}_2\text{Cl}_2$  (600  $\mu\text{L}$ ) was added AcOH (21.4  $\mu\text{L}$ , 374  $\mu\text{mol}$ ), then the mixture was stirred at 40  $^\circ\text{C}$ . The reaction was monitored by  $^1\text{H}$  NMR spectroscopy.

**Kinetic studies.** The pseudo-first-order rate constant ( $k$ ) was estimated by fitting the data to the Equation (S6):

$$[\text{P}] = [\text{R}]_0 - ([\text{R}]_0 - [\text{P}]_0) \cdot \exp(-kt) \quad (\text{S6})$$

$[\text{P}]$  starts at  $[\text{P}]_0 = 0$ , then goes up to  $[\text{R}]_0$  with one phase. The rate constants  $k$  was obtained by fitting the data to Equation (S6). The substrate half-lifetimes ( $t_{50}$ ) were obtained using Equation (S7).

$$t_{50} = \ln[2 \cdot ([\text{R}]_0 - [\text{P}]_0) / [\text{R}]_0] / k \quad (\text{S7})$$

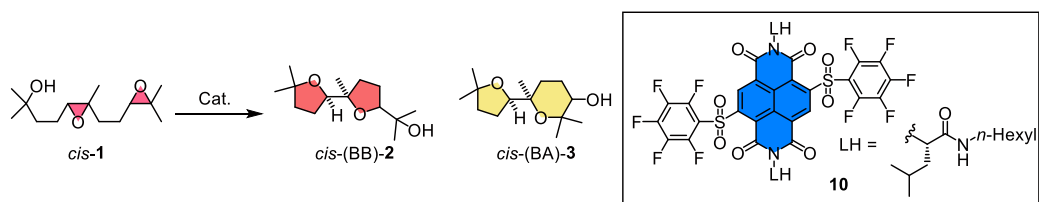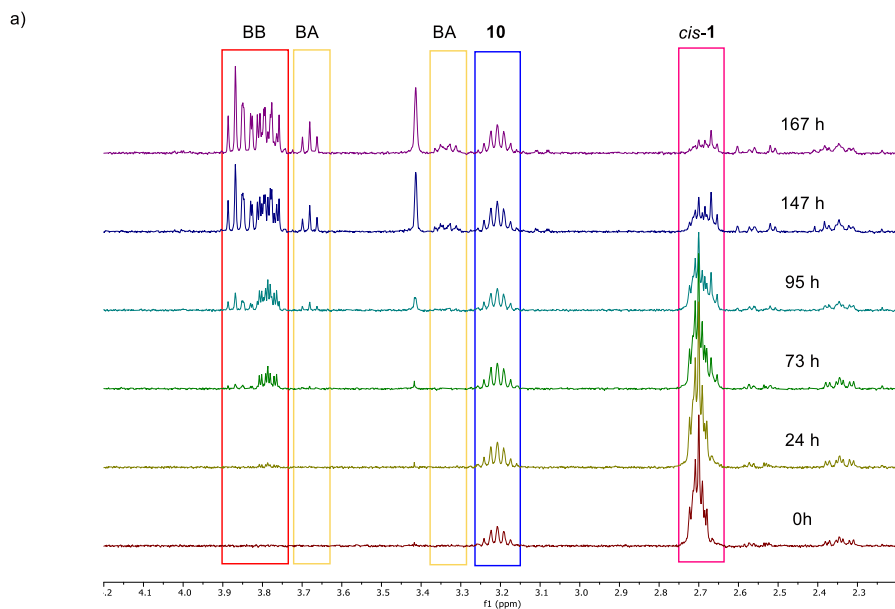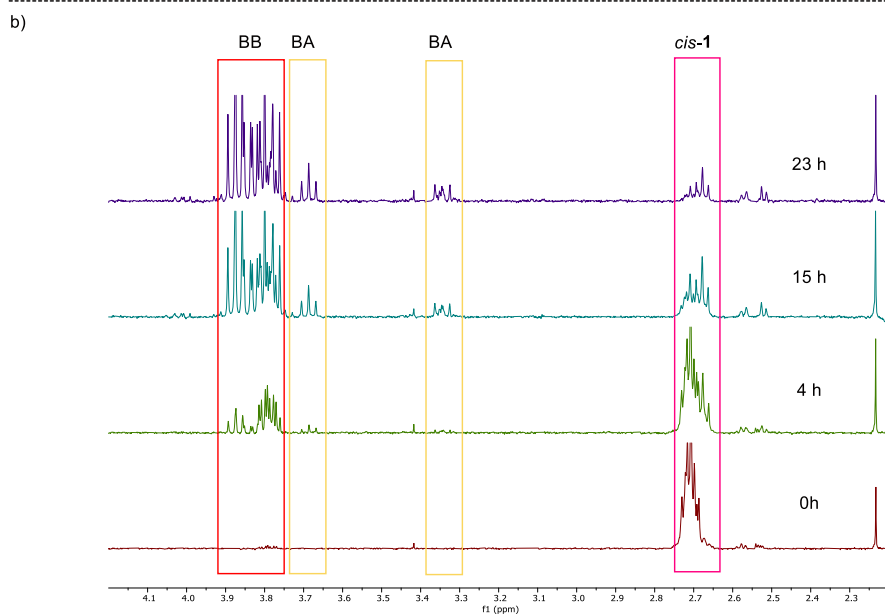

**Figure S20.** Kinetic studies of *cis-1* with a) anion- $\pi$  catalyst **10** and b) Brønsted acid catalyst. AcOH.

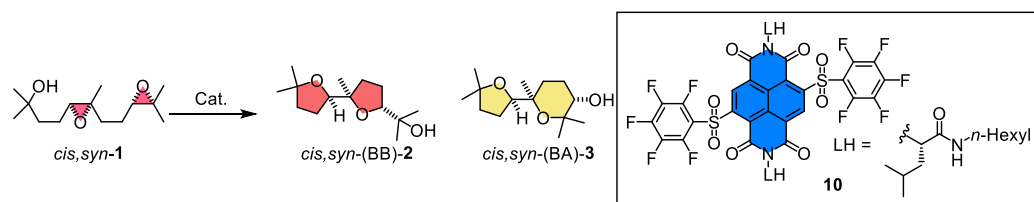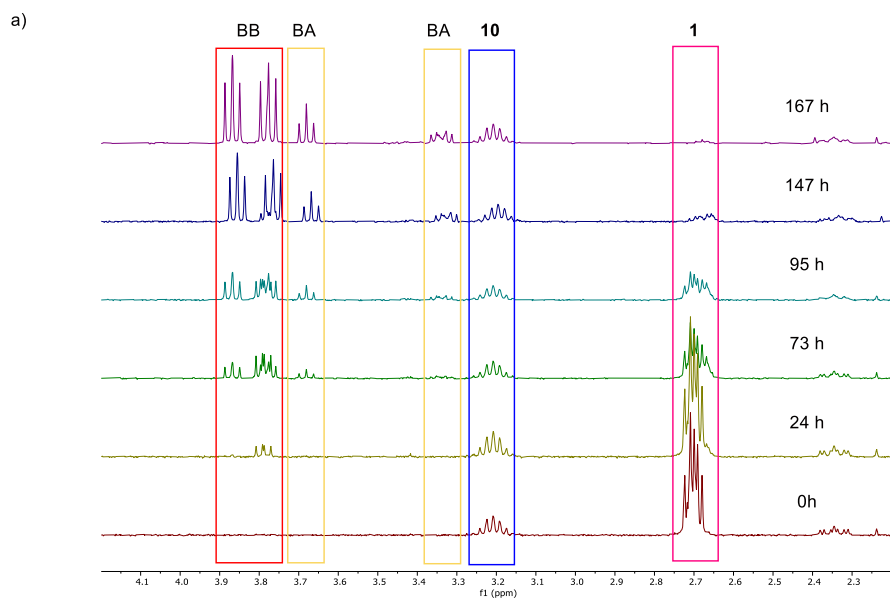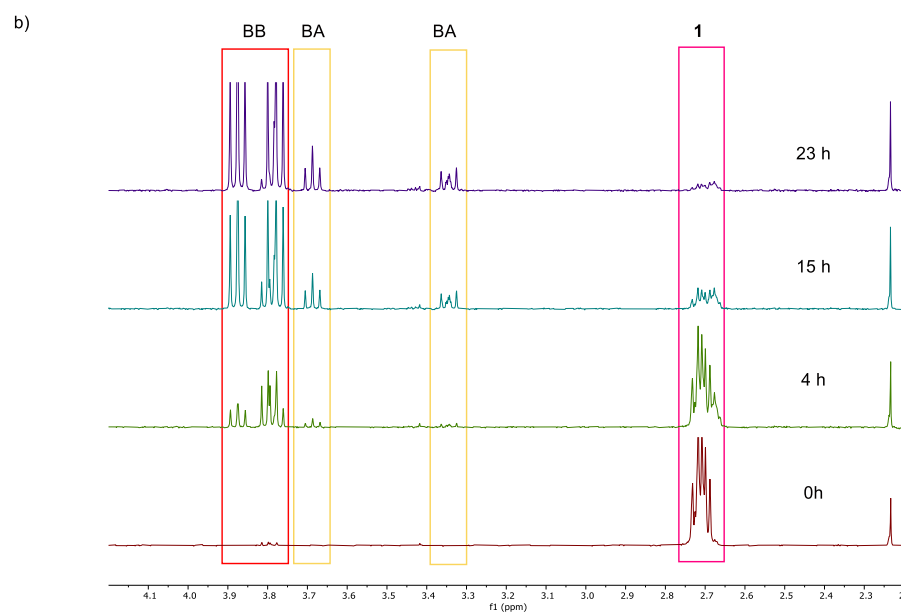

**Figure S21.** Kinetic studies of *cis,syn*-1 with a) anion- $\pi$  catalyst **10** and b) Brønsted acid catalyst AcOH.

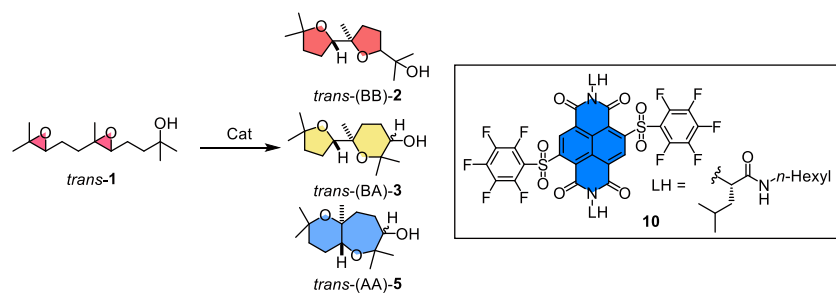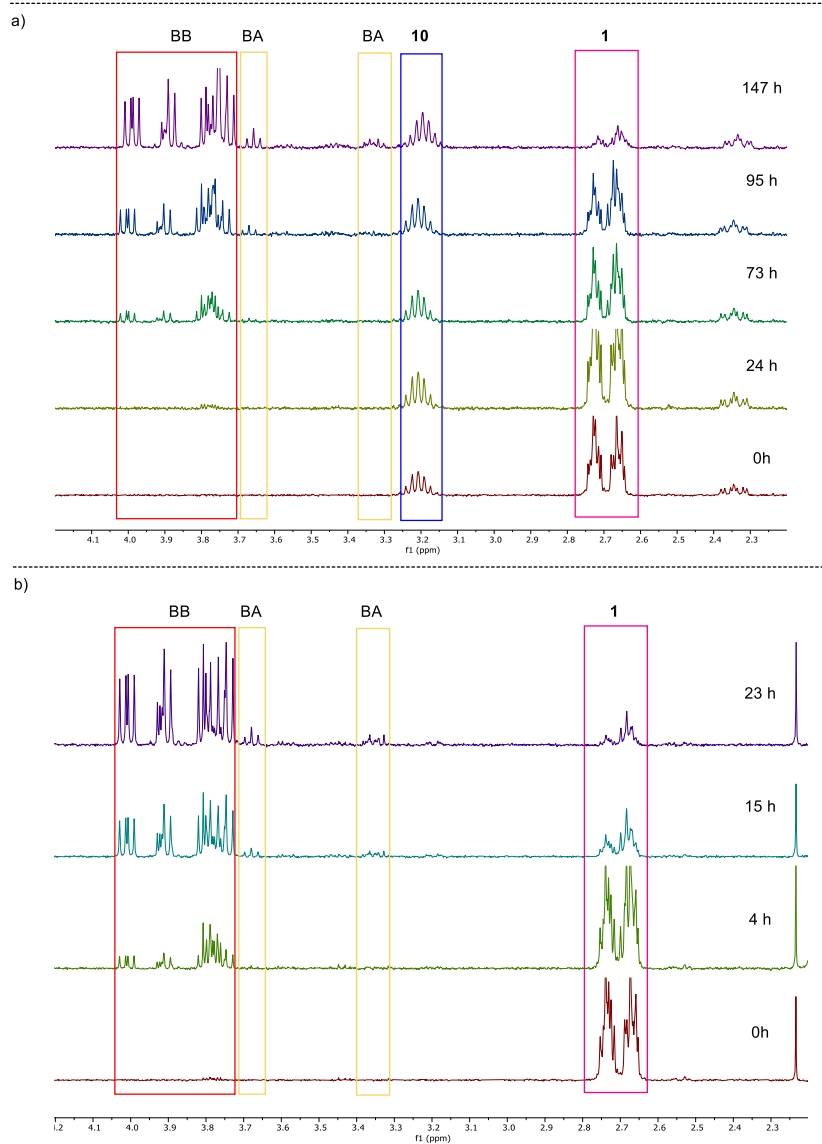

**Figure S22.** Kinetic studies of *trans*-**1** with a) anion- $\pi$  catalyst **10** and b) Brønsted acid catalyst AcOH.

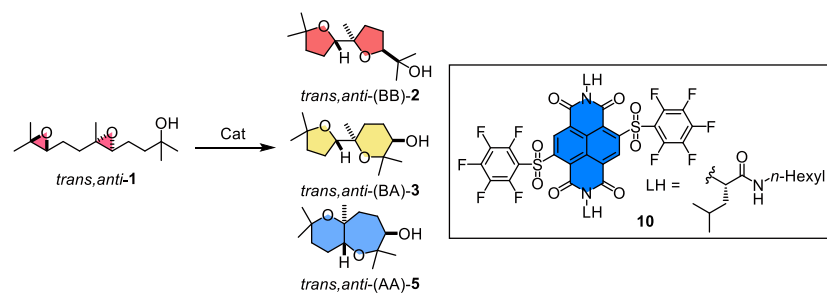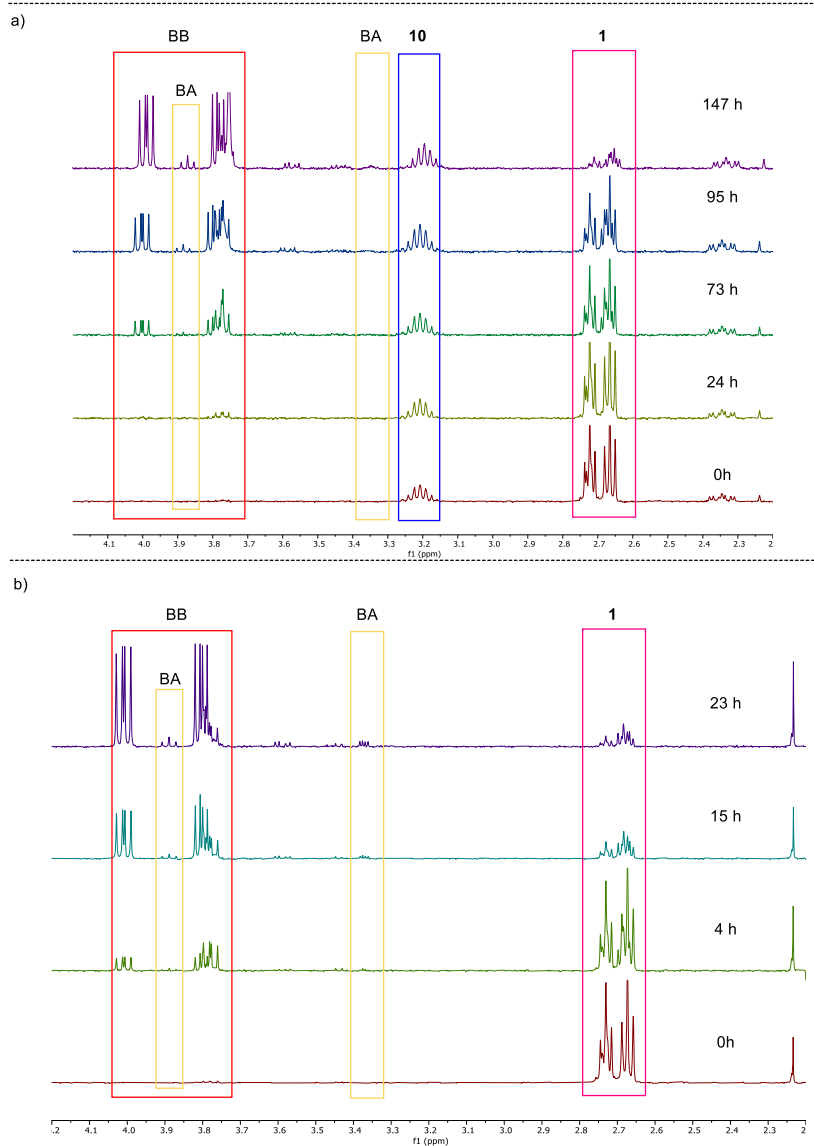

**Figure S23.** Kinetic studies of *trans,anti-1* with a) anion- $\pi$  catalyst **10** and b) Brønsted acid catalyst AcOH.



## 6. NMR spectra

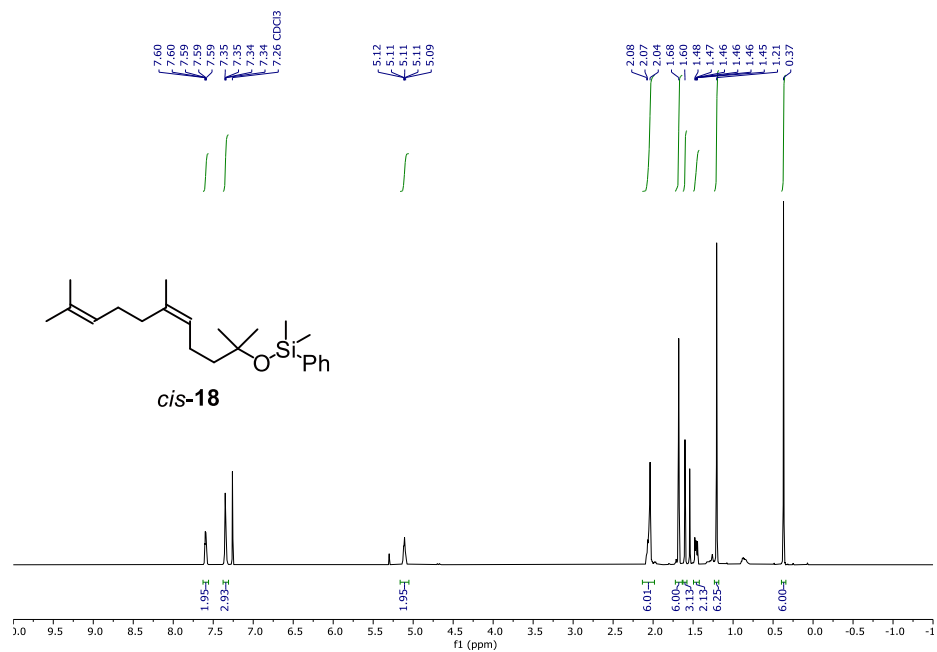

**Figure S24.** 500 MHz <sup>1</sup>H NMR spectrum of *cis*-18 in CDCl<sub>3</sub>.

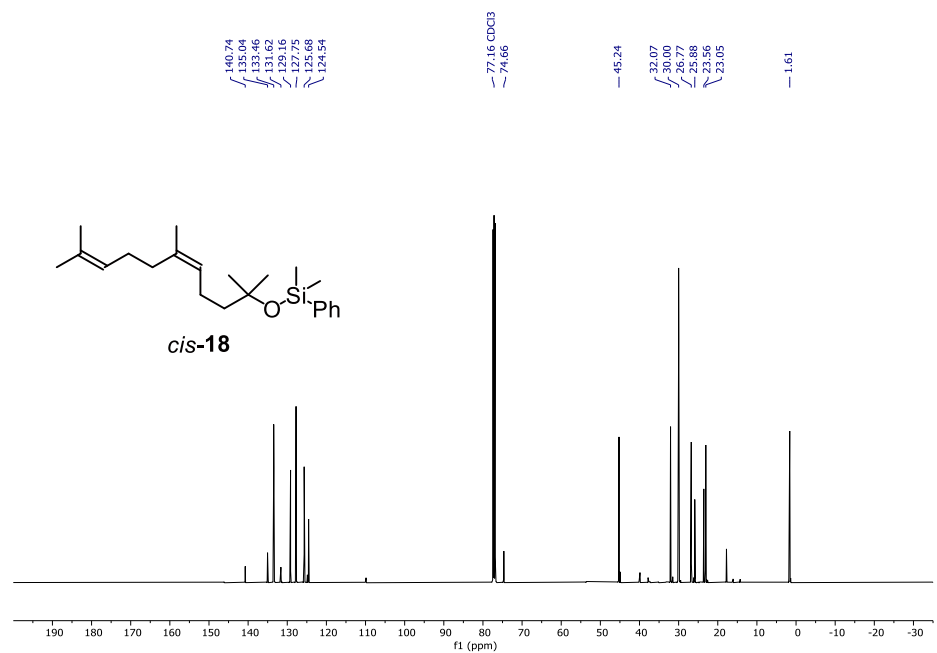

**Figure S25.** 125 MHz <sup>13</sup>C NMR spectrum of *cis*-18 in CDCl<sub>3</sub>.

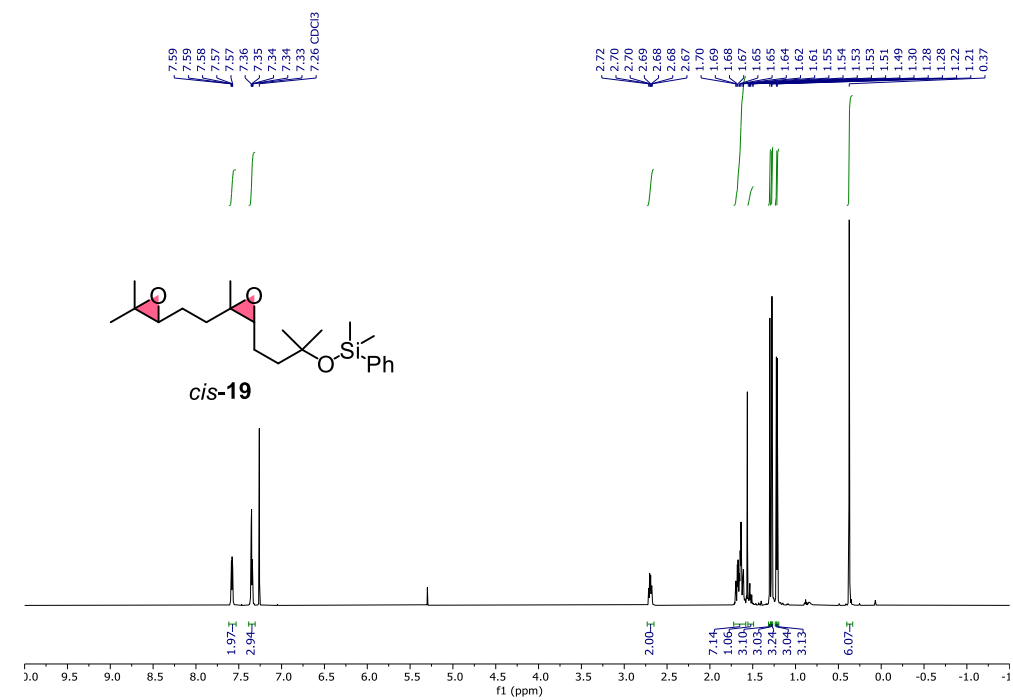

**Figure S26.** 500 MHz <sup>1</sup>H NMR spectrum of *cis*-19 in CDCl<sub>3</sub>.

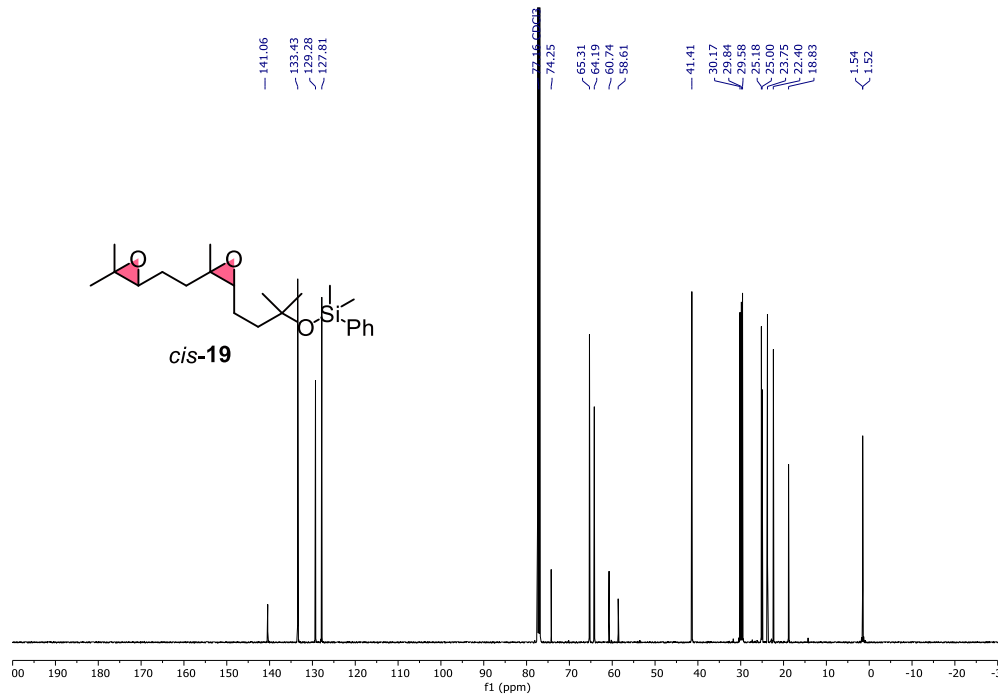

**Figure S27.** 125 MHz <sup>13</sup>C NMR spectrum of *cis*-19 in CDCl<sub>3</sub>.

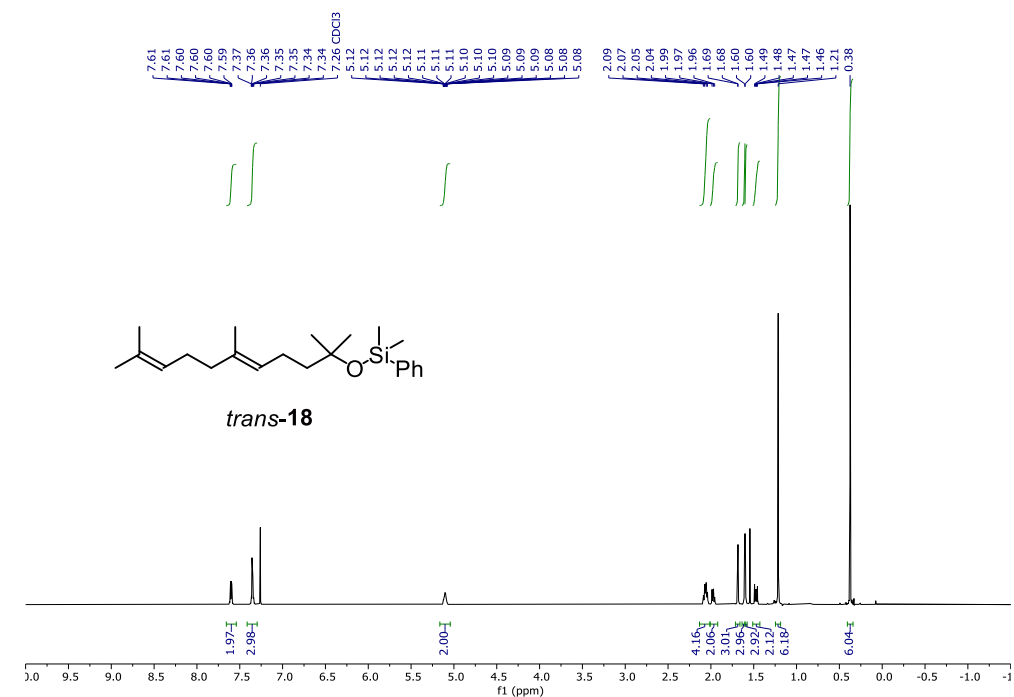

**Figure S28.** 500 MHz  $^1\text{H}$  NMR spectrum of *trans*-18 in  $\text{CDCl}_3$ .

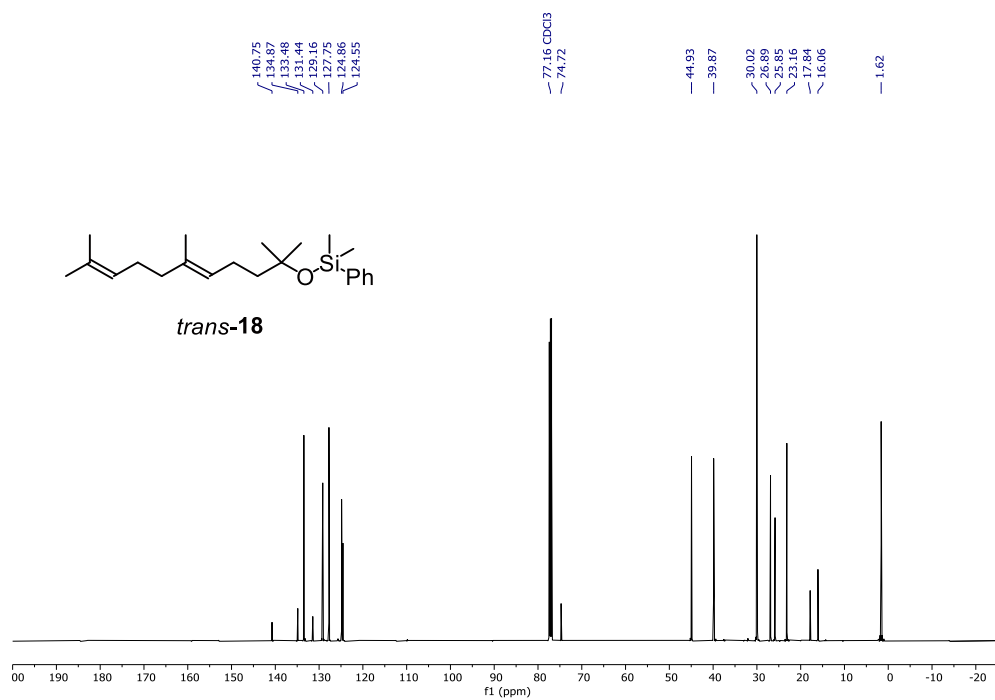

**Figure S29.** 125 MHz  $^{13}\text{C}$  NMR spectrum of *trans*-18 in  $\text{CDCl}_3$ .



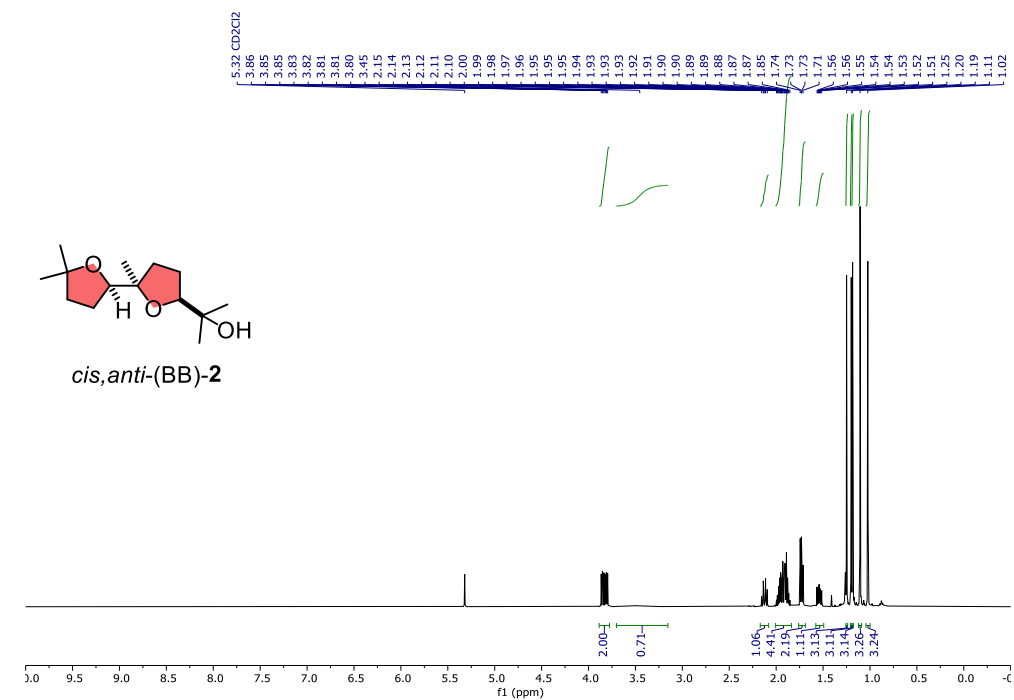

**Figure S32.** 500 MHz  $^1\text{H}$  NMR spectrum of *cis,anti*-(BB)-2 in  $\text{CD}_2\text{Cl}_2$ .

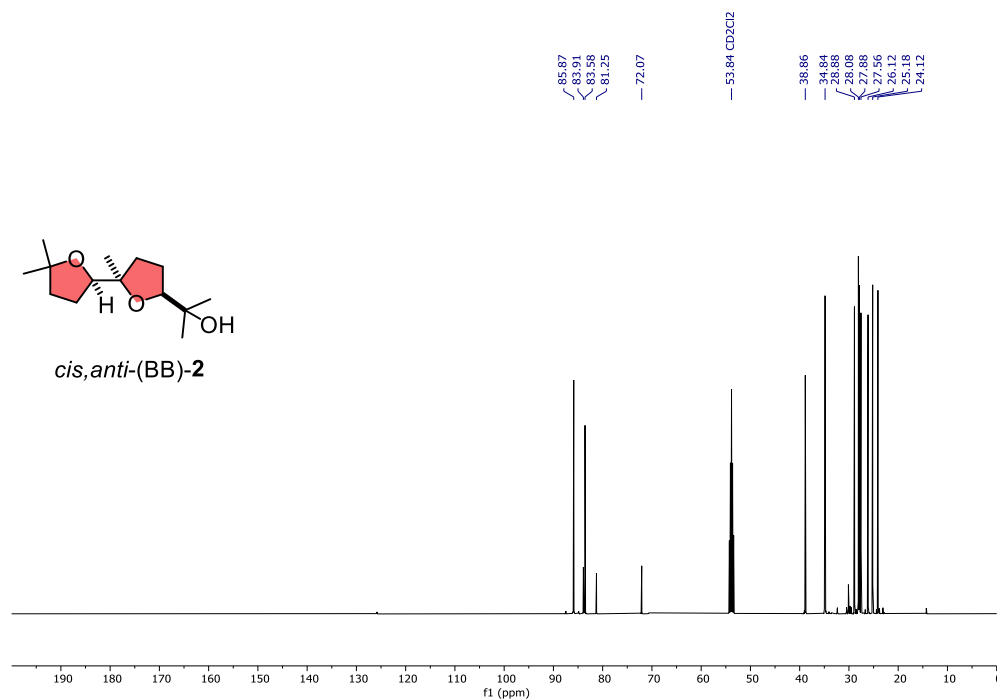

**Figure S33.** 125 MHz  $^{13}\text{C}$  NMR spectrum of *cis,anti*-(BB)-2 in  $\text{CD}_2\text{Cl}_2$ .

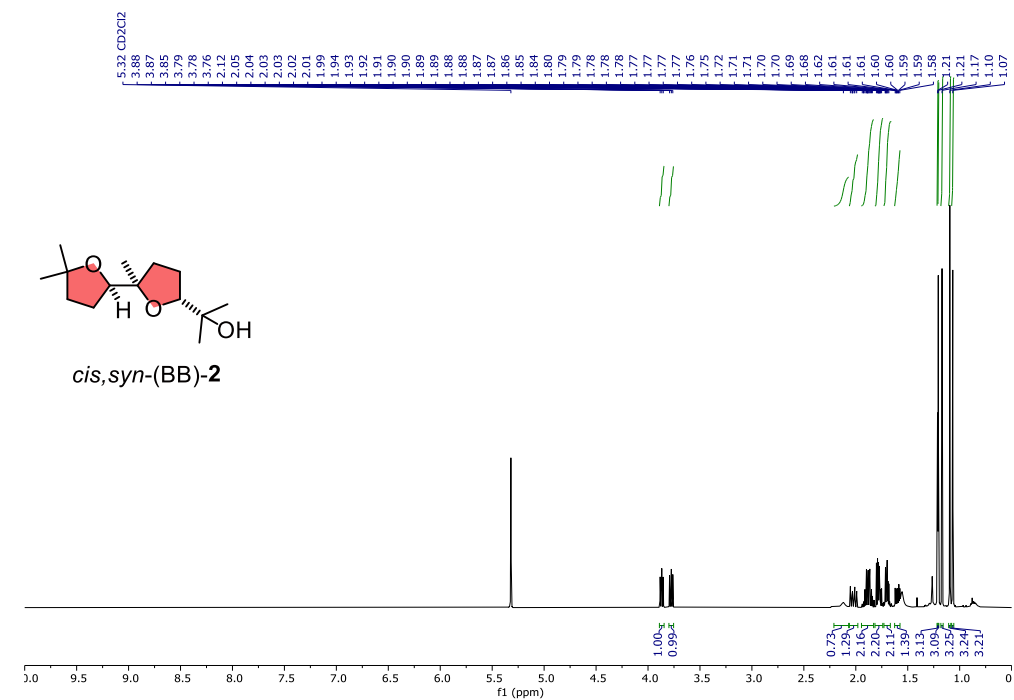

Figure S34. 500 MHz <sup>1</sup>H NMR spectrum of *cis,syn*-(BB)-2 in CD<sub>2</sub>Cl<sub>2</sub>.

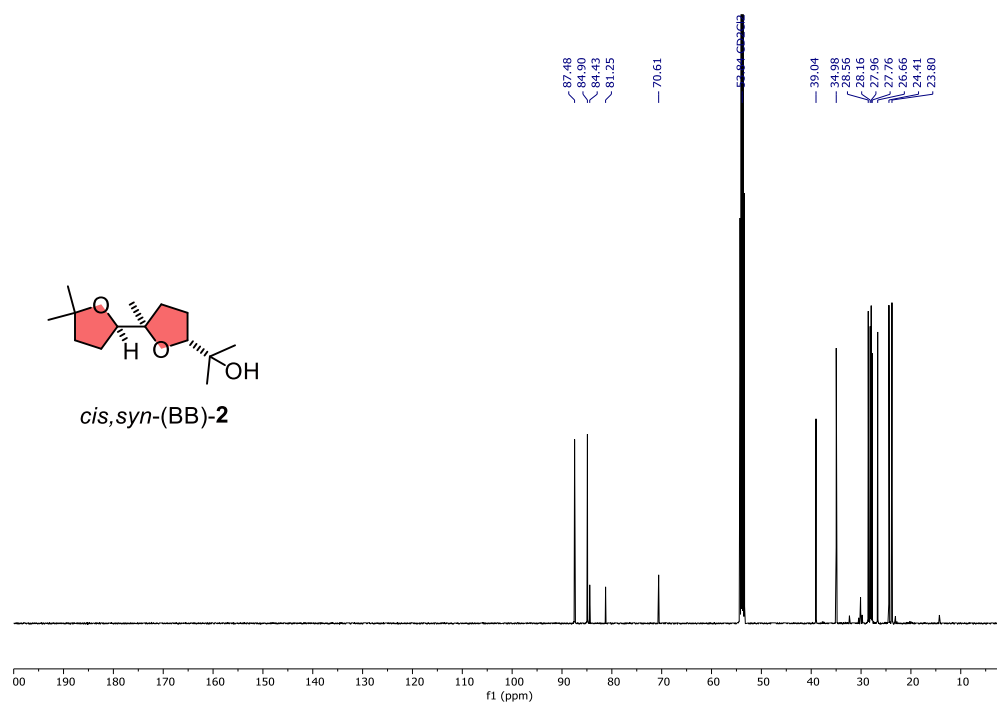

Figure S35. 125 MHz <sup>13</sup>C NMR spectrum of *cis,syn*-(BB)-2 in CD<sub>2</sub>Cl<sub>2</sub>.

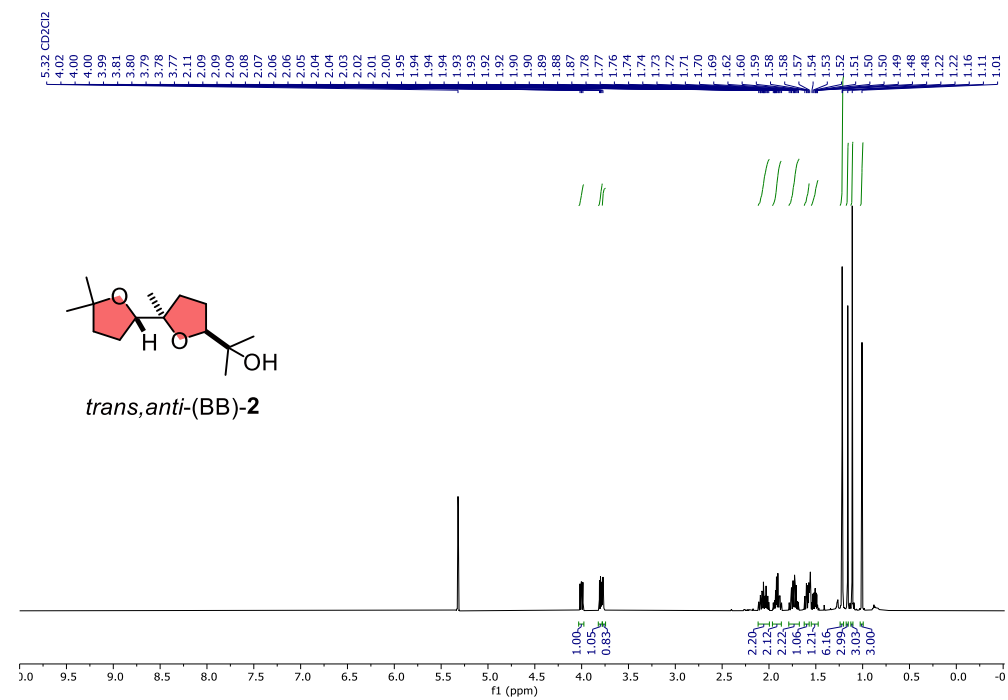

Figure S36. 500 MHz  $^1\text{H}$  NMR spectrum of *trans,anti*-(BB)-2 in  $\text{CD}_2\text{Cl}_2$ .

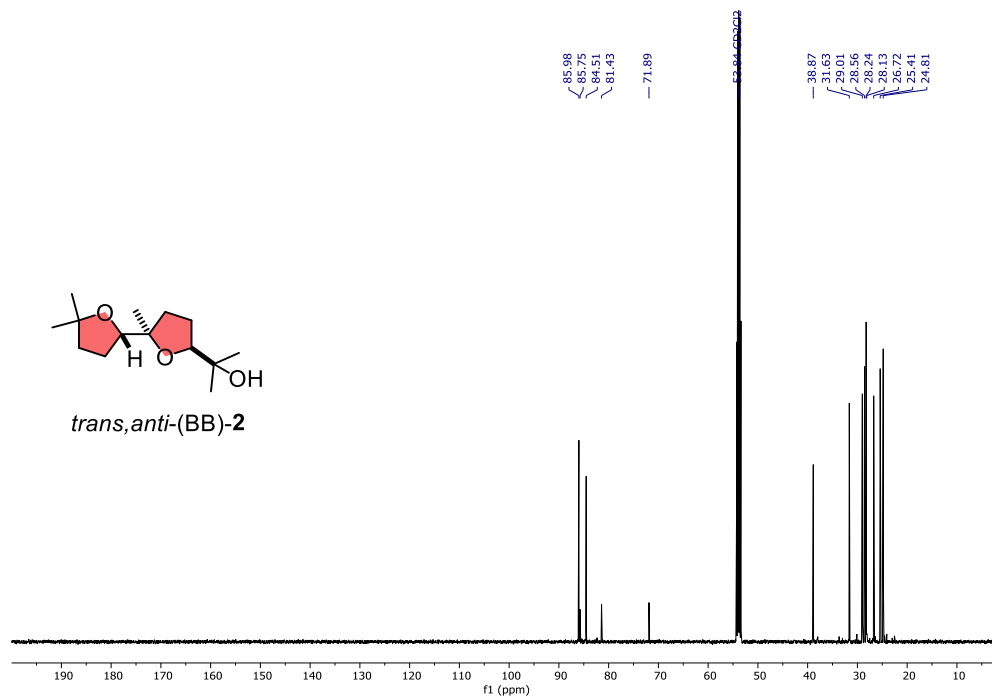

Figure S37. 125 MHz  $^{13}\text{C}$  NMR spectrum of *trans,anti*-(BB)-2 in  $\text{CD}_2\text{Cl}_2$ .

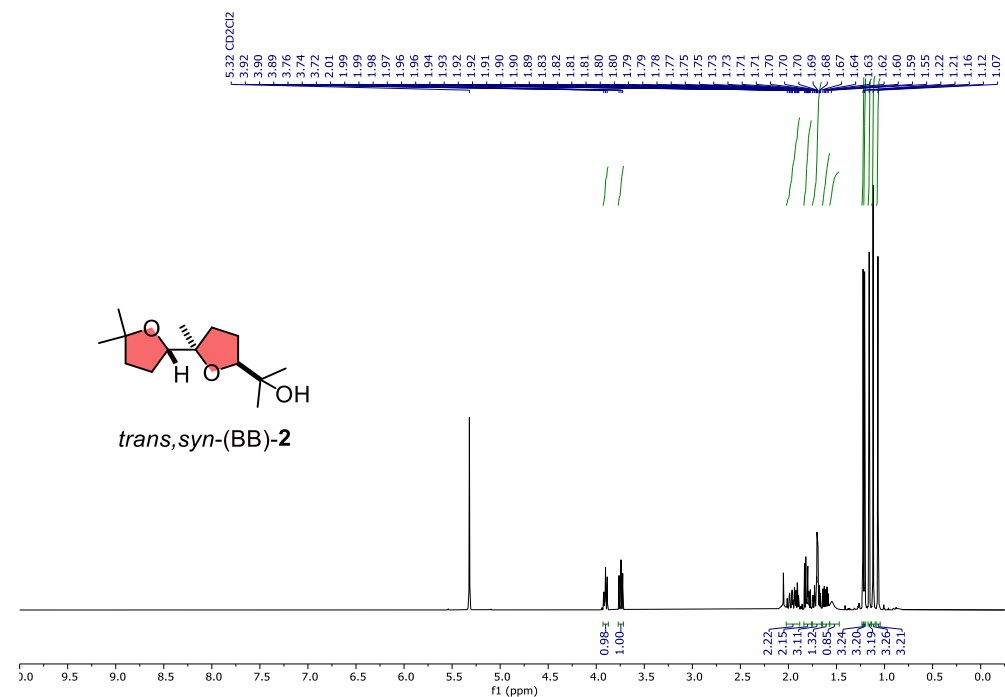

Figure S38. 400 MHz <sup>1</sup>H NMR spectrum of *trans,syn*-(BB)-2 in CD<sub>2</sub>Cl<sub>2</sub>.

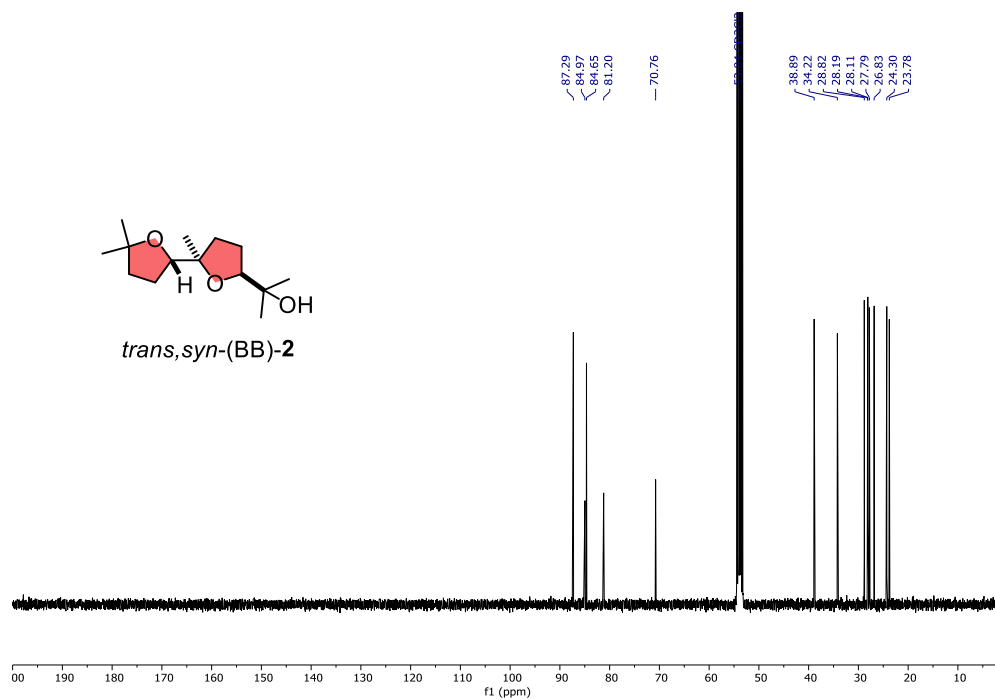

Figure S39. 100 MHz <sup>13</sup>C NMR spectrum of *trans,syn*-(BB)-2 in CD<sub>2</sub>Cl<sub>2</sub>.



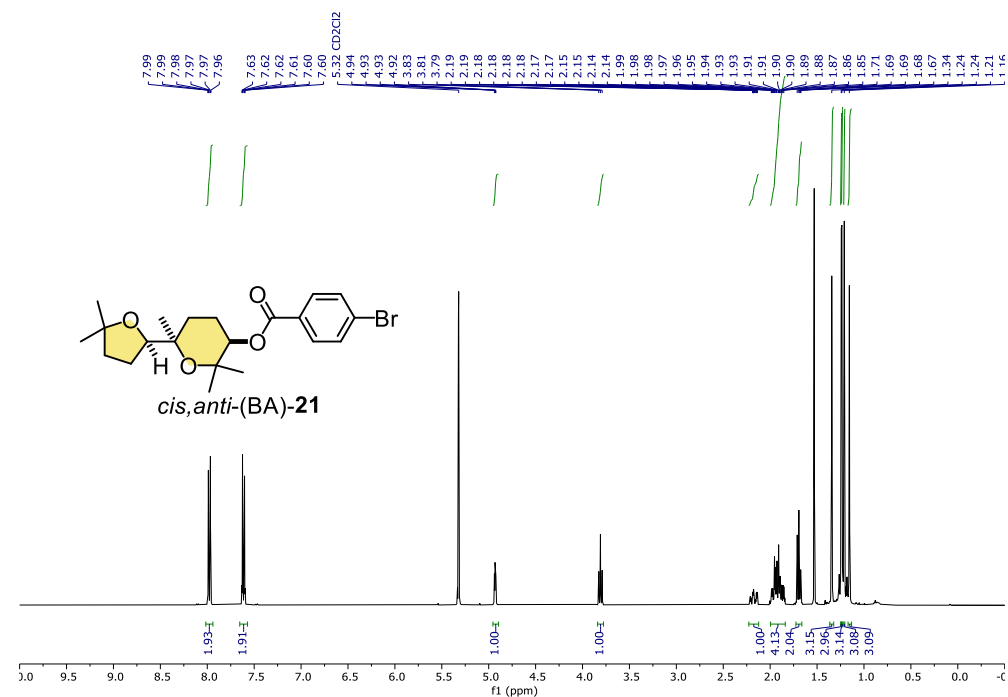

Figure S40. 400 MHz  $^1\text{H}$  NMR spectrum of *cis,anti*-(BA)-21 in  $\text{CD}_2\text{Cl}_2$ .

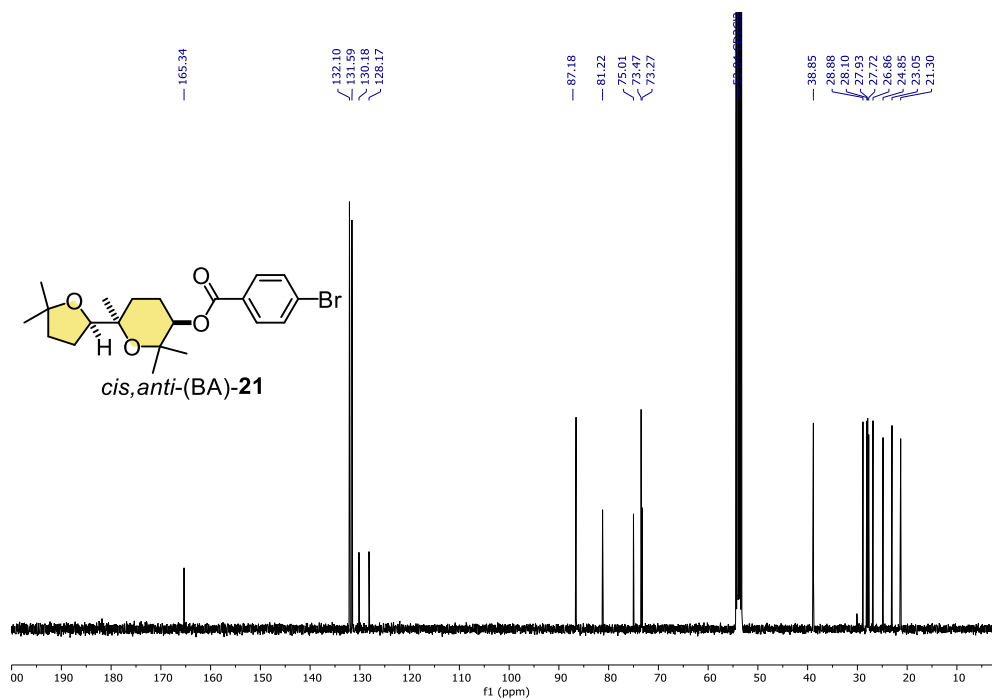

Figure S41. 100 MHz  $^{13}\text{C}$  NMR spectrum of spectrum of *cis,anti*-(BA)-21 in  $\text{CD}_2\text{Cl}_2$ .



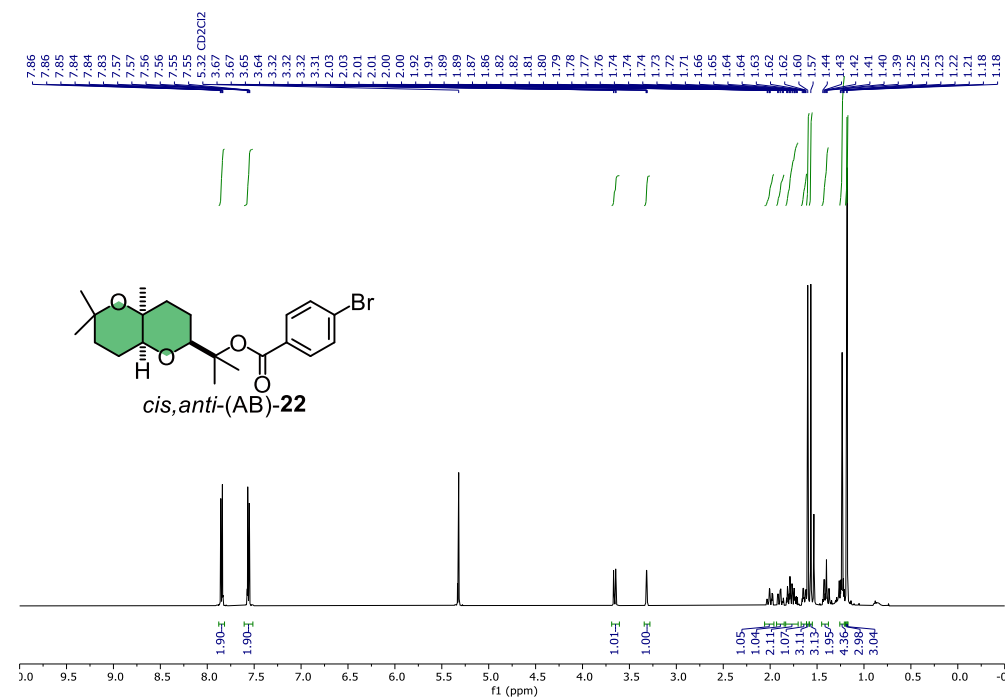

Figure S44. 500 MHz spectrum of *cis,anti*-(AB)-**22** in CD<sub>2</sub>Cl<sub>2</sub>.

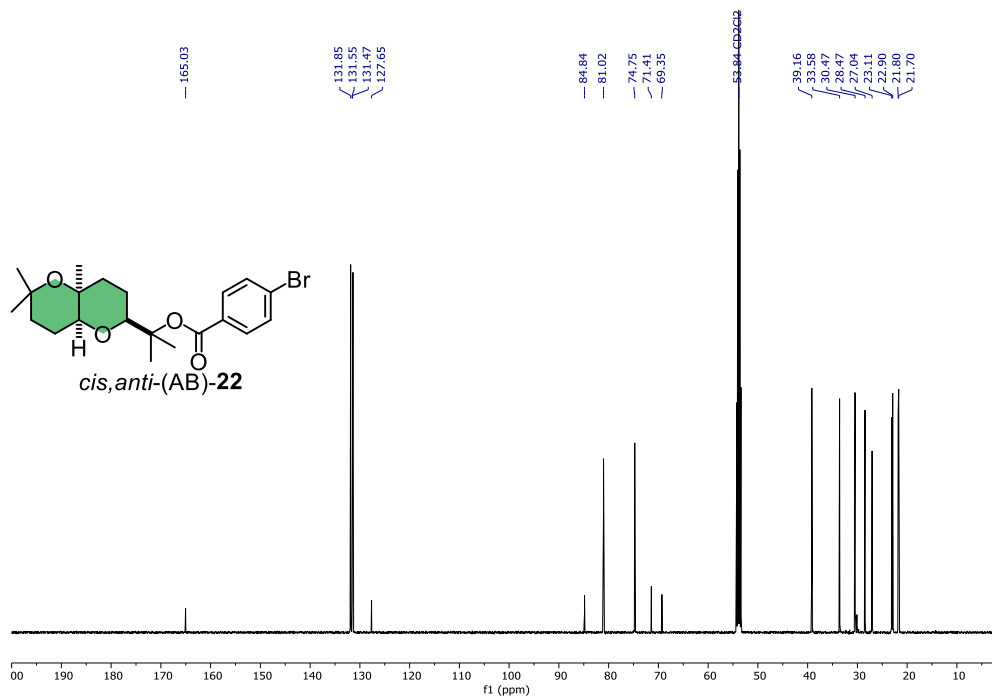

Figure S45. 125 MHz <sup>13</sup>C NMR spectrum of *cis,anti*-(AB)-**22** in CD<sub>2</sub>Cl<sub>2</sub>.

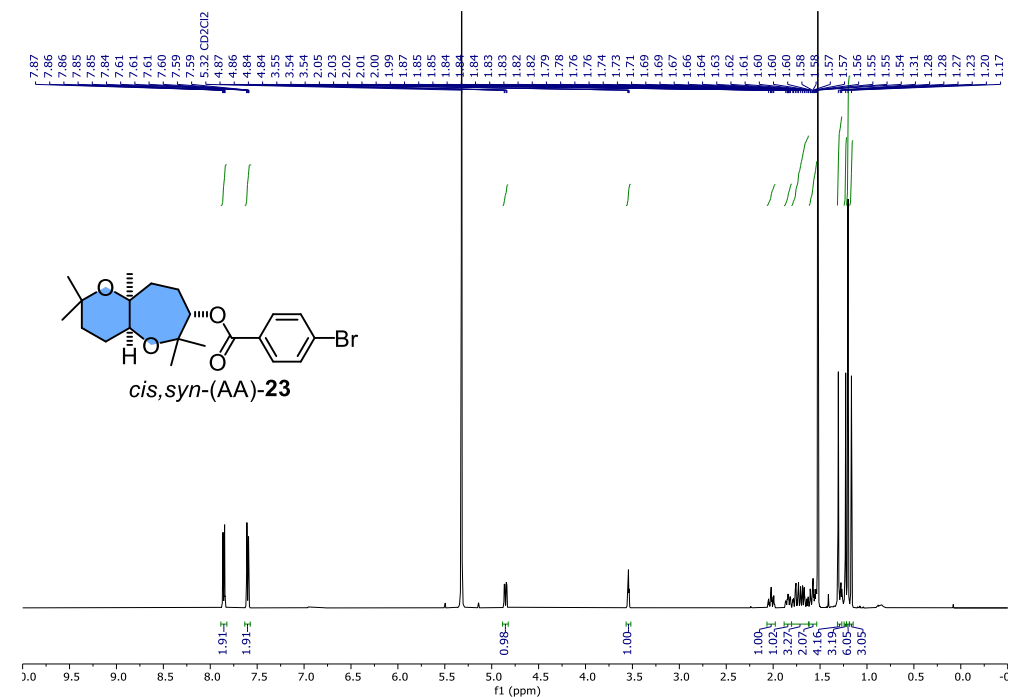

Figure S46. 500 MHz  $^1\text{H}$  NMR spectrum of *cis,syn*-(AA)-**23** in  $\text{CD}_2\text{Cl}_2$ .

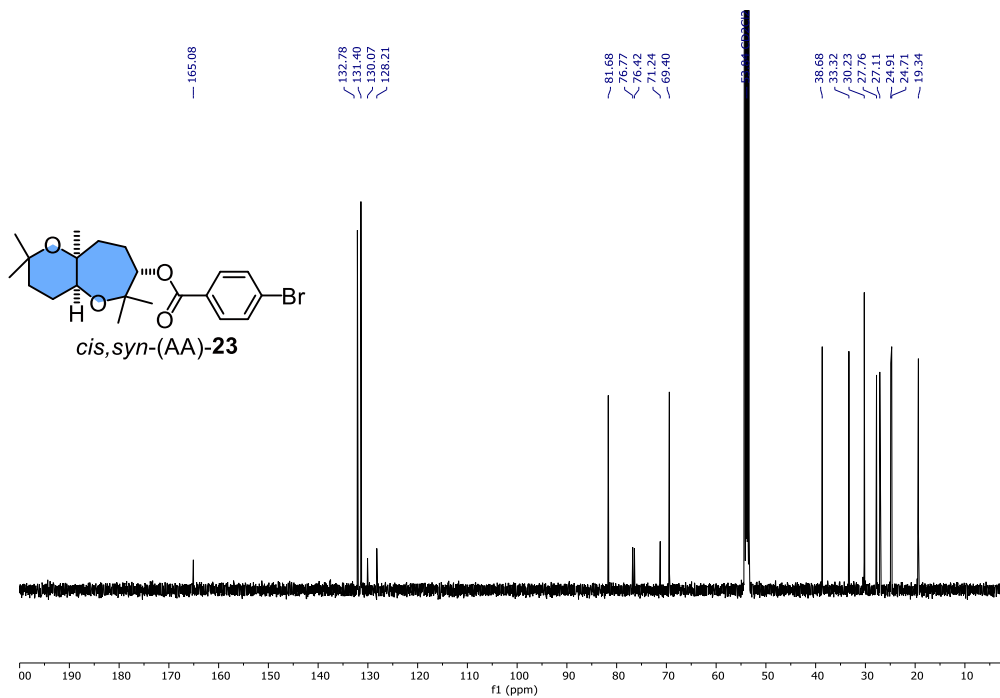

Figure S47. 125 MHz  $^{13}\text{C}$  NMR spectrum of *cis,syn*-(AA)-**23** in  $\text{CD}_2\text{Cl}_2$ .

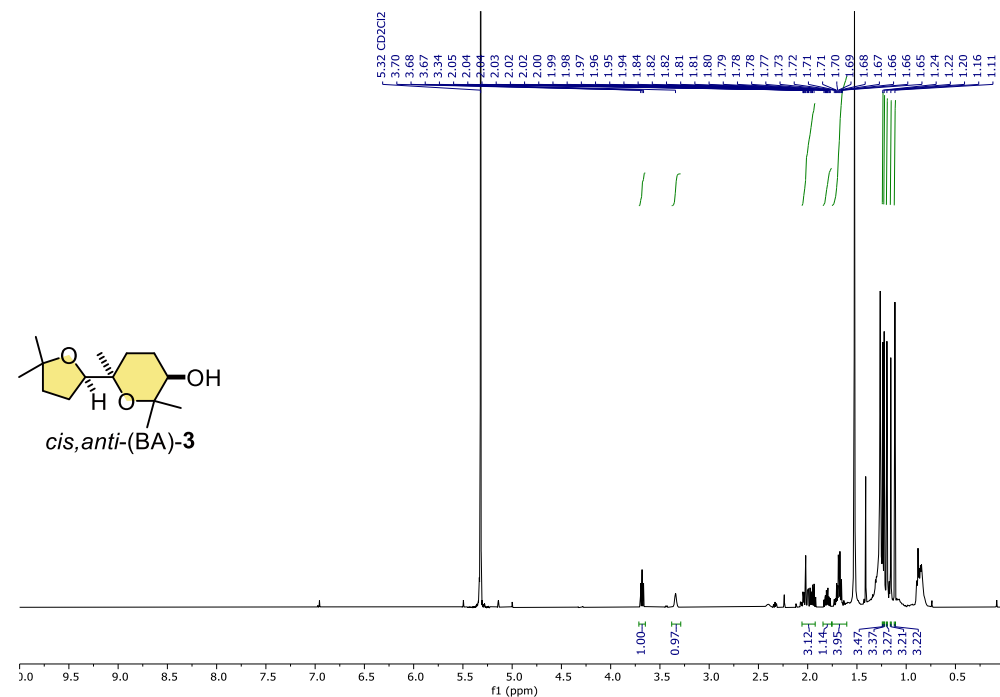

**Figure S48.** 500 MHz  $^1\text{H}$  NMR spectrum of *cis,anti*-(BA)-3 in  $\text{CD}_2\text{Cl}_2$ .

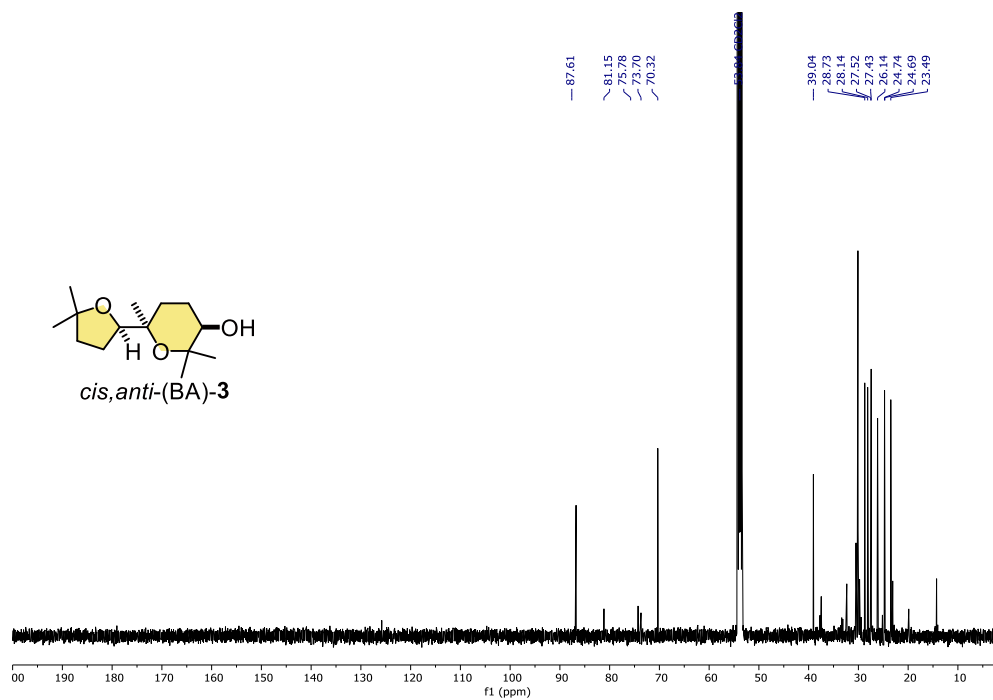

**Figure S49.** 125 MHz  $^{13}\text{C}$  NMR spectrum of *cis,anti*-(BA)-3 in  $\text{CD}_2\text{Cl}_2$ .

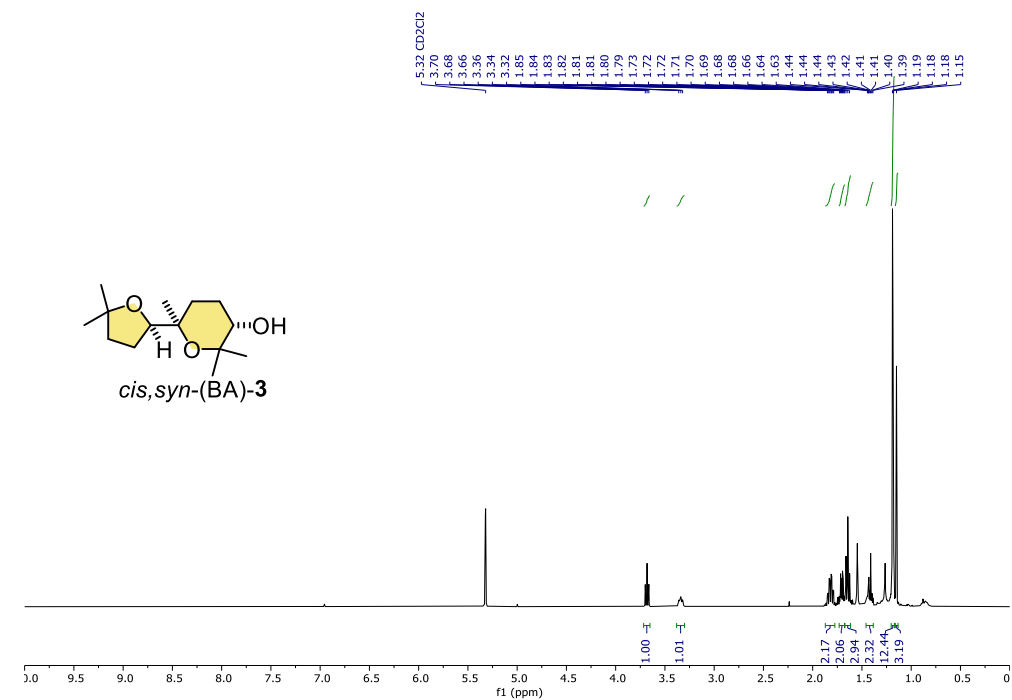

**Figure S50.** 400 MHz <sup>1</sup>H NMR spectrum of *cis,syn*-(BA)-3 in CD<sub>2</sub>Cl<sub>2</sub>.

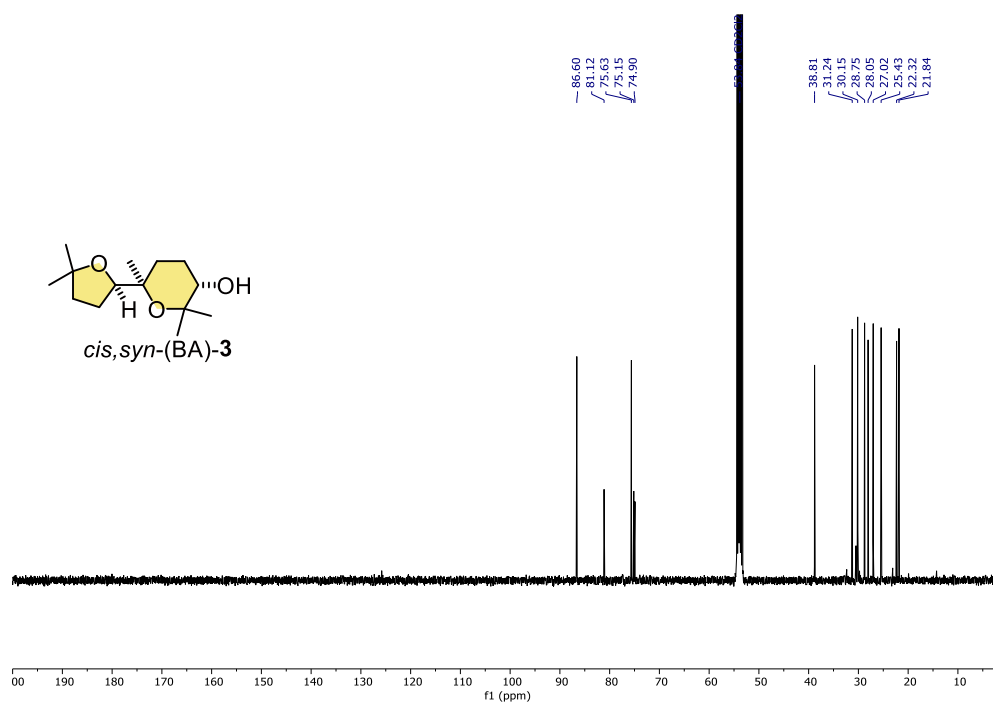

**Figure S51.** 100 MHz <sup>13</sup>C NMR spectrum of *cis,syn*-(BA)-3 in CD<sub>2</sub>Cl<sub>2</sub>.

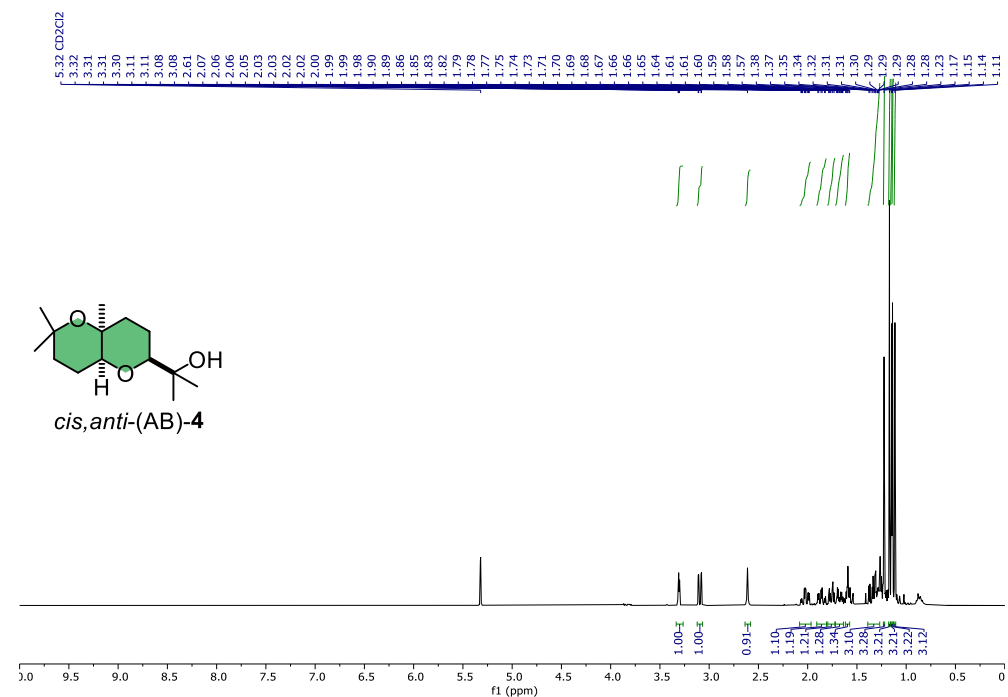

Figure S52. 400 MHz  $^1\text{H}$  NMR spectrum of *cis,anti*-(AB)-4 in  $\text{CD}_2\text{Cl}_2$ .

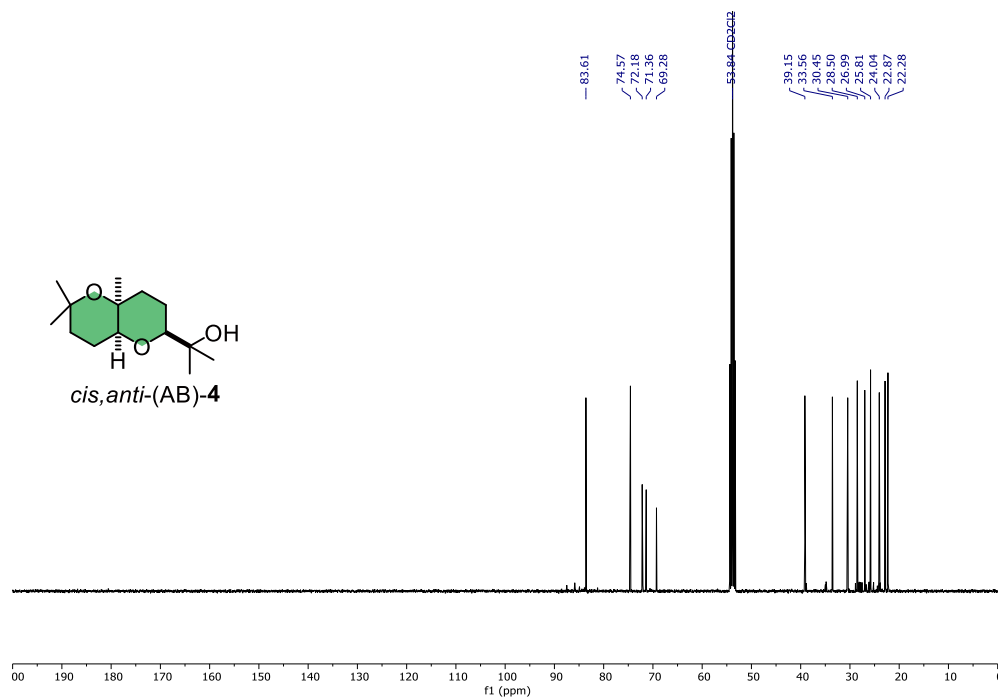

Figure S53. 100 MHz  $^{13}\text{C}$  NMR spectrum of *cis,anti*-(AB)-4 in  $\text{CD}_2\text{Cl}_2$ .

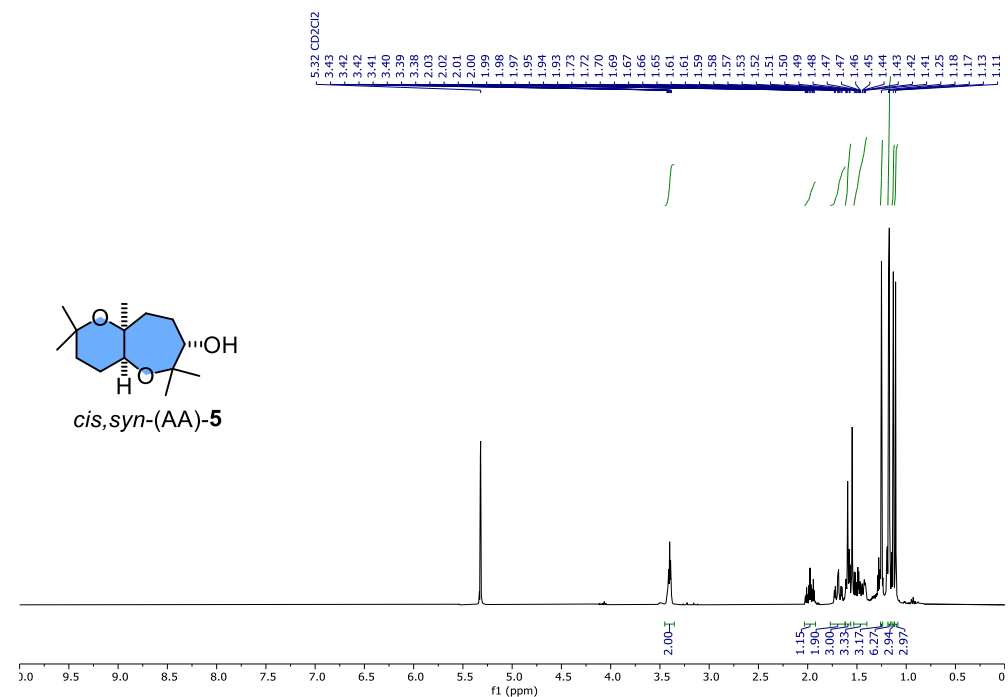

**Figure S54.** 400 MHz  $^1\text{H}$  NMR spectrum of *cis,syn*-(AA)-5 in  $\text{CD}_2\text{Cl}_2$ .

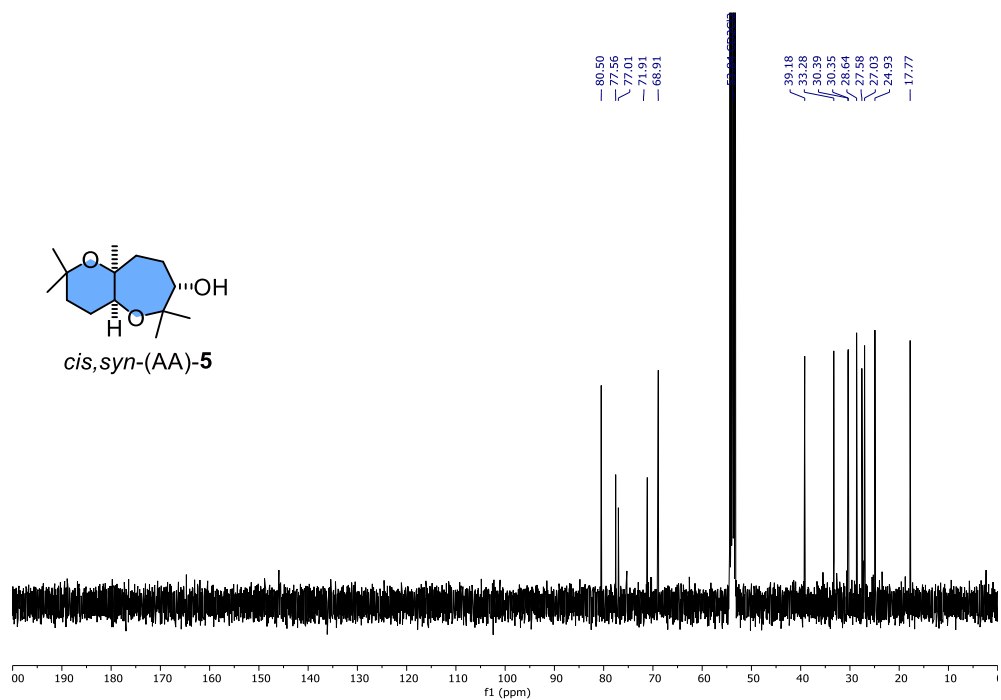

**Figure S55.** 100 MHz  $^{13}\text{C}$  NMR spectrum of *cis,syn*-(AA)-5 in  $\text{CD}_2\text{Cl}_2$ .



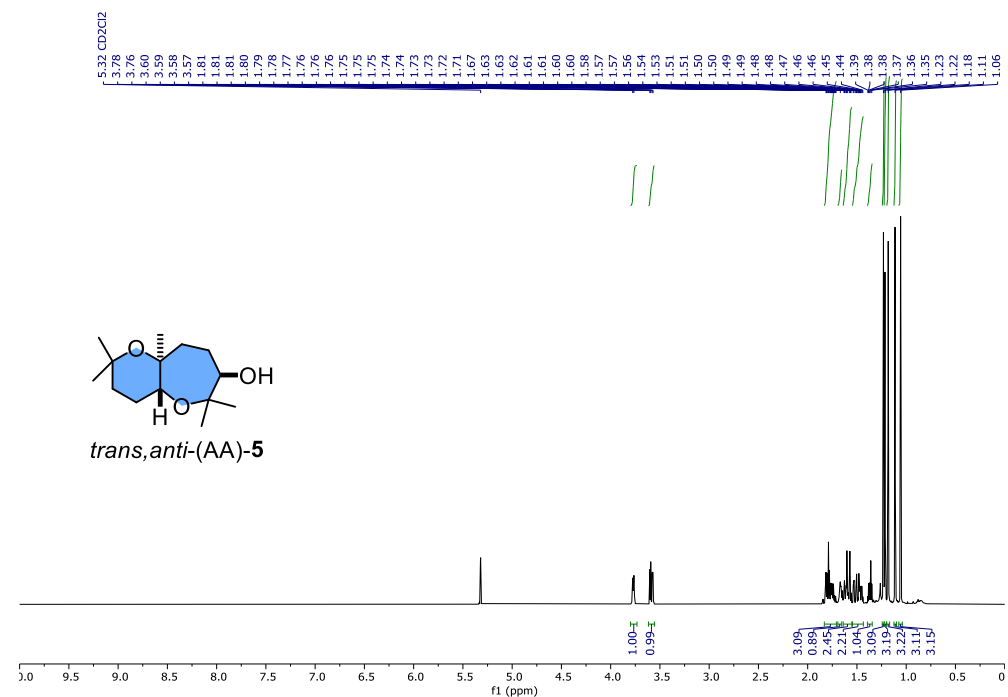

**Figure S56.** 500 MHz  $^1\text{H}$  NMR spectrum of *trans,anti*-(AA)-5 in  $\text{CD}_2\text{Cl}_2$ .

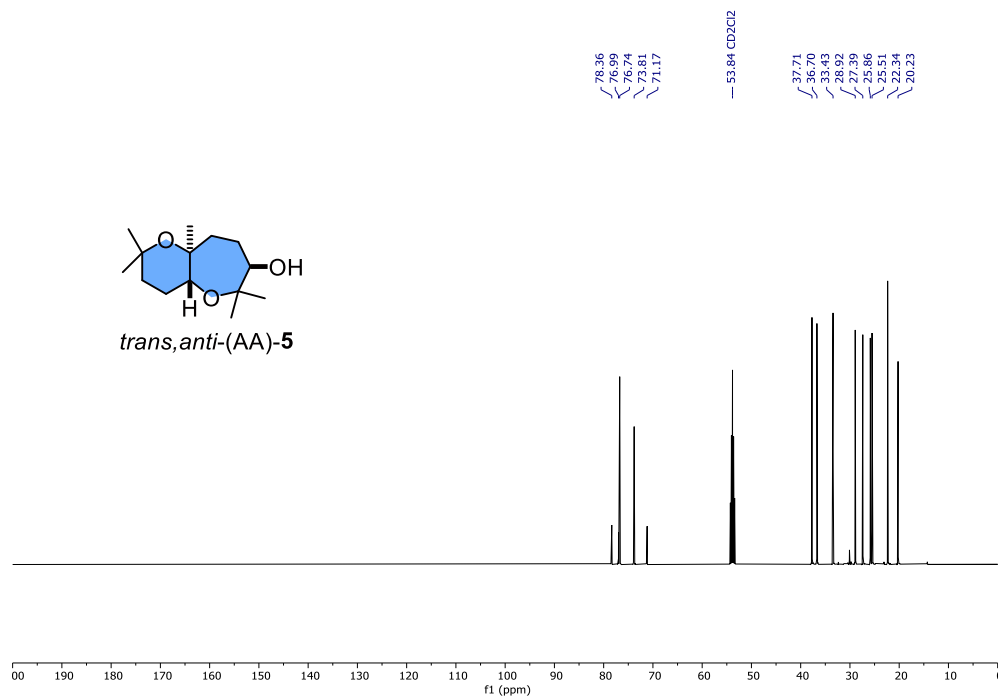

**Figure S57.** 125 MHz  $^{13}\text{C}$  NMR spectrum of *trans,anti*-(AA)-5 in  $\text{CD}_2\text{Cl}_2$ .

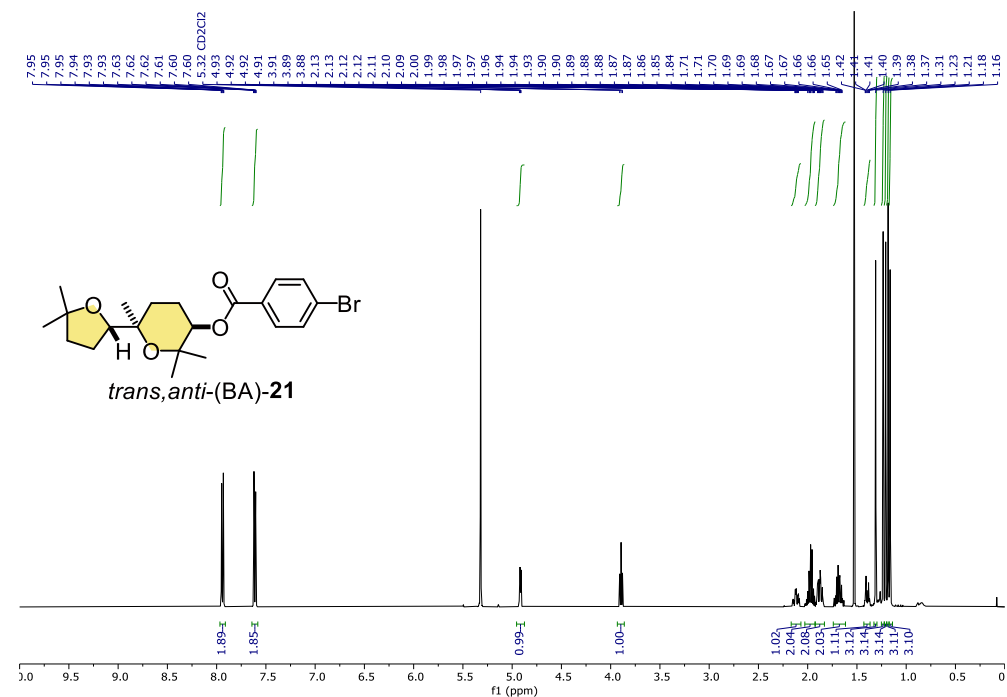

Figure S58. 500 MHz <sup>1</sup>H NMR spectrum of *trans,anti*-(BA)-21 in CD<sub>2</sub>Cl<sub>2</sub>.

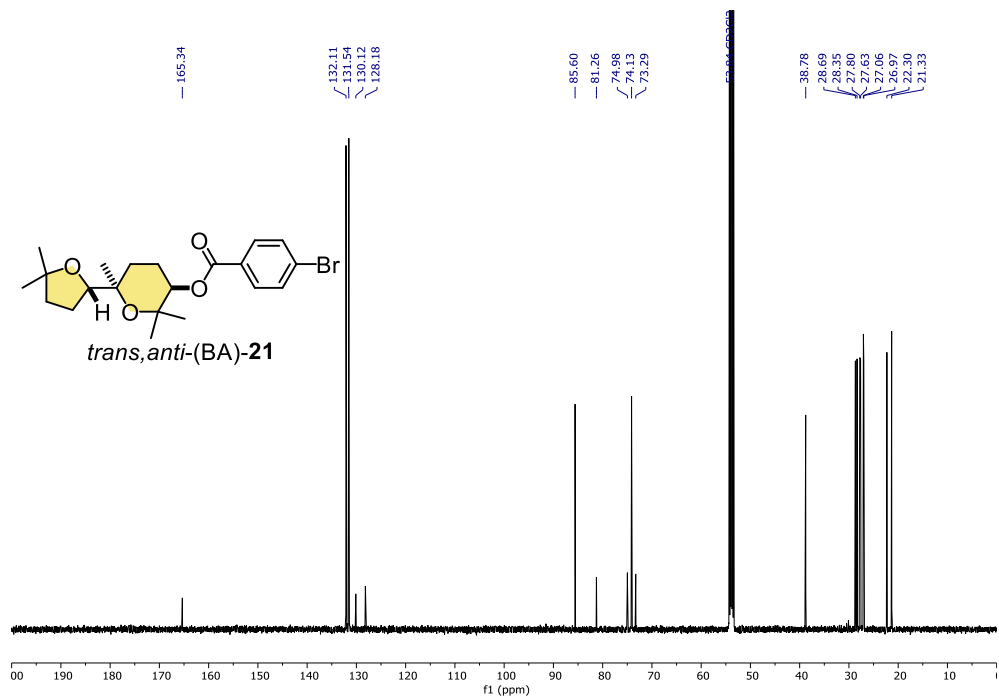

Figure S59. 125 MHz <sup>13</sup>C NMR spectrum of *trans,anti*-(BA)-21 in CD<sub>2</sub>Cl<sub>2</sub>.

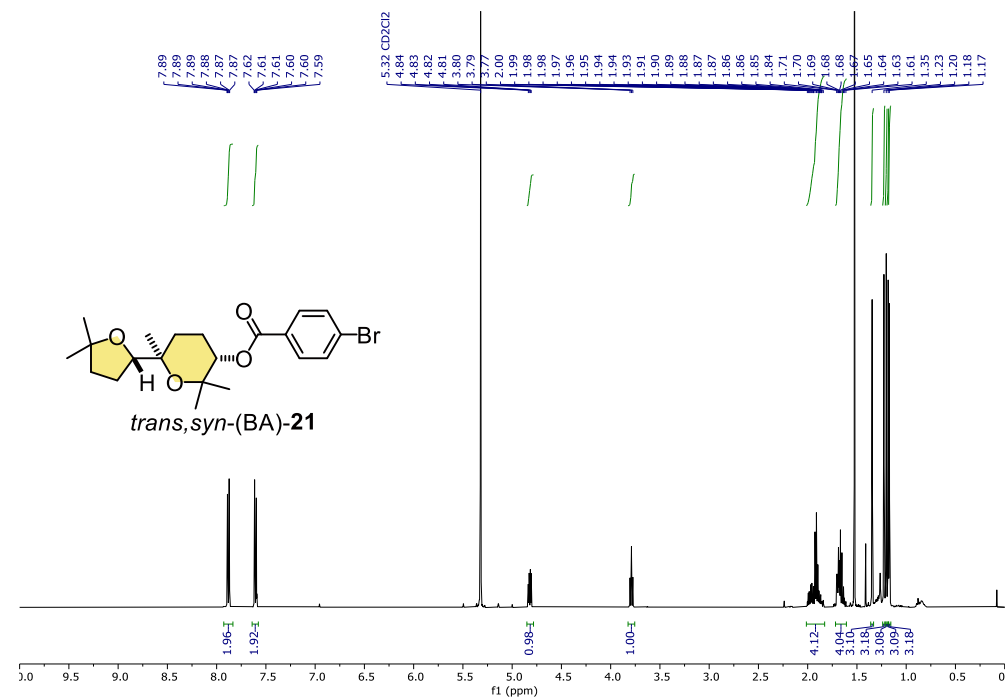

Figure S60. 500 MHz <sup>1</sup>H NMR spectrum of *trans,syn*-(BA)-21 in CD<sub>2</sub>Cl<sub>2</sub>.

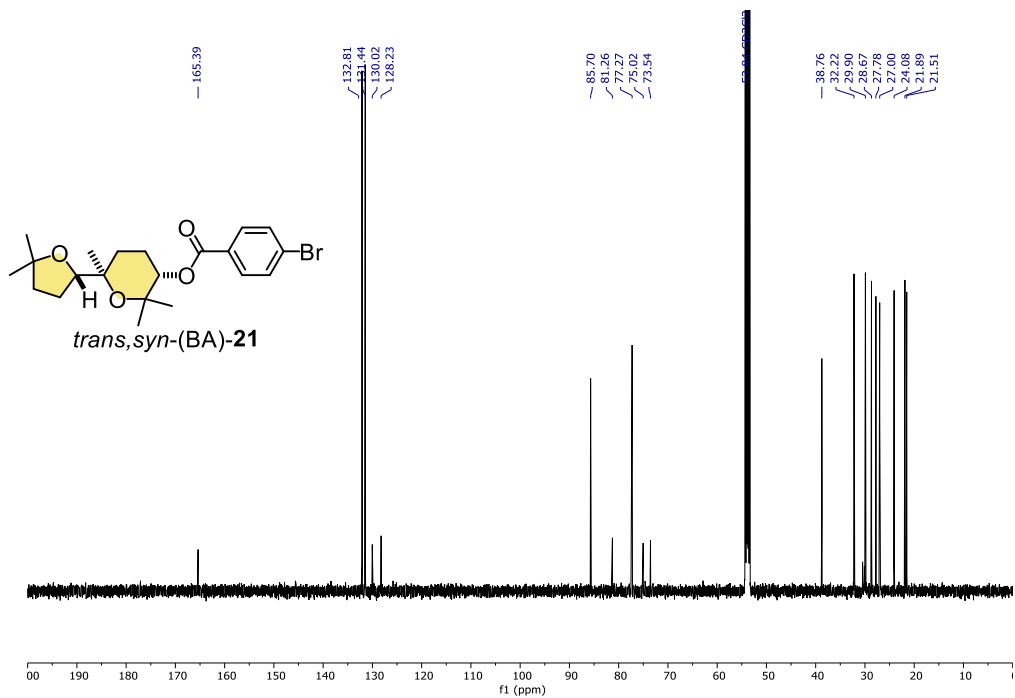

Figure S61. 125 MHz <sup>13</sup>C NMR spectrum of *trans,syn*-(BA)-21 in CD<sub>2</sub>Cl<sub>2</sub>.

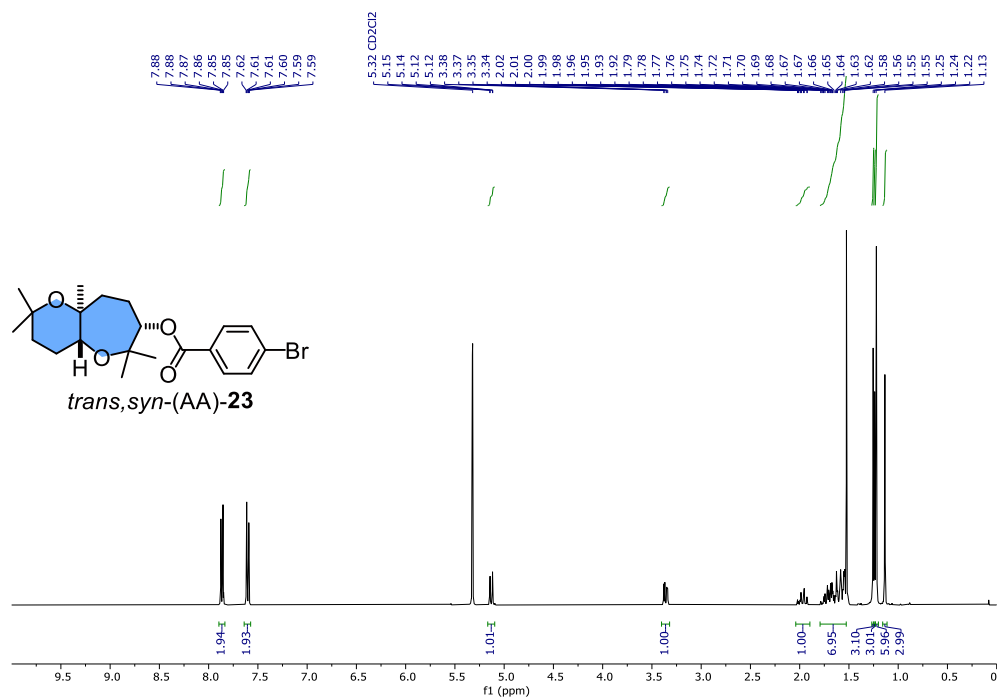

**Figure S62.** 400 MHz  $^1\text{H}$  NMR spectrum of *trans,syn*-(AA)-23 in  $\text{CD}_2\text{Cl}_2$ .

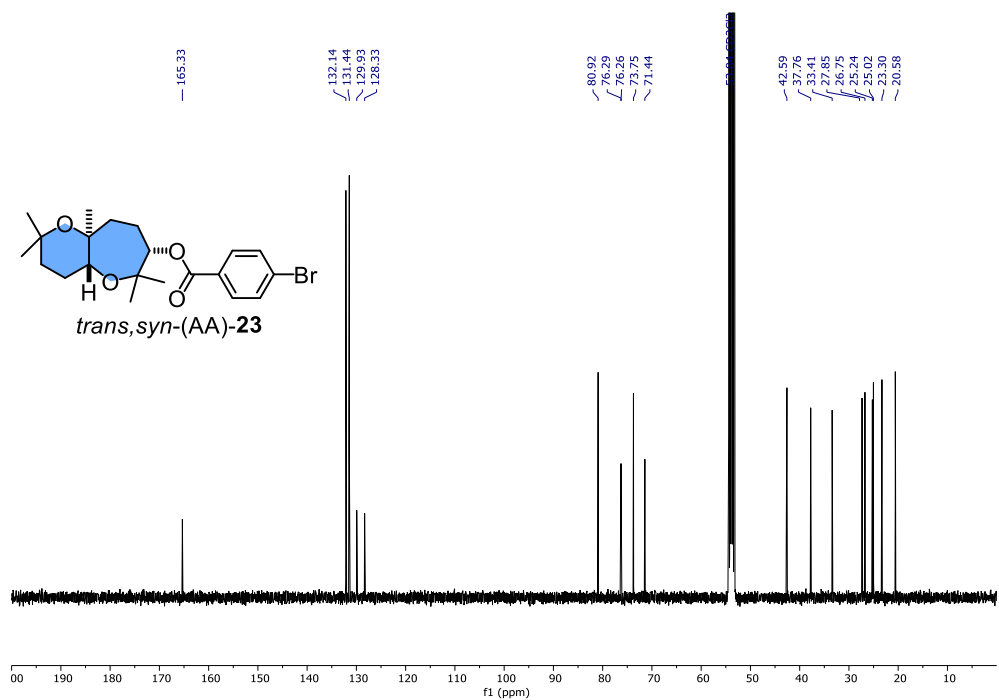

**Figure S63.** 100 MHz  $^{13}\text{C}$  NMR spectrum of *trans,syn*-(AA)-23 in  $\text{CD}_2\text{Cl}_2$ .

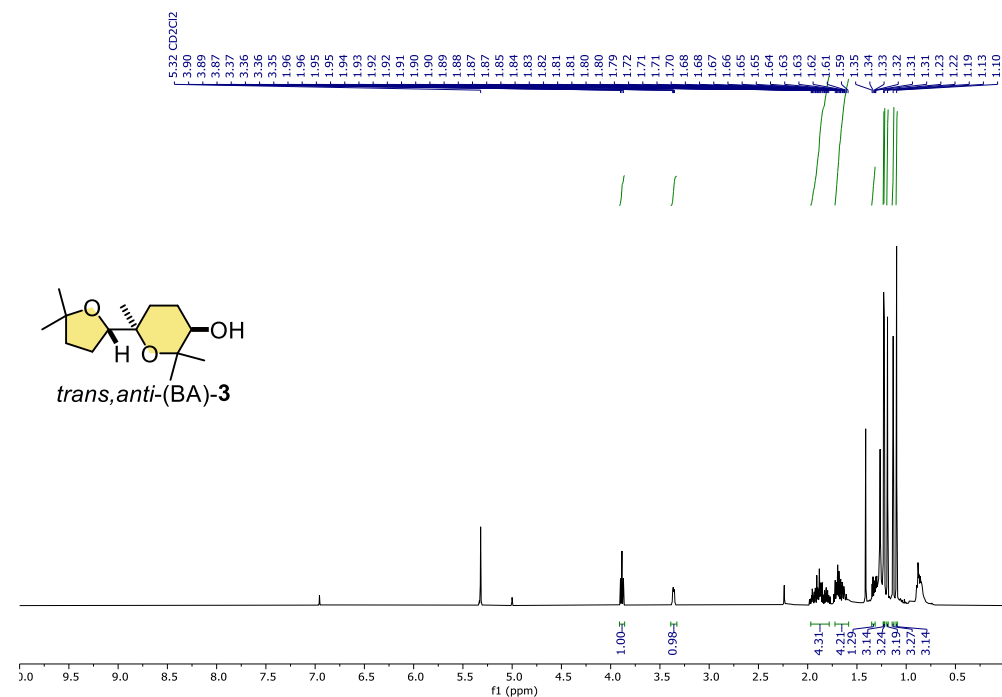

**Figure S64.** 500 MHz  $^1\text{H}$  NMR spectrum of *trans,anti*-(BA)-3 in  $\text{CD}_2\text{Cl}_2$ .

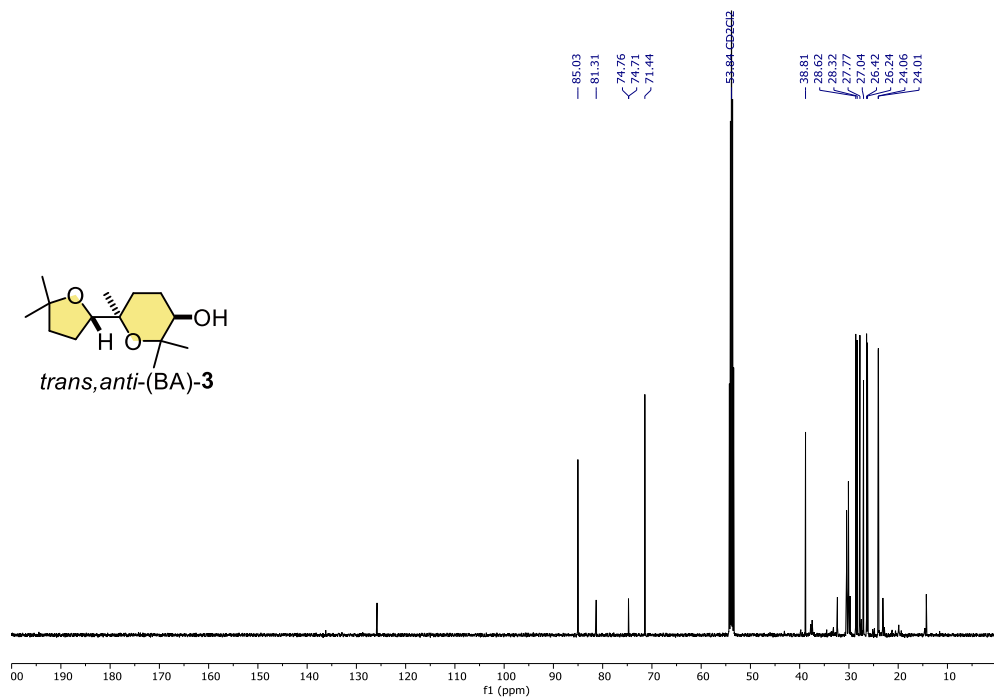

**Figure S65.** 125 MHz  $^{13}\text{C}$  NMR spectrum of *trans,anti*-(BA)-3 in  $\text{CD}_2\text{Cl}_2$ .

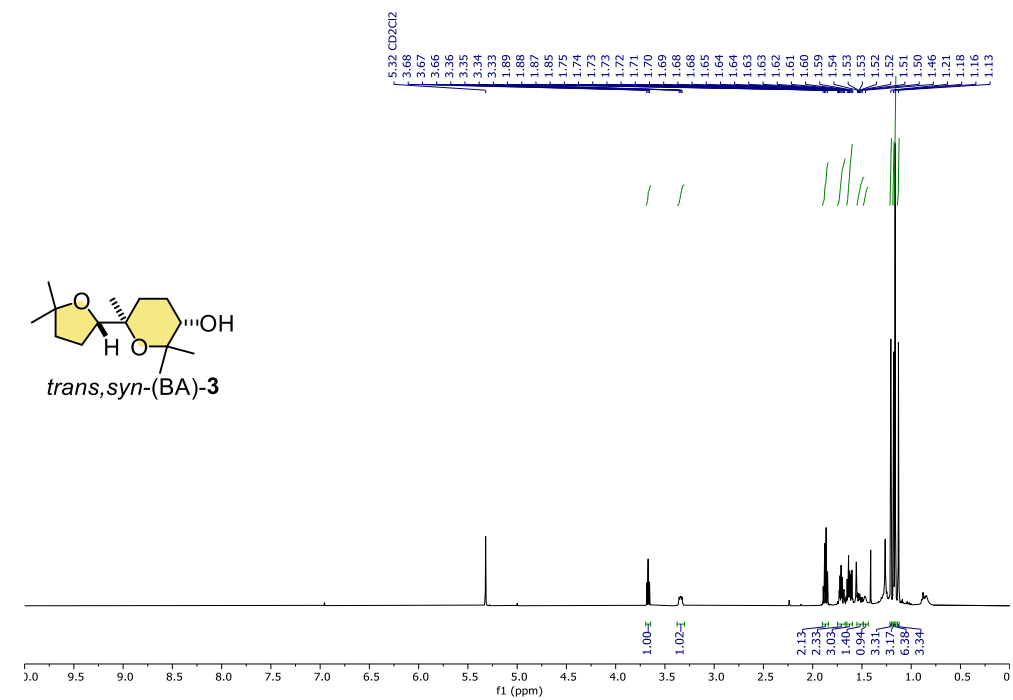

**Figure S66.** 500 MHz  $^1\text{H}$  NMR spectrum of *trans,syn*-(BA)-3 in  $\text{CD}_2\text{Cl}_2$ .

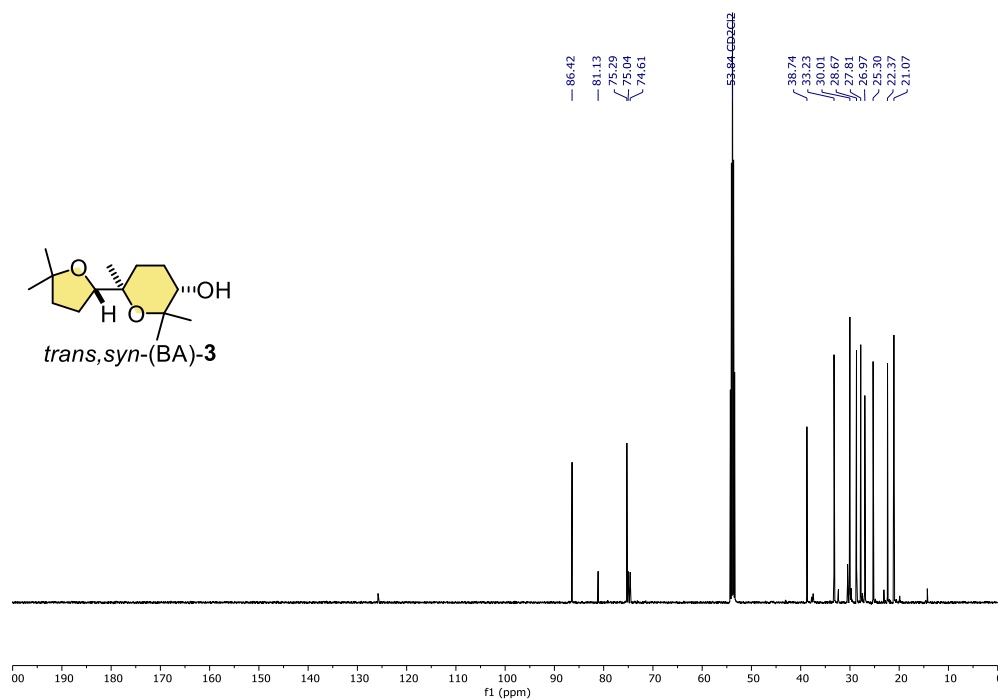

**Figure S67.** 125 MHz  $^{13}\text{C}$  NMR spectrum of *trans,syn*-(BA)-3 in  $\text{CD}_2\text{Cl}_2$ .

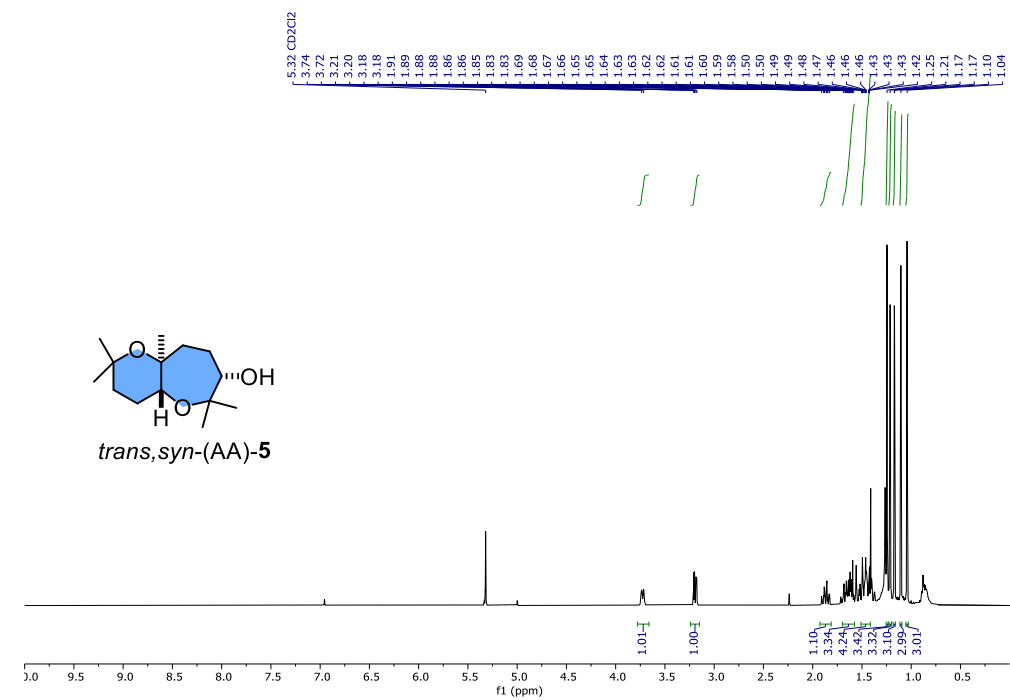

**Figure S68.** 500 MHz <sup>1</sup>H NMR spectrum of *trans,syn*-(AA)-5 in CD<sub>2</sub>Cl<sub>2</sub>.

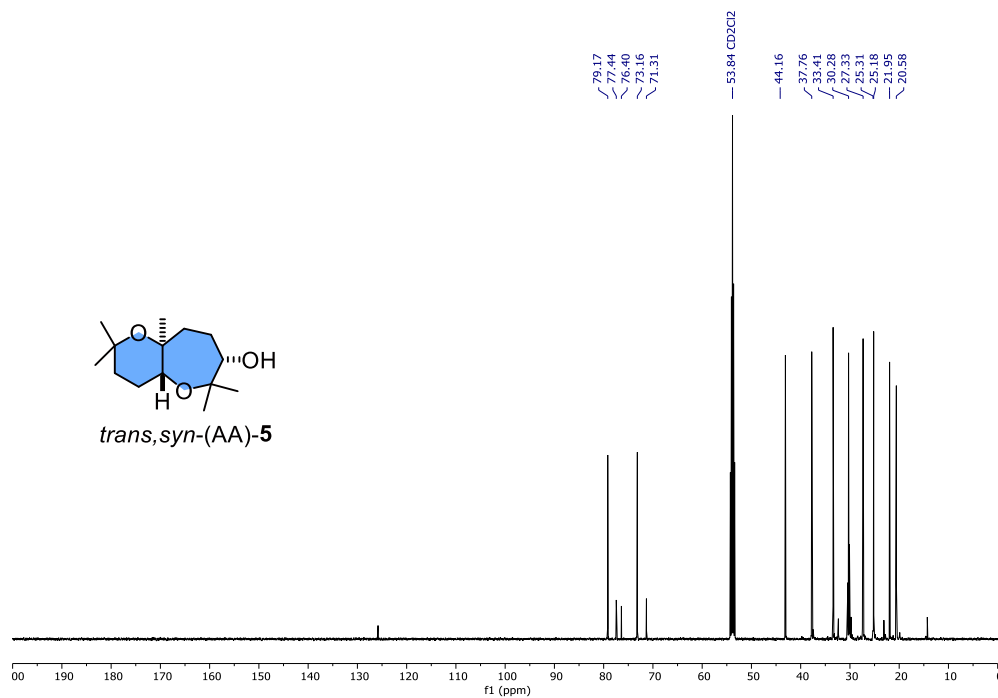

**Figure S69.** 125 MHz <sup>13</sup>C NMR spectrum of *trans,syn*-(AA)-5 in CD<sub>2</sub>Cl<sub>2</sub>.

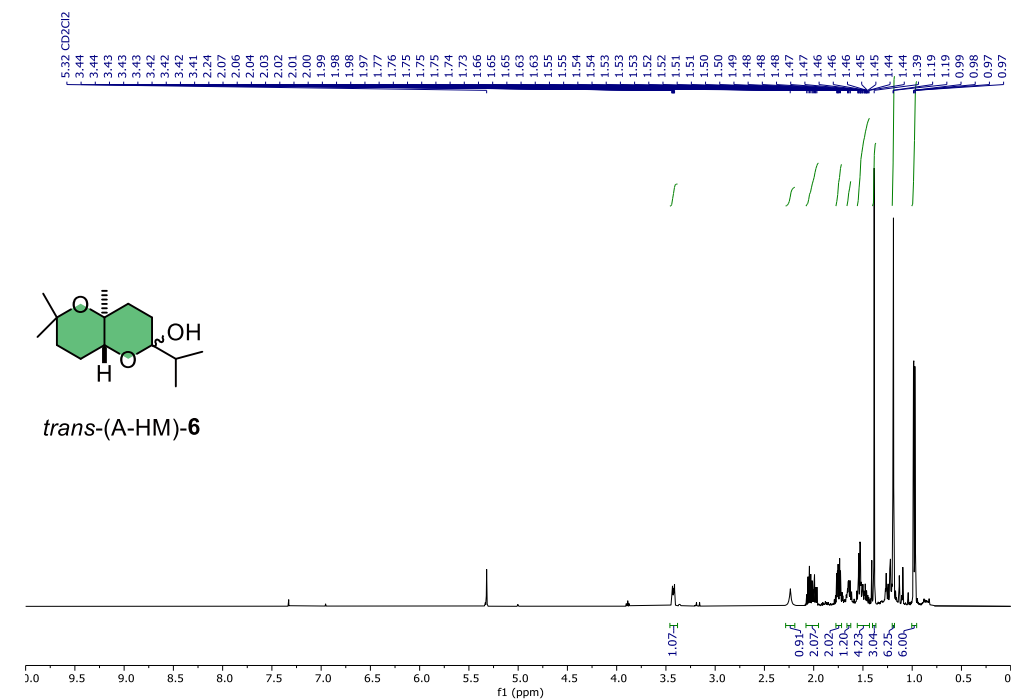

**Figure S70.** 500 MHz  $^1\text{H}$  NMR spectrum of *trans*-(A-HM)-6 in  $\text{CD}_2\text{Cl}_2$ .

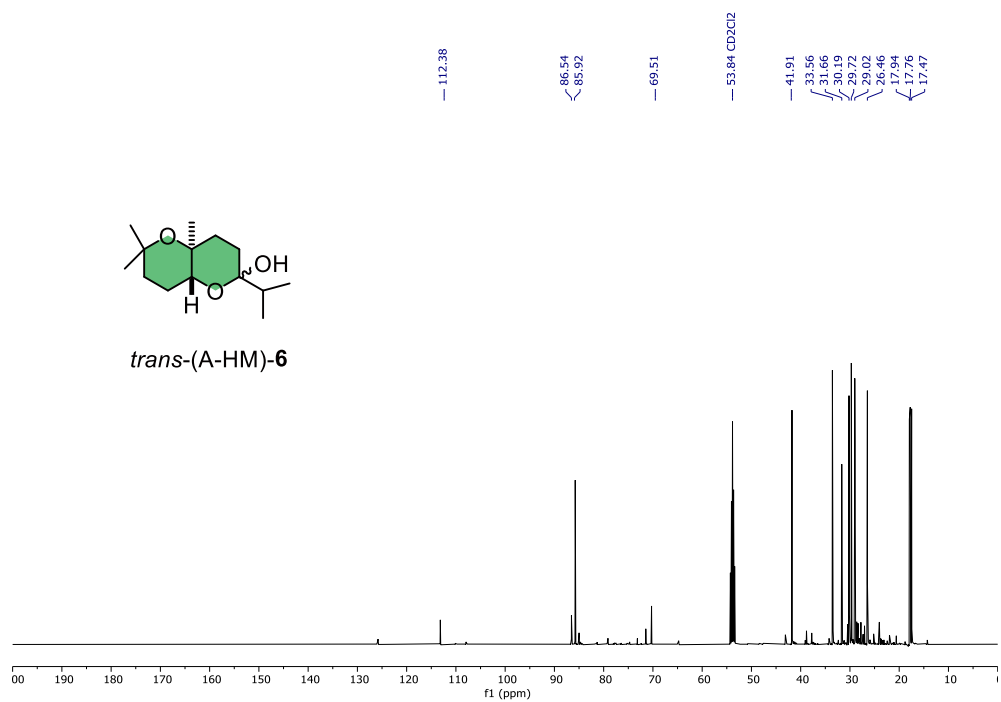

**Figure S71.** 125 MHz  $^{13}\text{C}$  NMR spectrum of *trans*-(A-HM)-6 in  $\text{CD}_2\text{Cl}_2$ .



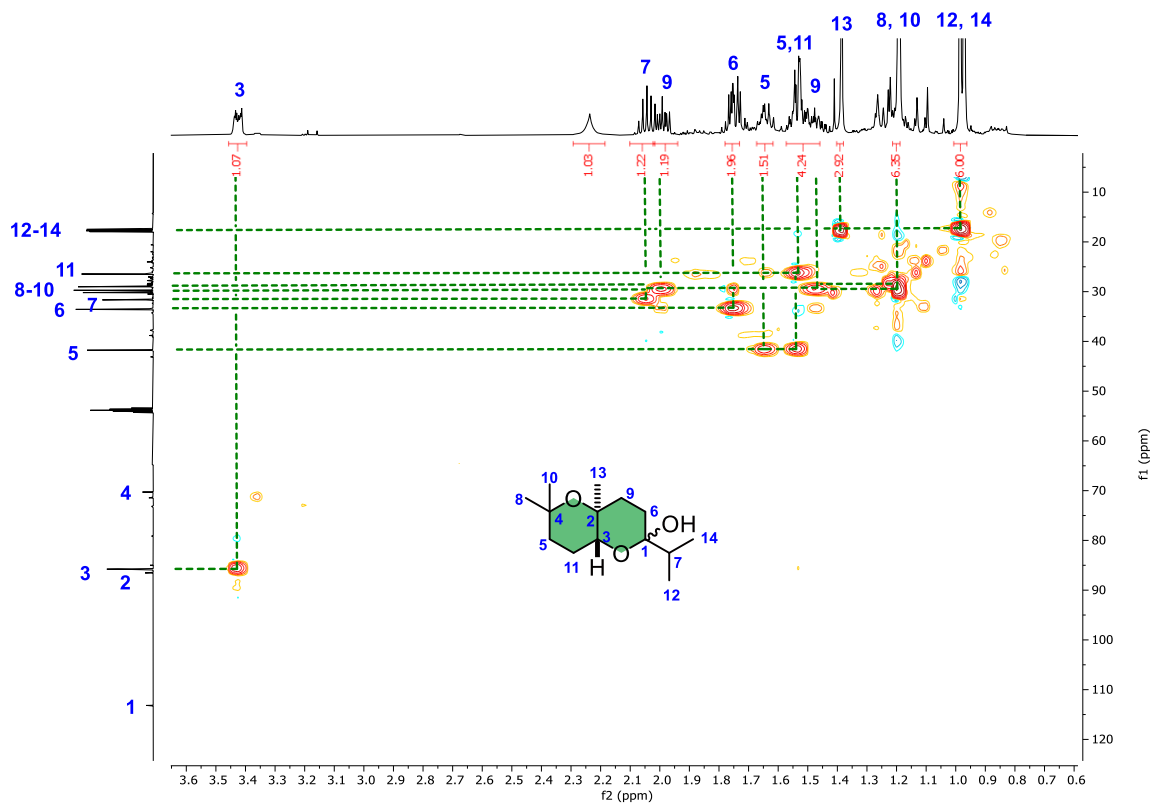

**Figure S72.** HSQC spectrum of *trans*-(A-HM)-6 in CD<sub>2</sub>Cl<sub>2</sub>.

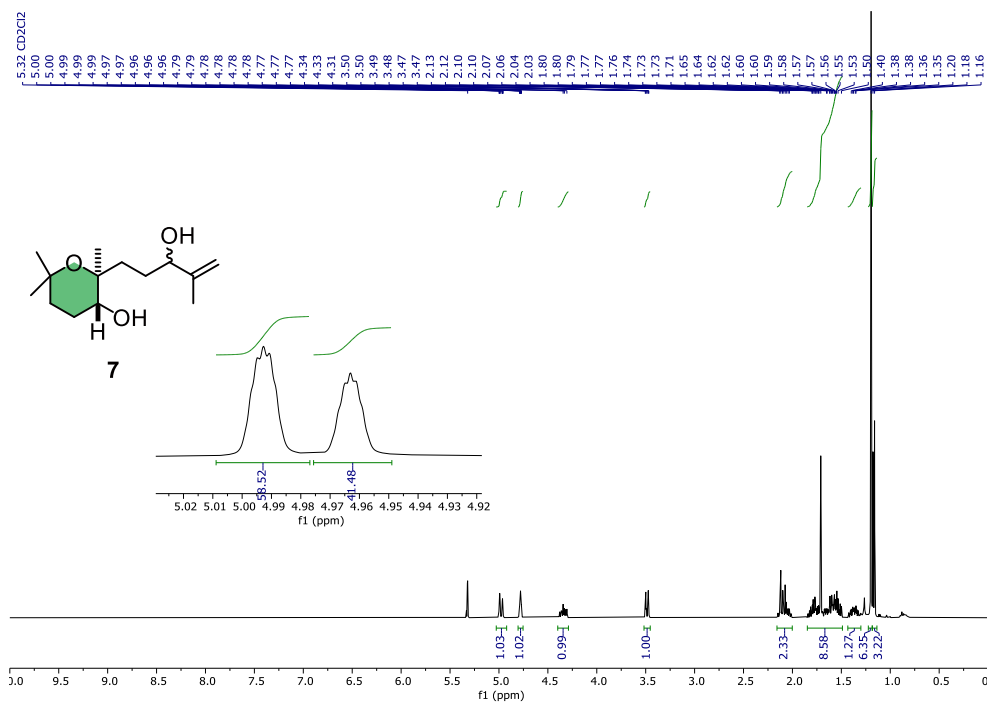

**Figure S73.** 400 MHz <sup>1</sup>H NMR spectrum of **7** in CD<sub>2</sub>Cl<sub>2</sub>.

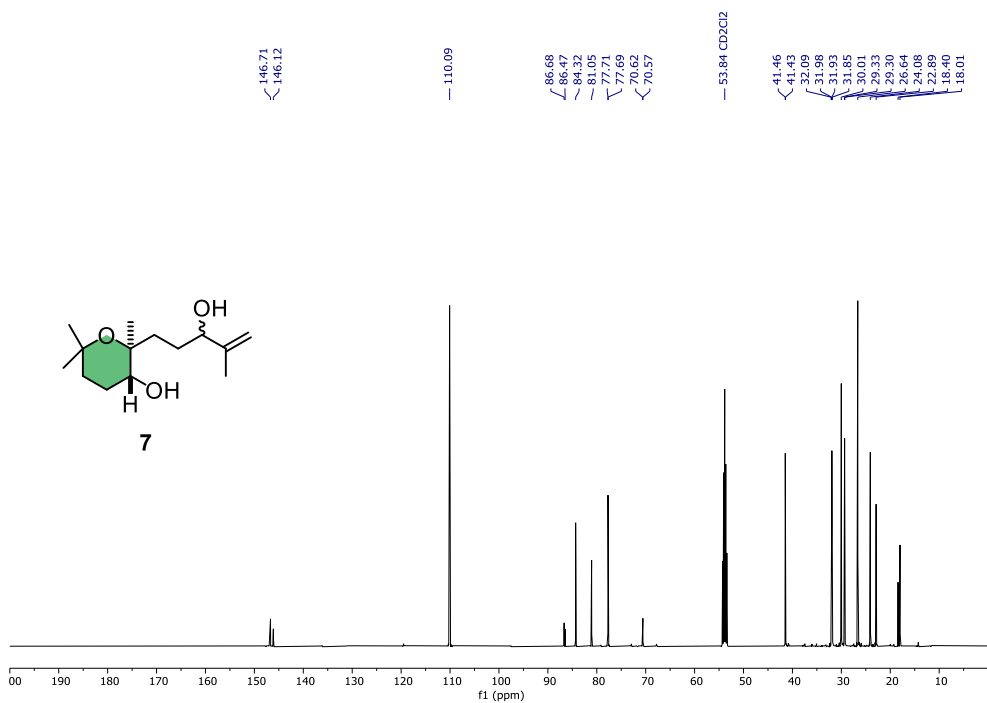

**Figure S74.** 100 MHz <sup>13</sup>C NMR spectrum of **7** in CD<sub>2</sub>Cl<sub>2</sub>.

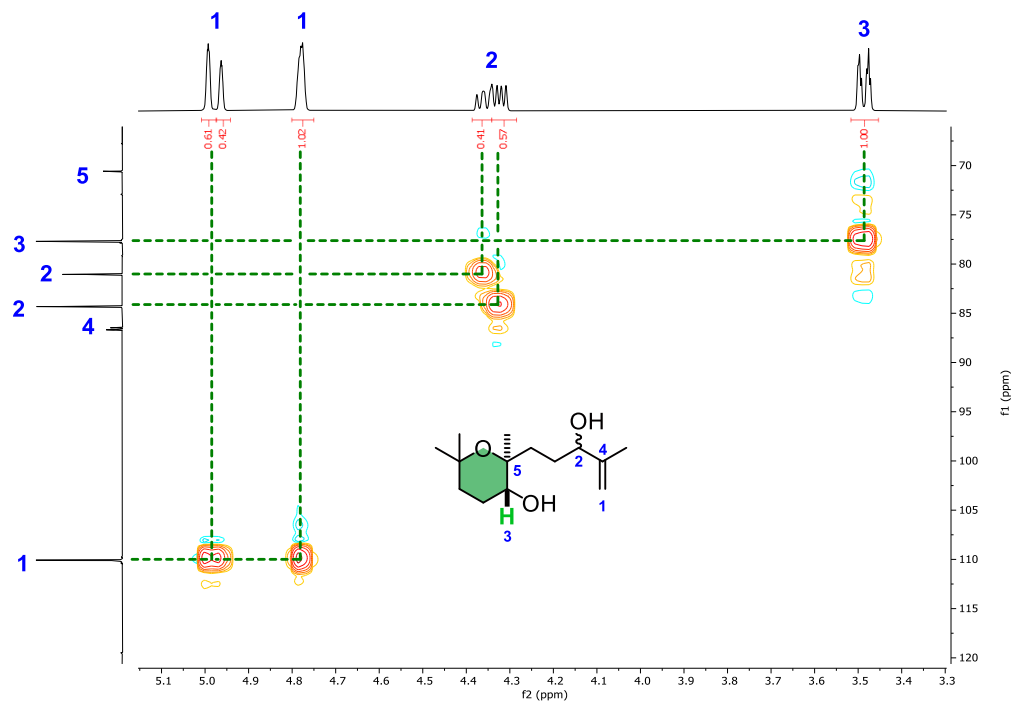

**Figure S75.** Zoomed HSQC spectrum of **7** in  $\text{CD}_2\text{Cl}_2$ .

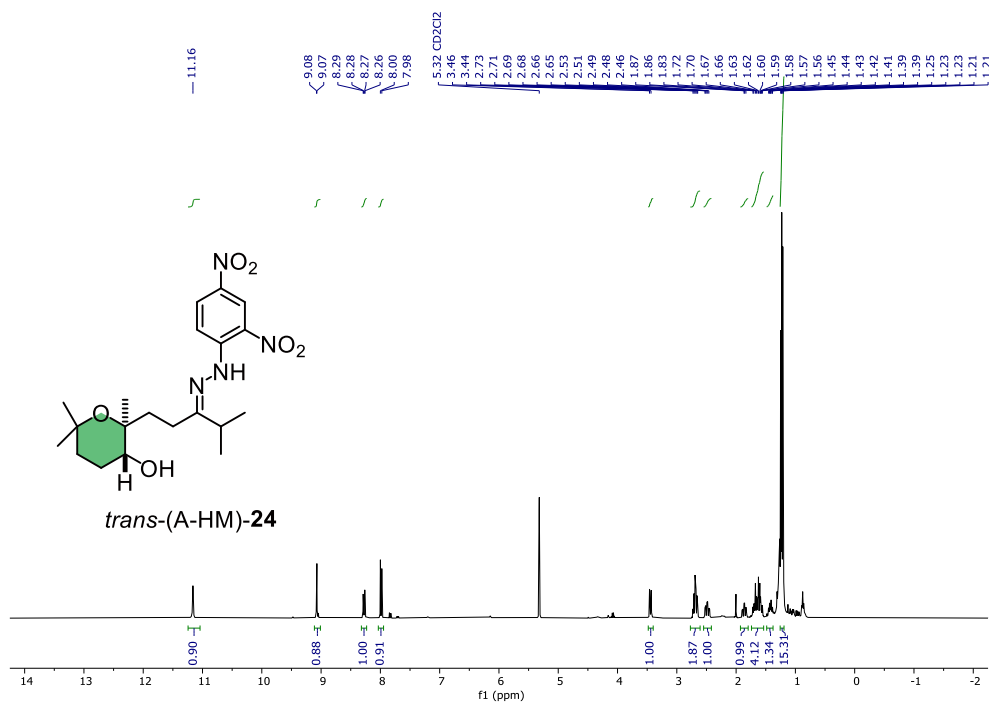

Figure S76. 400 MHz  $^1\text{H}$  NMR spectrum of *trans*-(A-HM)-24 in  $\text{CD}_2\text{Cl}_2$ .

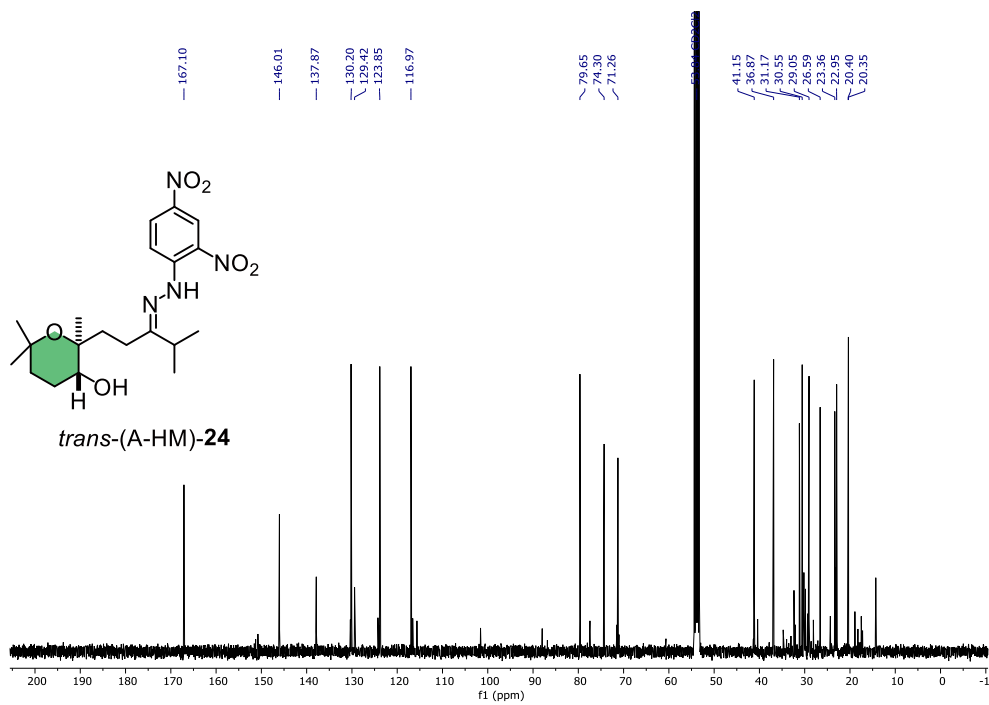

Figure S77. 100 MHz  $^{13}\text{C}$  NMR spectrum of *trans*-(A-HM)-24 in  $\text{CD}_2\text{Cl}_2$ .

## 7. X-ray crystallography

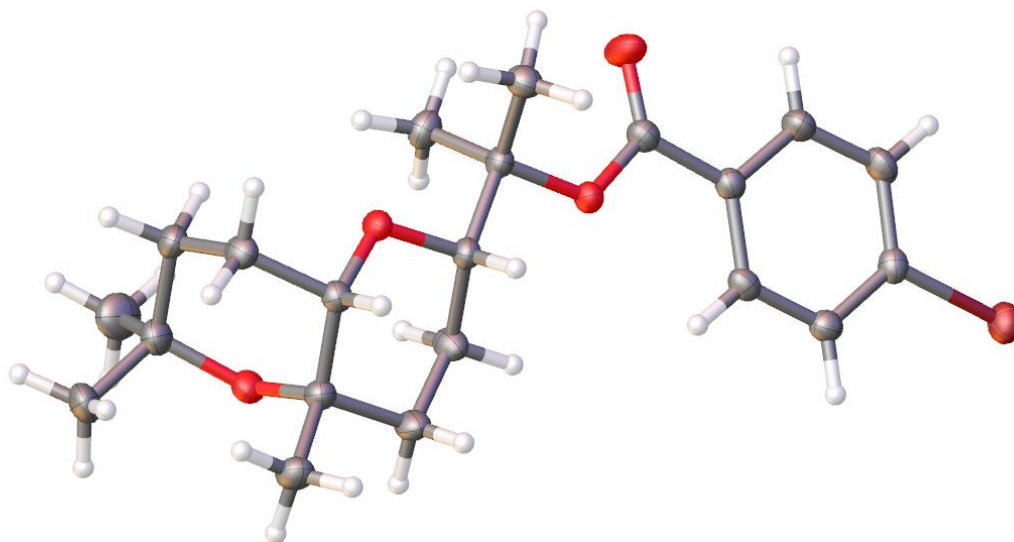

**Figure S78.** *cis,anti*-(AB)-22: View of the molecule (displacement ellipsoids drawn at 50 percent probability level).

**Table S3** Crystal data and structure refinement for *cis,anti*-(AB)-22.

|                      |                                                  |                 |
|----------------------|--------------------------------------------------|-----------------|
| CCDC number          | 2176606                                          |                 |
| Empirical formula    | C <sub>21</sub> H <sub>29</sub> BrO <sub>4</sub> |                 |
| Formula weight       | 425.35                                           |                 |
| Temperature          | 119.99(10) K                                     |                 |
| Wavelength           | 1.54184 Å                                        |                 |
| Crystal system       | Monoclinic                                       |                 |
| Space group          | P 1 21/c 1                                       |                 |
| Unit cell dimensions | a = 14.0432(5) Å                                 | α = 90°         |
|                      | b = 7.0309(3) Å                                  | β = 100.447(4)° |

|                                   |                                             |                     |
|-----------------------------------|---------------------------------------------|---------------------|
|                                   | $c = 21.1186(8) \text{ \AA}$                | $\gamma = 90^\circ$ |
| Volume                            | 2050.61(14) $\text{\AA}^3$                  |                     |
| Z                                 | 4                                           |                     |
| Density (calculated)              | 1.378 $\text{Mg/m}^3$                       |                     |
| Absorption coefficient            | 2.911 $\text{mm}^{-1}$                      |                     |
| F(000)                            | 888                                         |                     |
| Crystal size                      | 0.451 x 0.035 x 0.026 $\text{mm}^3$         |                     |
| Theta range for data collection   | 3.200 to 74.569°.                           |                     |
| Index ranges                      | -17 ≤ h ≤ 16, -8 ≤ k ≤ 7, -25 ≤ l ≤ 26      |                     |
| Reflections collected             | 30520                                       |                     |
| Independent reflections           | 4126 [R(int) = 0.0285]                      |                     |
| Completeness to theta = 67.684°   | 100.0 %                                     |                     |
| Absorption correction             | Gaussian                                    |                     |
| Max. and min. transmission        | 1.000 and 0.435                             |                     |
| Refinement method                 | Full-matrix least-squares on F <sup>2</sup> |                     |
| Data / restraints / parameters    | 4126 / 0 / 240                              |                     |
| Goodness-of-fit on F <sup>2</sup> | 1.072                                       |                     |
| Final R indices [I > 2σ(I)]       | R1 = 0.0264, wR2 = 0.0677                   |                     |
| R indices (all data)              | R1 = 0.0292, wR2 = 0.0691                   |                     |
| Extinction coefficient            | n/a                                         |                     |
| Largest diff. peak and hole       | 0.298 and -0.480 e. $\text{\AA}^{-3}$       |                     |

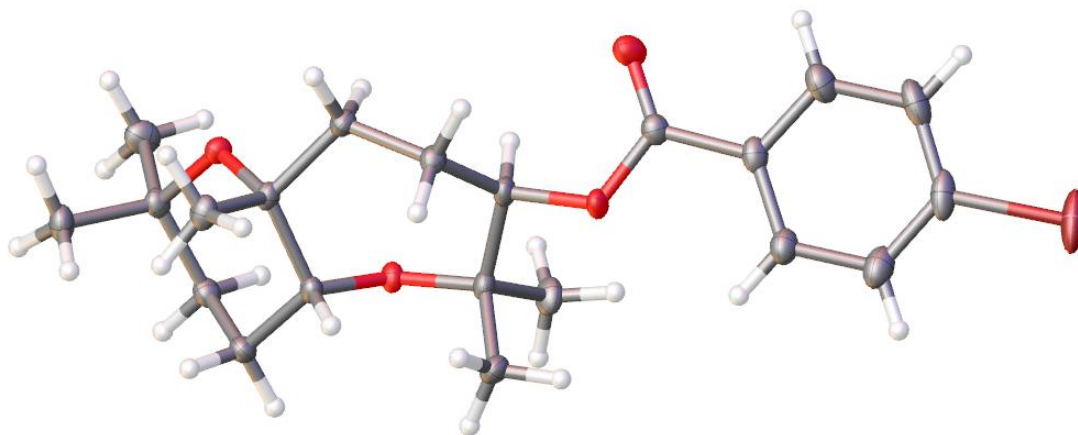

**Figure S79.** *cis,syn*-(AA)-**23**: View of the molecule (displacement ellipsoids drawn at 50 percent probability level).

**Table S4** Crystal data and structure refinement for *cis,syn*-(AA)-**23**.

|                      |                                                  |                |
|----------------------|--------------------------------------------------|----------------|
| CCDC number          | 2176601                                          |                |
| Empirical formula    | C <sub>21</sub> H <sub>29</sub> BrO <sub>4</sub> |                |
| Formula weight       | 425.35                                           |                |
| Temperature          | 129(14) K                                        |                |
| Wavelength           | 1.54184 Å                                        |                |
| Crystal system       | Triclinic                                        |                |
| Space group          | P-1                                              |                |
| Unit cell dimensions | a = 6.36017(18) Å                                | α = 91.523(4)° |
|                      | b = 7.8529(2) Å                                  | β = 91.016(4)° |
|                      | c = 20.1551(10) Å                                | γ = 93.880(2)° |

|                                   |                                             |
|-----------------------------------|---------------------------------------------|
| Volume                            | 1003.82(6) Å <sup>3</sup>                   |
| Z                                 | 2                                           |
| Density (calculated)              | 1.407 Mg/m <sup>3</sup>                     |
| Absorption coefficient            | 2.973 mm <sup>-1</sup>                      |
| F(000)                            | 444                                         |
| Crystal size                      | 0.247 x 0.171 x 0.045 mm <sup>3</sup>       |
| Theta range for data collection   | 2.193 to 74.639°.                           |
| Index ranges                      | -7<=h<=4, -9<=k<=9, -24<=l<=24              |
| Reflections collected             | 20722                                       |
| Independent reflections           | 3968 [R(int) = 0.0412]                      |
| Completeness to theta = 67.684°   | 99.8 %                                      |
| Absorption correction             | Gaussian                                    |
| Max. and min. transmission        | 1.000 and 0.415                             |
| Refinement method                 | Full-matrix least-squares on F <sup>2</sup> |
| Data / restraints / parameters    | 3968 / 0 / 240                              |
| Goodness-of-fit on F <sup>2</sup> | 1.033                                       |
| Final R indices [I>2sigma(I)]     | R1 = 0.0344, wR2 = 0.0768                   |
| R indices (all data)              | R1 = 0.0375, wR2 = 0.0788                   |
| Extinction coefficient            | n/a                                         |
| Largest diff. peak and hole       | 0.994 and -1.163 e.Å <sup>-3</sup>          |



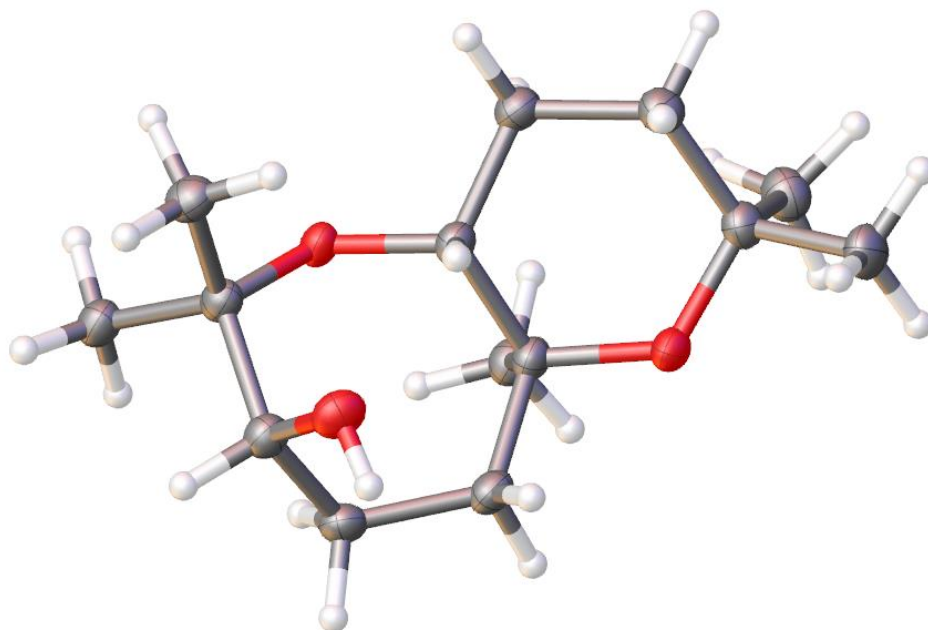

**Figure S80.** *trans,anti*-(AA)-5. View of the molecule (displacement ellipsoids drawn at 50 percent probability level)

**Table S5** Crystal data and structure refinement for *trans,anti*-(AA)-5.

|                      |                                                |                |
|----------------------|------------------------------------------------|----------------|
| CCDC number          | 2176603                                        |                |
| Empirical formula    | C <sub>14</sub> H <sub>26</sub> O <sub>3</sub> |                |
| Formula weight       | 242.35                                         |                |
| Temperature          | 119.99(10) K                                   |                |
| Wavelength           | 1.54184 Å                                      |                |
| Crystal system       | Monoclinic                                     |                |
| Space group          | P 1 21/n 1                                     |                |
| Unit cell dimensions | a = 5.8614(2) Å                                | α = 90°        |
|                      | b = 15.5412(7) Å                               | β = 90.764(4)° |

|                                   |                                             |                     |
|-----------------------------------|---------------------------------------------|---------------------|
|                                   | $c = 14.8746(7) \text{ \AA}$                | $\gamma = 90^\circ$ |
| Volume                            | 1354.85(10) $\text{\AA}^3$                  |                     |
| Z                                 | 4                                           |                     |
| Density (calculated)              | 1.188 $\text{Mg/m}^3$                       |                     |
| Absorption coefficient            | 0.646 $\text{mm}^{-1}$                      |                     |
| F(000)                            | 536                                         |                     |
| Crystal size                      | 0.083 x 0.041 x 0.023 $\text{mm}^3$         |                     |
| Theta range for data collection   | 4.114 to 74.876°.                           |                     |
| Index ranges                      | -3<=h<=7, -19<=k<=19, -18<=l<=18            |                     |
| Reflections collected             | 18499                                       |                     |
| Independent reflections           | 2728 [R(int) = 0.0827]                      |                     |
| Completeness to theta = 67.684°   | 99.8 %                                      |                     |
| Absorption correction             | Semi-empirical from equivalents             |                     |
| Max. and min. transmission        | 1.00000 and 0.49864                         |                     |
| Refinement method                 | Full-matrix least-squares on F <sup>2</sup> |                     |
| Data / restraints / parameters    | 2728 / 1 / 162                              |                     |
| Goodness-of-fit on F <sup>2</sup> | 1.088                                       |                     |
| Final R indices [I>2sigma(I)]     | R1 = 0.0735, wR2 = 0.1494                   |                     |
| R indices (all data)              | R1 = 0.0840, wR2 = 0.1561                   |                     |
| Extinction coefficient            | n/a                                         |                     |
| Largest diff. peak and hole       | 0.254 and -0.257 $\text{e.\AA}^{-3}$        |                     |

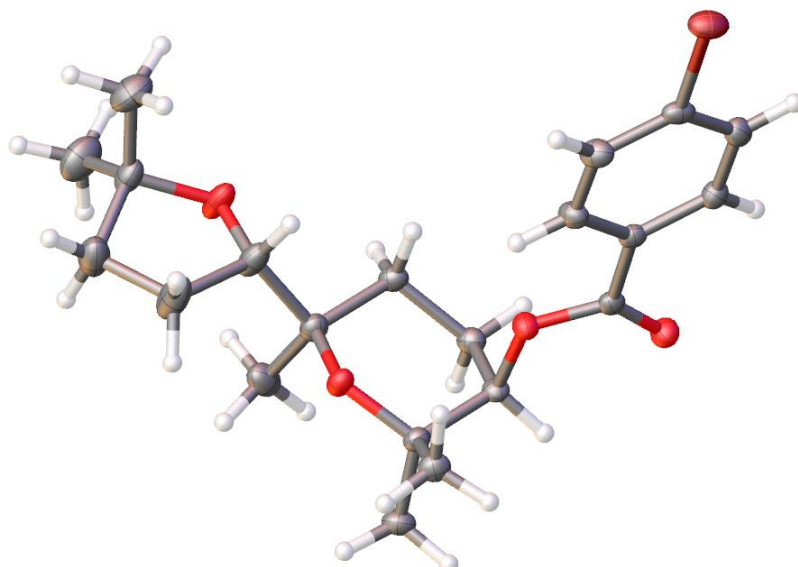

**Figure S81.** *trans,anti*-(BA)-**21**. View of the molecule (displacement ellipsoids drawn at 50 percent probability level).

**Table S6** Crystal data and structure refinement for *trans,anti*-(BA)-**21**.

|                      |                                                                                     |
|----------------------|-------------------------------------------------------------------------------------|
| CCDC number          | 2176605                                                                             |
| Empirical formula    | C <sub>21</sub> H <sub>29</sub> BrO <sub>4</sub>                                    |
| Formula weight       | 425.35                                                                              |
| Temperature          | 120.01(10) K                                                                        |
| Wavelength           | 1.54184 Å                                                                           |
| Crystal system       | Triclinic                                                                           |
| Space group          | P-1                                                                                 |
| Unit cell dimensions | a = 7.44418(10) Å      α = 69.1422(14)°<br>b = 11.53654(18) Å      β = 81.6780(12)° |

|                                   |                                             |                              |
|-----------------------------------|---------------------------------------------|------------------------------|
|                                   | $c = 12.84945(19) \text{ \AA}$              | $\gamma = 84.3027(12)^\circ$ |
| Volume                            | 1018.98(3) $\text{\AA}^3$                   |                              |
| Z                                 | 2                                           |                              |
| Density (calculated)              | 1.386 $\text{Mg/m}^3$                       |                              |
| Absorption coefficient            | 2.929 $\text{mm}^{-1}$                      |                              |
| F(000)                            | 444                                         |                              |
| Crystal size                      | 0.33 x 0.26 x 0.09 $\text{mm}^3$            |                              |
| Theta range for data collection   | 3.707 to 74.780°.                           |                              |
| Index ranges                      | -9<=h<=7, -14<=k<=14, -15<=l<=15            |                              |
| Reflections collected             | 22323                                       |                              |
| Independent reflections           | 4059 [R(int) = 0.0242]                      |                              |
| Completeness to theta = 67.684°   | 99.9 %                                      |                              |
| Absorption correction             | Analytical                                  |                              |
| Max. and min. transmission        | 0.786 and 0.465                             |                              |
| Refinement method                 | Full-matrix least-squares on F <sup>2</sup> |                              |
| Data / restraints / parameters    | 4059 / 0 / 240                              |                              |
| Goodness-of-fit on F <sup>2</sup> | 1.053                                       |                              |
| Final R indices [I>2sigma(I)]     | R1 = 0.0247, wR2 = 0.0620                   |                              |
| R indices (all data)              | R1 = 0.0251, wR2 = 0.0623                   |                              |
| Extinction coefficient            | n/a                                         |                              |
| Largest diff. peak and hole       | 0.499 and -0.416 $\text{e.\AA}^{-3}$        |                              |

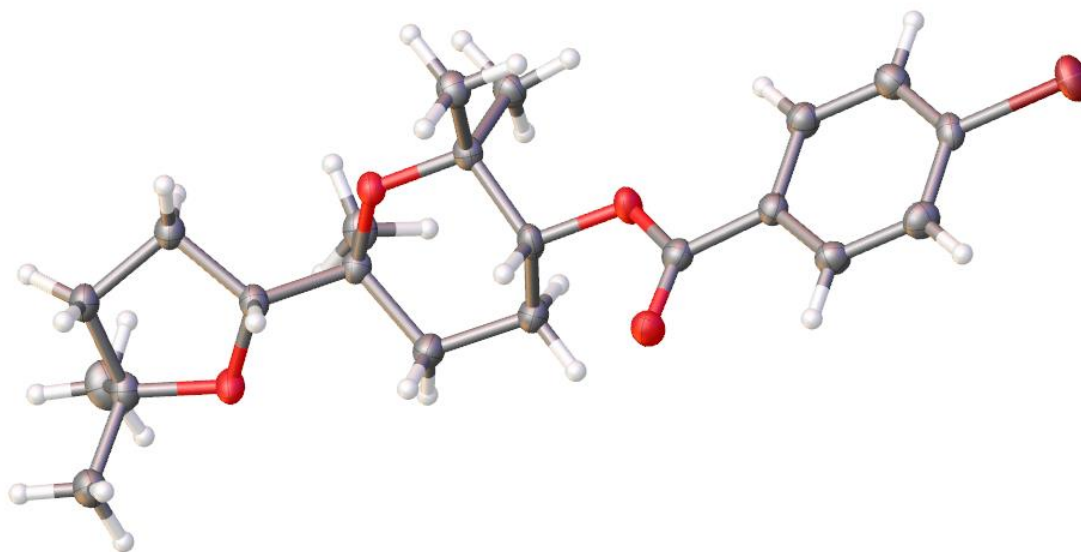

**Figure S82.** *trans,syn*-(BA)-**21**. View of the molecule (displacement ellipsoids drawn at 50 percent probability level).

**Table S7** Crystal data and structure refinement for *trans,syn*-(BA)-**21**.

|                      |                                                  |                  |
|----------------------|--------------------------------------------------|------------------|
| CCDC number          | 2176607                                          |                  |
| Empirical formula    | C <sub>21</sub> H <sub>29</sub> BrO <sub>4</sub> |                  |
| Formula weight       | 425.35                                           |                  |
| Temperature          | 119.99(10) K                                     |                  |
| Wavelength           | 1.54184 Å                                        |                  |
| Crystal system       | Triclinic                                        |                  |
| Space group          | P-1                                              |                  |
| Unit cell dimensions | a = 6.41587(11) Å                                | α = 94.139(2)°   |
|                      | b = 12.0405(3) Å                                 | β = 91.6023(17)° |

|                                   |                                             |                               |
|-----------------------------------|---------------------------------------------|-------------------------------|
|                                   | $c = 13.3039(3) \text{ \AA}$                | $\gamma = 101.2879(17)^\circ$ |
| Volume                            | 1004.29(4) $\text{\AA}^3$                   |                               |
| Z                                 | 2                                           |                               |
| Density (calculated)              | 1.407 $\text{Mg/m}^3$                       |                               |
| Absorption coefficient            | 2.972 $\text{mm}^{-1}$                      |                               |
| F(000)                            | 444                                         |                               |
| Crystal size                      | 0.31 x 0.04 x 0.03 $\text{mm}^3$            |                               |
| Theta range for data collection   | 3.334 to 74.508°.                           |                               |
| Index ranges                      | -4<=h<=7, -14<=k<=14, -16<=l<=16            |                               |
| Reflections collected             | 14479                                       |                               |
| Independent reflections           | 3964 [R(int) = 0.0303]                      |                               |
| Completeness to theta = 67.684°   | 99.9 %                                      |                               |
| Absorption correction             | Analytical                                  |                               |
| Max. and min. transmission        | 0.928 and 0.638                             |                               |
| Refinement method                 | Full-matrix least-squares on F <sup>2</sup> |                               |
| Data / restraints / parameters    | 3964 / 0 / 240                              |                               |
| Goodness-of-fit on F <sup>2</sup> | 1.060                                       |                               |
| Final R indices [I>2sigma(I)]     | R1 = 0.0361, wR2 = 0.0960                   |                               |
| R indices (all data)              | R1 = 0.0412, wR2 = 0.0986                   |                               |
| Extinction coefficient            | n/a                                         |                               |
| Largest diff. peak and hole       | 0.447 and -0.839 $\text{e.\AA}^{-3}$        |                               |

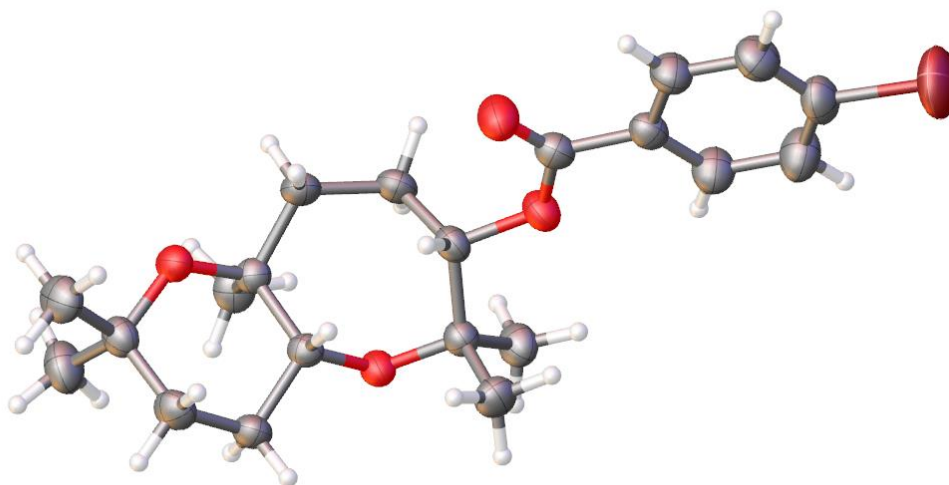

**Figure S83.** *trans,syn*-(AA)-**23**. View of the molecule (displacement ellipsoids drawn at 50 percent probability level).

**Table S8** Crystal data and structure refinement for *trans,syn*-(AA)-**23**.

|                      |                                                  |         |
|----------------------|--------------------------------------------------|---------|
| CCDC number          | 2176602                                          |         |
| Empirical formula    | C <sub>21</sub> H <sub>29</sub> BrO <sub>4</sub> |         |
| Formula weight       | 425.35                                           |         |
| Temperature          | 296.0(3) K                                       |         |
| Wavelength           | 1.54184 Å                                        |         |
| Crystal system       | Orthorhombic                                     |         |
| Space group          | Pbca                                             |         |
| Unit cell dimensions | a = 10.6941(3) Å                                 | α = 90° |
|                      | b = 8.2180(2) Å                                  | β = 90° |
|                      | c = 46.3766(14) Å                                | γ = 90° |

|                                   |                                             |
|-----------------------------------|---------------------------------------------|
| Volume                            | 4075.8(2) Å <sup>3</sup>                    |
| Z                                 | 8                                           |
| Density (calculated)              | 1.386 Mg/m <sup>3</sup>                     |
| Absorption coefficient            | 2.929 mm <sup>-1</sup>                      |
| F(000)                            | 1776                                        |
| Crystal size                      | 0.335 x 0.257 x 0.064 mm <sup>3</sup>       |
| Theta range for data collection   | 3.813 to 73.231°.                           |
| Index ranges                      | -12<=h<=10, -9<=k<=9, -56<=l<=56            |
| Reflections collected             | 69471                                       |
| Independent reflections           | 3965 [R(int) = 0.0305]                      |
| Completeness to theta = 67.684°   | 99.9 %                                      |
| Absorption correction             | Semi-empirical from equivalents             |
| Max. and min. transmission        | 1.00000 and 0.60349                         |
| Refinement method                 | Full-matrix least-squares on F <sup>2</sup> |
| Data / restraints / parameters    | 3965 / 0 / 240                              |
| Goodness-of-fit on F <sup>2</sup> | 1.051                                       |
| Final R indices [I>2sigma(I)]     | R1 = 0.0430, wR2 = 0.1083                   |
| R indices (all data)              | R1 = 0.0444, wR2 = 0.1094                   |
| Extinction coefficient            | n/a                                         |
| Largest diff. peak and hole       | 0.782 and -0.872 e.Å <sup>-3</sup>          |



## 8. Supplementary references

- S1 M. Paraja, X. Hao and S. Matile, *Angew. Chem. Int. Ed.*, 2020, **59**, 15093–15097.
- S2 A. Gini, M. Paraja, B. Galmés, C. Besnard, A. I. Poblador-Bahamonde, N. Sakai, A. Frontera and S. Matile, *Chem. Sci.*, 2020, **11**, 7086–7091.
- S3 X. Zhang, X. Hao, L. Le, A.-T. Pham, J. López-Andarias, A. Frontera, N. Sakai and S. Matile, *J. Am. Chem. Soc.*, 2018, **140**, 17867–17871.
- S4 J. M. Köster and K. Tiefenbacher, *ChemCatChem*, 2018, **10**, 2941–2944.
- S5 S. Sakane, J. Fujiwara, K. Maruoka and H. Yamamoto, *Tetrahedron*, 1986, **42**, 2193–2201.
- S6 P. Ondet, L. Lempenauer, E. Duñach and G. Lemièrre, *Org. Chem. Front.*, 2016, **3**, 999–1003.
- S7 T. B. Towne and F. E. McDonald, *J. Am. Chem. Soc.*, 1997, **119**, 6022–6028.
- S8 F.-X. Li, S.-J. Ren, P.-F. Li, P. Yang and J. Qu, *Angew. Chem. Int. Ed.*, 2020, **59**, 18473–18478.
- S9 M.-P. Fernando and P.-B. Joaquin, *J. Chem. Educ.*, 1987, **64**, 925–927.
- S10 L. M. Schwartz, *J. Chem. Educ.*, 1989, **66**, 677.
